# Supplementary material for: Pyruvic acid or DBU/O2 guided organophotoredox-catalyzed direct C–H alkylation/α-aminoalkylation of 1,2,4-triazine-3,5(2H,4H)-diones with amines
Source: Royal Society of Chemistry journal article supplement (doi:10.1039/d4qo01175a), 2024-01-01
Supplement: d4qo01175a1.pdf [file d4qo01175a1.pdf]

# Pyruvic Acid or DBU/O<sub>2</sub> Guiding Organophotoredox-Catalyzed Direct C-H Alkylation/ $\alpha$ -Aminoalkylation of 1,2,4-Triazine-3,5(2*H*, 4*H*)-diones with Amines

Zhao-Nan Cai,<sup>a</sup> Xiaohui Cao,<sup>\*b</sup> Hong-Yu Zhang,<sup>\*a</sup> Yuecheng Zhang<sup>\*a</sup> and Jiquan Zhao<sup>a</sup>

<sup>a</sup>School of Chemical Engineering and Technology, Hebei Provincial Key Lab of Green Chemical Technology & High Efficient Energy Saving, Tianjin Key Laboratory of Chemical Process Safety, Hebei University of Technology, Tianjin 300401, P. R. China. Phone: 86-22-60204726. E-mail: zhanghy@hebut.edu.cn; yczhang@hebut.edu.cn; caoxiaohui@gdpu.edu.cn

<sup>b</sup>School of Pharmacy, Guangdong Pharmaceutical University, Guangzhou 510006, China.

## Supporting Information

### Table of Contents

|                                                       |    |
|-------------------------------------------------------|----|
| I. General methods and materials.....                 | 2  |
| II. Synthesis of substrates.....                      | 2  |
| III. General procedure.....                           | 2  |
| IV. Optimization of reaction conditions.....          | 3  |
| V. Unsuitable (hetero)aromatic cycles and amines..... | 4  |
| VI. Procedure for emission quenching experiments..... | 4  |
| VII. Mechanistic Experiments.....                     | 5  |
| VIII. Scale-up experiment.....                        | 7  |
| IX. Characterization data of <b>3a-4aa</b> .....      | 8  |
| X. NMR charts of <b>3a-4u</b> .....                   | 21 |
| XI. Computational details.....                        | 72 |
| XII. References.....                                  | 92 |

## I. General methods and materials

All manipulations were performed under an air atmosphere unless otherwise stated.  $^1\text{H}$  and  $^{13}\text{C}$  NMR spectra were recorded on a Bruker AC-P 400 spectrometer (400 MHz for  $^1\text{H}$ , 100 MHz for  $^{13}\text{C}$ ) in  $\text{CDCl}_3$ . Chemical shifts (ppm) were recorded with tetramethylsilane (TMS) as the internal reference standard. Multiplicities are given as: s (singlet), d (doublet), t (triplet), dd (doublet of doublets), q (quartet) or m (multiplet). Copies of their  $^1\text{H}$  NMR and  $^{13}\text{C}$  NMR spectra are provided in the Supporting Information. High resolution mass spectra (HRMS) were recorded on quadrupole time-of-flight mass spectrometer (Q-TOF-MS) using electrospray ionization (ESI) as an ionization method. Emission intensities were recorded using an FS5 Spectrofluorometer. Solvents were dried and purified according to the procedure from "Purification of Laboratory Chemicals book". The crude products were purified by flash column chromatography on silica gel and the reported yields are the actual isolated yields of pure products. Unless stated otherwise, commercial reagents were used without further purification. All reagents were weighed and handled in air at room temperature.

## II. Synthesis of substrates

### General Procedure for the Preparation of various 1,2,4-Triazine-3,5(2*H*,4*H*)-diones

The substrates of various 1,2,4-triazine-3,5(2*H*,4*H*)-diones were synthesized according to procedures described in the previous literature studies.<sup>1,2</sup>

## III. General procedure

### Procedure for the Synthesis of **3a**

To a solution of 2,4-dibenzyl-1,2,4-triazine-3,5(2*H*, 4*H*)-dione **1a** (0.3 mmol) and 4CzIPN (5 mol%) in DMC (3 mL) were placed in a flame-dried Schlenk-tube equipped with a magnetic stir bar, followed by addition of pyruvic acid (1.5 equiv.) and diethylamine **2a** (0.6 mmol) *via* syringe. The reaction was stirred at room temperature and irradiated with a 20 W blue light-emitting diode (LED) lamp for 12 h. The progress of the reaction was monitored by TLC. After completion, the reaction mixture was removed under reduced pressure. The crude residue thus obtained was purified by column chromatography over silica gel using petroleum ether and ethyl acetate (25:1) as an eluent to afford the 2,4-dibenzyl-6-ethyl-1,2,4-triazine-3,5(2*H*, 4*H*)-dione **3a** in 91% yield.

### Procedure for the Synthesis of **4a**

To a solution of 2,4-dibenzyl-1,2,4-triazine-3,5(2*H*, 4*H*)-dione **1a** (0.3 mmol) and 4CzIPN (5 mol%) in DCM (3 mL) were placed in a flame-dried Schlenk-tube equipped with a magnetic stir bar, followed by addition of DBU (2.0 equiv.) and diethylamine **2a** (0.9 mmol) *via* syringe. The reaction was stirred at room temperature under  $\text{O}_2$  atmosphere and irradiated with a 20 W blue light-emitting diode (LED) lamp for 6 h. The progress of the reaction was monitored by TLC. After completion, the reaction

mixture was removed under reduced pressure. The crude residue thus obtained was purified by column chromatography over silica gel using petroleum ether and ethyl acetate (1:1) as an eluent to afford the 2,4-dibenzyl-6-(1-(ethylamino)ethyl)-1,2,4-triazine-3,5(2*H*, 4*H*)-dione **4a** in 79% yield.

#### IV. Optimization of reaction conditions

**Table S1** Optimization of reaction conditions for the preparation of **4a**

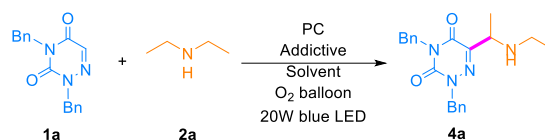

| Entry            | Photocatalyst (mol%)                                          | Base (equiv.)                        | Solvent (mL)     | <b>4a</b> Yield (%) <sup>[a]</sup> |
|------------------|---------------------------------------------------------------|--------------------------------------|------------------|------------------------------------|
| 1 <sup>[b]</sup> | 4CzIPN (5.0)                                                  | DBU (2.0)                            | DMC (3.0)        | 27                                 |
| 2 <sup>[b]</sup> | 4CzIPN (5.0)                                                  | DBU (2.0)                            | DCM (3.0)        | 52                                 |
| 3 <sup>[b]</sup> | 4CzIPN (5.0)                                                  | DBU (2.0)                            | DCE (3.0)        | 50                                 |
| 4 <sup>[b]</sup> | 4CzIPN (5.0)                                                  | DBU (2.0)                            | H2O (3.0)        | 0                                  |
| 5 <sup>[b]</sup> | 4CzIPN (5.0)                                                  | DBU (2.0)                            | EtOH (3.0)       | 0                                  |
| 6 <sup>[c]</sup> | 4CzIPN (5.0)                                                  | DBU (2.0)                            | DCM (3.0)        | 63                                 |
| <b>7</b>         | <b>4CzIPN (5.0)</b>                                           | <b>DBU (2.0)</b>                     | <b>DCM (3.0)</b> | <b>79</b>                          |
| 8                | EoSinY (5.0)                                                  | DBU (2.0)                            | DCM (3.0)        | 0                                  |
| 9                | (Mes-Acr-Me) <sup>+</sup> ClO <sub>4</sub> <sup>-</sup> (5.0) | DBU (2.0)                            | DCM (3.0)        | 17                                 |
| 10               | RoseBengal (5.0)                                              | DBU (2.0)                            | DCM (3.0)        | 0                                  |
| 11               | 4CzPN (5.0)                                                   | DBU (2.0)                            | DCM (3.0)        | 53                                 |
| 12               | 5CzPN (5.0)                                                   | DBU (2.0)                            | DCM (3.0)        | 27                                 |
| 13               | 4CzIPN (5.0)                                                  | TMG (2.0)                            | DCM (3.0)        | 0                                  |
| 14               | 4CzIPN (5.0)                                                  | DBN (2.0)                            | DCM (3.0)        | 35                                 |
| 15               | 4CzIPN (5.0)                                                  | Pyridine (2.0)                       | DCM (3.0)        | 0                                  |
| 16               | 4CzIPN (5.0)                                                  | K <sub>3</sub> PO <sub>4</sub> (2.0) | DCM (3.0)        | 20                                 |
| 17               | 4CzIPN (5.0)                                                  | K <sub>2</sub> CO <sub>3</sub> (2.0) | DCM (3.0)        | 0                                  |
| 18               | 4CzIPN (3.0)                                                  | DBU (2.0)                            | DCM (3.0)        | 58                                 |
| 19               | 4CzIPN (7.0)                                                  | DBU (2.0)                            | DCM (3.0)        | 77                                 |
| 20               | 4CzIPN (5.0)                                                  | DBU (1.5)                            | DCM (3.0)        | 60                                 |
| 21               | 4CzIPN (5.0)                                                  | DBU (2.5)                            | DCM (3.0)        | 79                                 |

Reaction conditions: **1a** (0.3 mmol), **2a** (0.9 mmol), 4CzIPN(5 mol%) and DBU (2.0 equiv.) reacted in DCM (3.0 mL) at room temperature for 6 h under the irradiation of blue LED (20 W) in the O<sub>2</sub> atmosphere. <sup>[a]</sup> Isolated yields. <sup>[b]</sup> **2a** (0.6 mmol). <sup>[c]</sup> **2a** (0.75 mmol).

## V. Unsuitable (hetero)aromatic cycles and amines.

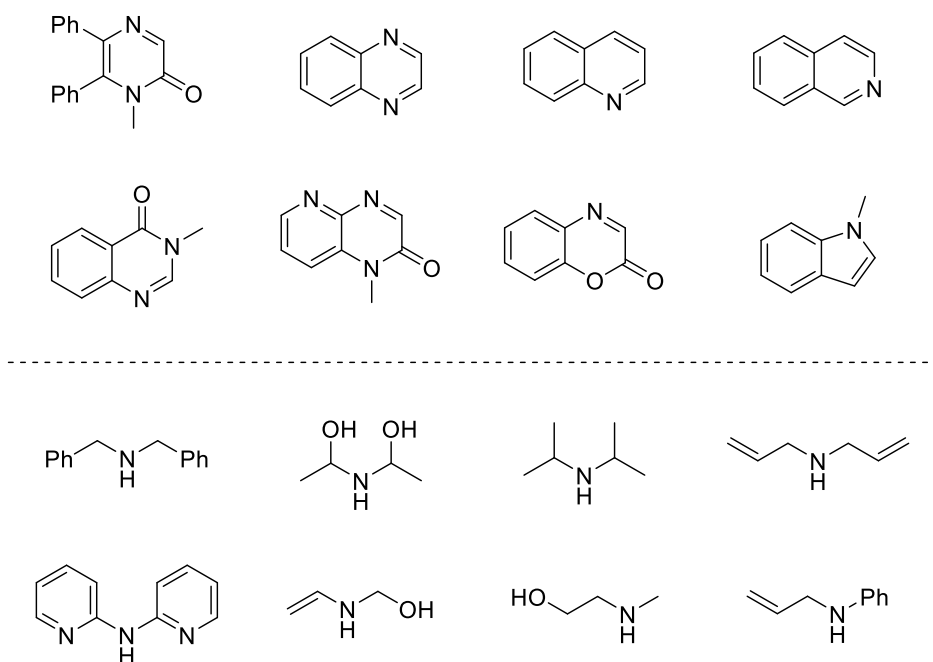

Figure S1 Unsuitable (hetero)aromatic cycles and amines

## VI. Procedure for emission quenching experiments

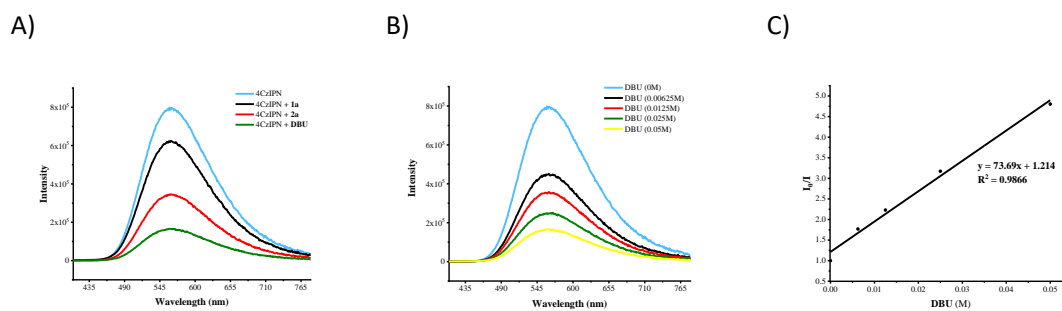

Figure S2 Luminescence quenching study

Emission intensities were recorded using an FS5 Spectrofluorometer. First, the emission intensity of 4CzIPN solutions was observed at 550 nm. The solutions were irradiated at 378 nm (Maximum absorption wavelength of 4CzIPN) and fluorescence was measured from 400 nm to 700 nm. In a typical experiment, the emission spectrum of a  $5 \times 10^{-5}$  M solution of 4CzIPN with different concentration of **1a**, **2a** and DBU in degassed anhydrous  $\text{CH}_3\text{CN}$  in 10 mm path length quartz cuvette was collected: A) the emission spectra of  $5 \times 10^{-5}$  M solutions of 4CzIPN with reactants (**1a**, **2a** and DBU) in degassed anhydrous  $\text{CH}_3\text{CN}$ ; B) the emission spectra of a  $5 \times 10^{-5}$  M solution of 4CzIPN with various concentrations of DBU in degassed anhydrous  $\text{CH}_3\text{CN}$ . C) the linear relationship between  $I_0/I$

and the increasing concentration of DBU ( $I_0$  and  $I$  are the fluorescence intensities before and after the increasing the concentration of DBU, respectively.).

## VII. Mechanistic Experiments

### Control experiment

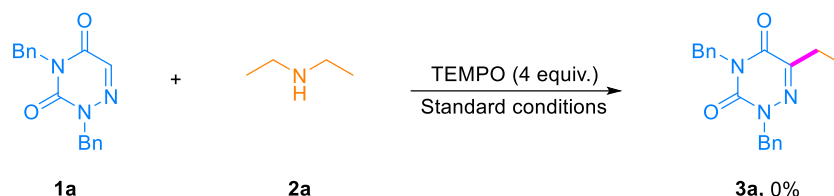

To a solution of 2,4-dibenzyl-1,2,4-triazine-3,5(*2H*, *4H*)-dione **1a** (0.3 mmol), 4CzIPN (5 mol%) and 2,2,6,6-tetramethyl-1-piperidinyloxy (TEMPO) (4.0 equiv.) in DMC (3 mL) were placed in a flame-dried Schlenk-tube equipped with a magnetic stir bar, followed by addition of pyruvic acid (1.5 equiv.) and diethylamine **2a** (0.6 mmol) *via* syringe. The reaction was stirred at room temperature and irradiated with a 20 W blue light-emitting diode (LED) lamp for 12 h. The target product **3a** was not detected by TLC.

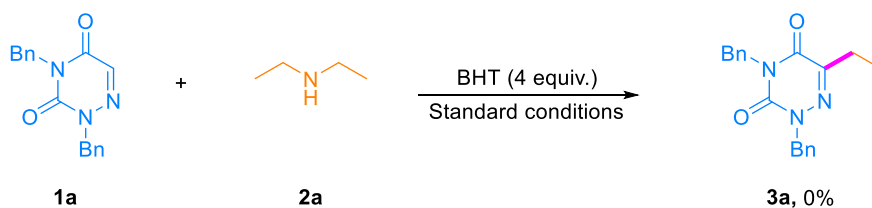

To a solution of 2,4-dibenzyl-1,2,4-triazine-3,5(*2H*, *4H*)-dione **1a** (0.3 mmol), 4CzIPN (5 mol%) and butylated hydroxytoluene (BHT) (4.0 equiv.) in DMC (3 mL) were placed in a flame-dried Schlenk-tube equipped with a magnetic stir bar, followed by addition of pyruvic acid (1.5 equiv.) and diethylamine **2a** (0.6 mmol) *via* syringe. The reaction was stirred at room temperature and irradiated with a 20 W blue light-emitting diode (LED) lamp for 12 h. The target product **3a** was not detected by TLC.

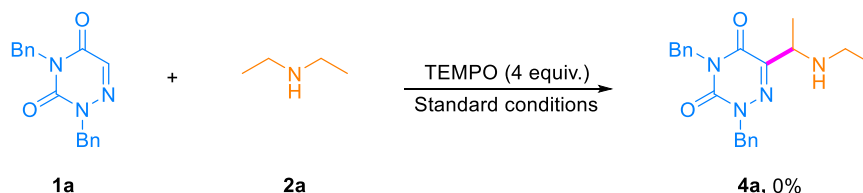

To a solution of 2,4-dibenzyl-1,2,4-triazine-3,5(*2H*, *4H*)-dione **1a** (0.3 mmol), 4CzIPN (5 mol%) and 2,2,6,6-tetramethyl-1-piperidinyloxy (TEMPO) (4.0 equiv.) in DCM (3 mL) were placed in a flame-dried Schlenk-tube equipped with a magnetic stir bar, followed by addition of DBU (2.0 equiv.) and diethylamine **2a** (0.9 mmol) *via* syringe. The reaction was stirred at room temperature under  $O_2$  atmosphere and irradiated with a 20 W blue light-emitting diode (LED) lamp for 6 h. The target



Schlenk-tube equipped with a magnetic stir bar, followed by addition of DBU (2.0 equiv.) and diethylamine **2a** (0.9 mmol) *via* syringe. The reaction was stirred at room temperature under O<sub>2</sub> atmosphere and irradiated with a 20 W blue light-emitting diode (LED) lamp for 6 h. The progress of the reaction was monitored by TLC. After completion, the reaction mixture was removed under reduced pressure. The crude residue thus obtained was purified by column chromatography over silica gel using petroleum ether and ethyl acetate (1:1) as an eluent to afford the 2,4-dibenzyl-6-(1-(ethylamino)ethyl)-1,2,4-triazine-3,5(2*H*, 4*H*)-dione **4a** in 24% yield.

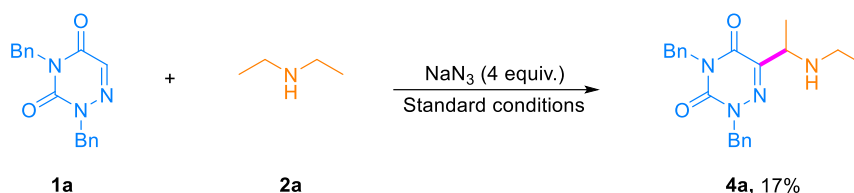

To a solution of 2,4-dibenzyl-1,2,4-triazine-3,5(2*H*, 4*H*)-dione **1a** (0.3 mmol), 4CzIPN (5 mol%) and NaN<sub>3</sub> (4.0 equiv.) in DCM (3 mL) were placed in a flame-dried Schlenk-tube equipped with a magnetic stir bar, followed by addition of DBU (2.0 equiv.) and diethylamine **2a** (0.9 mmol) *via* syringe. The reaction was stirred at room temperature under O<sub>2</sub> atmosphere and irradiated with a 20 W blue light-emitting diode (LED) lamp for 6 h. The progress of the reaction was monitored by TLC. After completion, the reaction mixture was removed under reduced pressure. The crude residue thus obtained was purified by column chromatography over silica gel using petroleum ether and ethyl acetate (1:1) as an eluent to afford the 2,4-dibenzyl-6-(1-(ethylamino)ethyl)-1,2,4-triazine-3,5(2*H*, 4*H*)-dione **4a** in 17% yield.

## VIII. Scale-up experiment

### Gram-scale synthesis of **3a**

To a solution of 2,4-dibenzyl-1,2,4-triazine-3,5(2*H*, 4*H*)-dione **1a** (1.17 g, 4 mmol) and 4CzIPN (5 mol%) in DMC (0.1 M) were placed in a flame-dried Schlenk-tube equipped with a magnetic stir bar, followed by addition of pyruvic acid (1.5 equiv.) and diethylamine **2a** (0.59g, 8 mmol) *via* syringe. The reaction was stirred at room temperature and irradiated with a 20 W blue light-emitting diode (LED) lamp for 24 h. The progress of the reaction was monitored by TLC. After completion, the reaction mixture was removed under reduced pressure. The crude residue thus obtained was purified by column chromatography over silica gel using petroleum ether and ethyl acetate (25:1) as an eluent to afford the 2,4-dibenzyl-6-ethyl-1,2,4-triazine-3,5(2*H*, 4*H*)-dione **3a** (1.04 g) in 81% yield.

### Gram-scale synthesis of **4a**

To a solution of 2,4-dibenzyl-1,2,4-triazine-3,5(2*H*, 4*H*)-dione **1a** (1.17 g, 4 mmol) and 4CzIPN (5 mol%) in DCM (0.1 M) were placed in a flame-dried Schlenk-tube equipped with a magnetic stir bar, followed by addition of DBU (2.0 equiv.) and diethylamine **2a** (0.88g, 12 mmol) *via* syringe. The reaction was stirred at room temperature under O<sub>2</sub> atmosphere and irradiated with a 20 W blue

light-emitting diode (LED) lamp for 6 h. The progress of the reaction was monitored by TLC. After completion, the reaction mixture was removed under reduced pressure. The crude residue thus obtained was purified by column chromatography over silica gel using petroleum ether and ethyl acetate (1:1) as an eluent to afford the 2,4-dibenzyl-6-(1-(ethylamino)ethyl)-1,2,4-triazine-3,5(2*H*, 4*H*)-dione **4a** (0.90 g) in 62% yield.

## IX. Characterization data of 3a-4aa

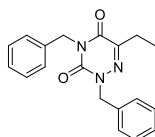

*2,4-dibenzyl-6-ethyl-1,2,4-triazine-3,5(2*H*,4*H*)-dione (3a)*. a colorless liquid (91% yield, 87.3 mg). (PET/EtOAc = 25:1 as the eluent). <sup>1</sup>H NMR (400 MHz, CDCl<sub>3</sub>) δ: 7.49–7.48 (m, 2H), 7.42–7.41 (m, 2H), 7.37–7.30 (m, 6H), 5.09 (s, 2H), 5.09 (s, 2H), 2.64 (t, *J* = 7.4 Hz, 2H), 1.19 (t, *J* = 7.4 Hz, 3H); <sup>13</sup>C NMR (100 MHz, CDCl<sub>3</sub>) δ: 156.0, 149.1, 146.6, 136.0, 135.8, 129.5, 128.8, 128.7, 128.6, 128.2, 128.1, 55.3, 44.2, 23.9, 10.4; HRMS (ESI): *m/z* calcd for C<sub>19</sub>H<sub>20</sub>N<sub>3</sub>O<sub>2</sub><sup>+</sup> [M+H]<sup>+</sup> 322.1550. Found 322.1550.

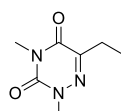

*6-ethyl-2,4-dimethyl-1,2,4-triazine-3,5(2*H*,4*H*)-dione (3b)*. a colorless liquid (51% yield, 25.9 mg). (PET/EtOAc = 25:1 as the eluent). <sup>1</sup>H NMR (400 MHz, CDCl<sub>3</sub>) δ: 3.61 (s, 3H), 3.35 (s, 3H), 2.64 (q, *J* = 7.3 Hz, 2H), 1.19 (t, *J* = 7.2 Hz, 3H); <sup>13</sup>C NMR (100 MHz, CDCl<sub>3</sub>) δ: 156.4, 149.4, 145.8, 39.3, 27.1, 23.8, 10.6; HRMS (ESI): *m/z* calcd for C<sub>7</sub>H<sub>11</sub>N<sub>3</sub>NaO<sub>2</sub><sup>+</sup> [M+Na]<sup>+</sup> 192.0743. Found 192.0743.

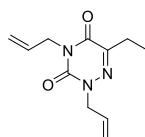

*2,4-diallyl-6-ethyl-1,2,4-triazine-3,5(2*H*,4*H*)-dione (3c)*. a colorless liquid (81% yield, 53.5 mg). (PET/EtOAc = 25:1 as the eluent). <sup>1</sup>H NMR (400 MHz, CDCl<sub>3</sub>) δ: 5.98–5.81 (m, 2H), 5.31–5.21 (m, 4H), 4.53 (s, 4H), 2.63 (q, *J* = 7.3 Hz, 2H), 1.18 (t, *J* = 7.3 Hz, 3H); <sup>13</sup>C NMR (100 MHz, CDCl<sub>3</sub>) δ: 155.7, 148.5, 146.4, 131.6, 130.5, 119.0, 118.8, 53.9, 42.8, 23.8, 10.5; HRMS (ESI): *m/z* calcd for C<sub>11</sub>H<sub>15</sub>N<sub>3</sub>NaO<sub>2</sub><sup>+</sup> [M+Na]<sup>+</sup> 244.1056. Found 244.1053.

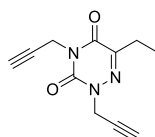

*6-ethyl-2,4-di(prop-2-yn-1-yl)-1,2,4-triazine-3,5(2*H*,4*H*)-dione (3d)*. a colorless liquid (87% yield, 56.8 mg). (PET/EtOAc = 25:1 as the eluent). <sup>1</sup>H NMR (400 MHz, CDCl<sub>3</sub>) δ: 4.74 (s, 2H), 4.68 (s, 2H), 2.68 (q, *J* = 7.3 Hz, 2H), 2.35 (s, 1H), 2.21 (s, 1H), 1.20 (t, *J* = 7.4 Hz, 3H); <sup>13</sup>C NMR (100 MHz, CDCl<sub>3</sub>) δ: 155.0, 147.6, 147.1, 76.9, 76.6, 73.3, 71.6, 41.2, 29.9, 23.8,



10.3; HRMS (ESI):  $m/z$  calcd for  $C_{11}H_{11}N_3NaO_2^+$   $[M+Na]^+$  240.0743. Found 240.0744.

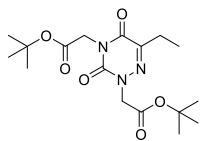

*di-tert-butyl 2,2'-(6-ethyl-3,5-dioxo-1,2,4-triazine-2,4(3H,5H)-diyl)diacetate (3e)*. a colorless liquid (56% yield, 61.6 mg). (PET/EtOAc = 25:1 as the eluent).  $^1H$  NMR (400 MHz,  $CDCl_3$ )  $\delta$ : 4.56 (s, 4H), 2.65 (q,  $J = 7.0$  Hz, 2H), 1.46 (s, 18H), 1.17 (t,  $J = 7.3$  Hz, 3H);  $^{13}C$  NMR (100 MHz,  $CDCl_3$ )  $\delta$ : 166.5, 165.6, 155.5, 148.7, 146.6, 82.8, 82.7, 53.3, 42.0, 28.0, 27.9, 23.7, 10.3; HRMS (ESI):  $m/z$  calcd for  $C_{17}H_{27}N_3NaO_6^+$   $[M+Na]^+$  392.1792. Found 392.1794.

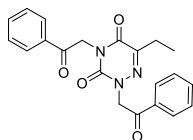

*6-ethyl-2,4-bis(2-oxo-2-phenylethyl)-1,2,4-triazine-3,5(2H,4H)-dione (3f)*. a colorless liquid (73% yield, 82.6 mg). (PET/EtOAc = 25:1 as the eluent).  $^1H$  NMR (400 MHz,  $CDCl_3$ )  $\delta$ : 7.98 (t,  $J = 6.5$  Hz, 4H), 7.64–7.59 (m, 2H), 7.52–7.47 (m, 4H), 5.41 (s, 2H), 5.39 (s, 2H), 2.67 (q,  $J = 7.3$  Hz, 2H), 1.19 (t,  $J = 7.3$  Hz, 3H);  $^{13}C$  NMR (100 MHz,  $CDCl_3$ )  $\delta$ : 191.6, 190.4, 155.7, 149.1, 146.8, 134.4, 134.3, 134.0, 133.9, 128.8, 128.7, 128.0, 127.9, 57.3, 46.4, 23.7, 10.2; HRMS (ESI):  $m/z$  calcd for  $C_{21}H_{19}N_3NaO_4^+$   $[M+Na]^+$  400.1268. Found 400.1264.

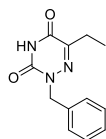

*2-benzyl-6-ethyl-1,2,4-triazine-3,5(2H,4H)-dione (3g)*. a colorless liquid (89% yield, 61.7 mg). (PET/EtOAc = 25:1 as the eluent).  $^1H$  NMR (400 MHz,  $CDCl_3$ )  $\delta$ : 9.92 (s, 1H), 7.50–7.48 (m, 2H), 7.34–7.28 (m, 3H), 5.09 (s, 2H), 2.63 (q,  $J = 7.3$  Hz, 2H), 1.18 (t,  $J = 7.3$  Hz, 3H);  $^{13}C$  NMR (100 MHz,  $CDCl_3$ )  $\delta$ : 156.0, 150.1, 147.4, 135.4, 129.4, 128.6, 128.1, 43.5, 23.7, 10.2; HRMS (ESI):  $m/z$  calcd for  $C_{12}H_{13}N_3NaO_2^+$   $[M+Na]^+$  254.0900. Found 254.0899.

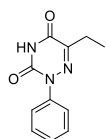

*6-ethyl-2-phenyl-1,2,4-triazine-3,5(2H,4H)-dione (3h)*. a colorless liquid (31% yield, 20.1 mg). (PET/EtOAc = 25:1 as the eluent).  $^1H$  NMR (400 MHz,  $CDCl_3$ )  $\delta$ : 10.21 (s, 1H), 7.56–7.47 (m, 3H), 7.27 (s, 2H), 2.70 (q,  $J = 7.2$  Hz, 2H), 1.23 (t,  $J = 7.3$  Hz, 3H);  $^{13}C$  NMR (100 MHz,  $CDCl_3$ )  $\delta$ : 155.9, 150.0, 147.9, 132.3, 129.5, 129.4, 127.8, 23.8, 10.2; HRMS (ESI):  $m/z$  calcd for  $C_{11}H_{11}N_3NaO_2^+$   $[M+Na]^+$  240.0743. Found 240.0742.

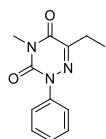

*6-ethyl-4-methyl-2-phenyl-1,2,4-triazine-3,5(2H,4H)-dione (3i)*. a colorless liquid (79% yield, 54.8 mg). (PET/EtOAc = 25:1 as the eluent).  $^1H$  NMR (400 MHz,  $CDCl_3$ )  $\delta$ : 7.52–7.43 (m, 3

H), 7.23–7.21 (m, 2H), 3.66 (s, 3H), 2.69 (q,  $J = 7.3$  Hz, 2H), 1.24 (t,  $J = 7.4$  Hz, 3H);  $^{13}\text{C}$  NMR (100 MHz,  $\text{CDCl}_3$ )  $\delta$ : 156.1, 149.0, 146.8, 133.2, 129.4, 129.2, 127.8, 39.4, 23.9, 10.5; HRMS (ESI):  $m/z$  calcd for  $\text{C}_{12}\text{H}_{14}\text{N}_3\text{O}_2^+$   $[\text{M}+\text{H}]^+$  232.1081. Found 232.1080.

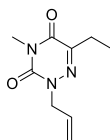

*2-allyl-6-ethyl-4-methyl-1,2,4-triazine-3,5(2H,4H)-dione (3j)*. a colorless liquid (79% yield, 46.5 mg). (PET/EtOAc = 25:1 as the eluent).  $^1\text{H}$  NMR (400 MHz,  $\text{CDCl}_3$ )  $\delta$ : 5.90–5.81 (m, 1H), 5.31–5.21 (m, 2H), 4.52 (d,  $J = 5.5$  Hz, 2H), 3.60 (s, 3H), 2.63 (q,  $J = 7.3$  Hz, 2H), 1.18 (t,  $J = 7.3$  Hz, 3H);  $^{13}\text{C}$  NMR (100 MHz,  $\text{CDCl}_3$ )  $\delta$ : 155.9, 148.9, 146.1, 130.5, 119.1, 42.8, 39.2, 23.7, 10.5; HRMS (ESI):  $m/z$  calcd for  $\text{C}_9\text{H}_{13}\text{N}_3\text{NaO}_2^+$   $[\text{M}+\text{Na}]^+$  218.0900. Found 218.0903.

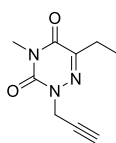

*6-ethyl-4-methyl-2-(prop-2-yn-1-yl)-1,2,4-triazine-3,5(2H,4H)-dione (3k)*. a colorless liquid (85% yield, 49.3 mg). (PET/EtOAc = 25:1 as the eluent).  $^1\text{H}$  NMR (400 MHz,  $\text{CDCl}_3$ )  $\delta$ : 4.68–4.67 (m, 2H), 3.61 (s, 3H), 2.64 (q,  $J = 7.3$  Hz, 2H), 2.20 (s, 1H), 1.18 (t,  $J = 7.4$  Hz, 3H);  $^{13}\text{C}$  NMR (100 MHz,  $\text{CDCl}_3$ )  $\delta$ : 155.2, 148.3, 146.1, 76.8, 71.4, 39.3, 29.8, 23.7, 10.4; HRMS (ESI):  $m/z$  calcd for  $\text{C}_9\text{H}_{11}\text{N}_3\text{NaO}_2^+$   $[\text{M}+\text{Na}]^+$  216.0743. Found 216.0742.

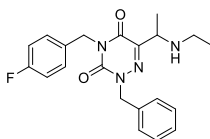

*2-benzyl-6-(1-(ethylamino)ethyl)-4-(4-fluorobenzyl)-1,2,4-triazine-3,5(2H,4H)-dione (3l)*. a colorless liquid (65% yield, 65.8 mg). (PET/EtOAc = 25:1 as the eluent).  $^1\text{H}$  NMR (400 MHz,  $\text{CDCl}_3$ )  $\delta$ : 7.49–7.47 (m, 2H), 7.42–7.39 (m, 2H), 7.33–7.30 (m, 3H), 7.03 (t,  $J = 8.4$  Hz, 2H), 5.08 (s, 2H), 5.05 (s, 2H), 2.64 (q,  $J = 7.3$  Hz, 2H), 1.19 (t,  $J = 7.4$  Hz, 3H);  $^{13}\text{C}$  NMR (100 MHz,  $\text{CDCl}_3$ )  $\delta$ : 163.8, 161.4, 155.9, 149.0, 146.6, 135.6, 131.7, 130.7, 130.6, 129.4, 128.5, 128.0, 115.6, 115.4, 54.4, 44.1, 23.7, 10.3; HRMS (ESI):  $m/z$  calcd for  $\text{C}_{19}\text{H}_{18}\text{FN}_3\text{NaO}_2^+$   $[\text{M}+\text{Na}]^+$  362.1275. Found 362.1274.

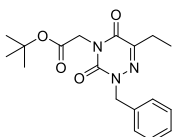

*tert-butyl 2-(2-benzyl-6-ethyl-3,5-dioxo-2,5-dihydro-1,2,4-triazin-4(3H)-yl)acetate (3m)*. a colorless liquid (76% yield, 79.0 mg). (PET/EtOAc = 25:1 as the eluent).  $^1\text{H}$  NMR (400 MHz,  $\text{CDCl}_3$ )  $\delta$ : 7.47–7.45 (m, 2H), 7.30–7.28 (m, 2H), 5.10 (s, 2H), 4.56 (s, 2H), 2.64 (q,  $J = 7.3$  Hz, 2H), 1.45 (s, 9H), 1.17 (t,  $J = 7.4$  Hz, 3H);  $^{13}\text{C}$  NMR (100 MHz,  $\text{CDCl}_3$ )  $\delta$ : 166.6, 155.9, 149.2, 146.8, 135.5, 129.2, 128.5, 127.9, 82.8, 53.3, 44.0, 27.9, 23.7, 10.3; HRMS (ESI):  $m/z$  calcd for  $\text{C}_{18}\text{H}_{23}\text{N}_3\text{NaO}_4^+$   $[\text{M}+\text{Na}]^+$  368.1581. Found 368.1578.

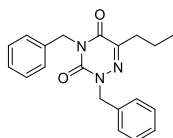

*2,4-dibenzyl-6-propyl-1,2,4-triazine-3,5(2H,4H)-dione (3n)*. a colorless liquid (51% yield, 51.7 mg). <sup>1</sup>H NMR (400 MHz, CDCl<sub>3</sub>) δ: 7.49–7.48 (m, 2H), 7.42–7.40 (m, 2H), 7.37–7.30 (m, 6H), 5.09 (s, 4H), 2.59 (t, *J* = 7.4 Hz, 2H), 1.69–1.63 (m, 2H), 0.97 (t, *J* = 7.3 Hz, 3H); <sup>13</sup>C NMR (100 MHz, CDCl<sub>3</sub>) δ: 156.0, 149.0, 145.6, 135.8, 135.7, 129.4, 128.6, 128.5, 128.1, 128.0, 55.1, 44.1, 32.2, 19.6, 13.7; HRMS (ESI): *m/z* calcd for C<sub>20</sub>H<sub>21</sub>N<sub>3</sub>NaO<sub>2</sub><sup>+</sup> [M+Na]<sup>+</sup> 358.1526. Found 358.1524.

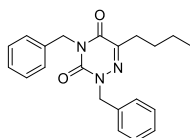

*2,4-dibenzyl-6-butyl-1,2,4-triazine-3,5(2H,4H)-dione (3o)*. a colorless liquid (46% yield, 48.3 mg). (PET/EtOAc = 25:1 as the eluent). <sup>1</sup>H NMR (400 MHz, CDCl<sub>3</sub>) δ: 7.50–7.48 (m, 2H), 7.42–7.40 (m, 2H), 7.37–7.30 (m, 6H), 5.09 (s, 4H), 2.61 (t, *J* = 7.6 Hz, 2H), 1.63–1.57 (m, 2H), 1.38 (q, *J* = 7.3 Hz, 2H), 0.94 (t, *J* = 7.3 Hz, 3H); <sup>13</sup>C NMR (100 MHz, CDCl<sub>3</sub>) δ: 156.0, 149.0, 145.7, 135.8, 135.7, 129.4, 128.6, 128.6, 128.5, 128.1, 128.0, 55.1, 44.1, 30.0, 28.2, 22.2, 13.8; HRMS (ESI): *m/z* calcd for C<sub>21</sub>H<sub>23</sub>N<sub>3</sub>NaO<sub>2</sub><sup>+</sup> [M+Na]<sup>+</sup> 372.1682. Found 372.1681.

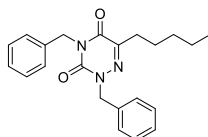

*2,4-dibenzyl-6-pentyl-1,2,4-triazine-3,5(2H,4H)-dione (3p)*. a colorless liquid (34% yield, 37.2 mg). <sup>1</sup>H NMR (400 MHz, CDCl<sub>3</sub>) δ: 7.50–7.48 (m, 2H), 7.42–7.40 (m, 2H), 7.37–7.30 (m, 6H), 5.09 (s, 4H), 2.61 (t, *J* = 7.6 Hz, 2H), 1.65–1.61 (m, 2H), 1.34 (s, 4H), 0.90 (t, *J* = 6.1 Hz, 3H); <sup>13</sup>C NMR (100 MHz, CDCl<sub>3</sub>) δ: 156.0, 149.0, 145.7, 135.9, 135.7, 129.4, 128.6, 128.6, 128.5, 128.1, 127.9, 55.1, 44.1, 31.3, 30.2, 25.8, 22.3, 14.0; HRMS (ESI): *m/z* calcd for C<sub>22</sub>H<sub>25</sub>N<sub>3</sub>NaO<sub>2</sub><sup>+</sup> [M+Na]<sup>+</sup> 386.1839. Found 386.1839.

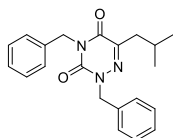

*2,4-dibenzyl-6-isobutyl-1,2,4-triazine-3,5(2H,4H)-dione (3q)*. a colorless liquid (72% yield, 75.1 mg). (PET/EtOAc = 25:1 as the eluent). <sup>1</sup>H NMR (400 MHz, CDCl<sub>3</sub>) δ: 7.48–7.47 (m, 2H), 7.41–7.39 (m, 2H), 7.34–7.30 (m, 6H), 5.09 (s, 2H), 5.09 (s, 2H), 2.48 (d, *J* = 7.0 Hz, 2H), 2.13–2.03 (m, 1H), 0.93 (d, *J* = 6.6 Hz, 6H); <sup>13</sup>C NMR (100 MHz, CDCl<sub>3</sub>) δ: 156.1, 148.9, 145.0, 135.8, 135.7, 129.4, 128.6, 128.6, 128.5, 128.1, 128.0, 55.2, 44.1, 39.0, 26.2, 22.4; HRMS (ESI): *m/z* calcd for C<sub>21</sub>H<sub>23</sub>N<sub>3</sub>NaO<sub>2</sub><sup>+</sup> [M+Na]<sup>+</sup> 372.1682. Found 372.1682.

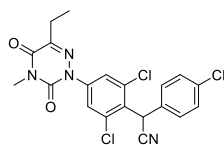

2-(4-chlorophenyl)-2-(2,6-dichloro-4-(6-ethyl-4-methyl-3,5-dioxo-4,5-dihydro-1,2,4-triazin-2(3H)-yl)phenyl)acetonitrile (**3r**), a colorless liquid (41% yield, 55.1 mg). (PET/EtOAc = 25:1 as the eluet). <sup>1</sup>H NMR (400 MHz, CDCl<sub>3</sub>) δ: 7.79 (s, 2H), 7.33 (q, *J* = 8.2 Hz, 4H), 6.18 (s, 1H), 3.42 (s, 3H), 2.77 (q, *J* = 7.1 Hz, 2H), 1.26 (s, 3H); <sup>13</sup>C NMR (100 MHz, CDCl<sub>3</sub>) δ: 155.3, 148.2, 141.7, 135.6, 134.2, 130.8, 129.6, 129.1, 128.2, 124.8, 116.2, 36.9, 27.5, 24.1, 10.4; HRMS (ESI): *m/z* calcd for C<sub>20</sub>H<sub>15</sub>C<sub>13</sub>N<sub>4</sub>NaO<sub>2</sub><sup>+</sup> [M+Na]<sup>+</sup> 471.0153. Found 471.0153.

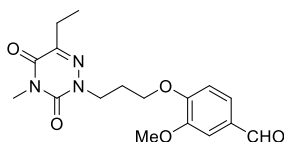

4-(3-(6-ethyl-4-methyl-3,5-dioxo-4,5-dihydro-1,2,4-triazin-2(3H)-yl)propoxy)-3-methoxybenzaldehyde (**3s**), a colorless liquid (37% yield, 43.0 mg). (PET/EtOAc = 25:1 as the eluet). <sup>1</sup>H NMR (400 MHz, CDCl<sub>3</sub>) δ: 9.83 (s, 1H), 7.41 (d, *J* = 7.7 Hz, 1H), 7.36 (s, 1H), 6.91 (d, *J* = 8.2 Hz, 1H), 4.21–4.17 (m, 4H), 3.83 (s, 3H), 3.54 (s, 3H), 2.57 (q, *J* = 7.2 Hz, 2H), 2.28–2.26 (m, 2H), 1.15 (t, *J* = 7.2 Hz, 3H); <sup>13</sup>C NMR (100 MHz, CDCl<sub>3</sub>) δ: 190.9, 156.4, 153.6, 149.6, 149.3, 145.9, 130.0, 127.0, 111.2, 108.8, 67.4, 55.7, 38.8, 29.7, 27.0, 23.7, 10.4; HRMS (ESI): *m/z* calcd for C<sub>17</sub>H<sub>21</sub>N<sub>3</sub>NaO<sub>5</sub><sup>+</sup> [M+Na]<sup>+</sup> 370.1373. Found 370.1371.

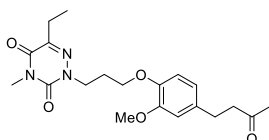

6-ethyl-2-(3-(2-methoxy-4-(3-oxobutyl)phenoxy)propyl)-4-methyl-1,2,4-triazine-3,5-dione (**3t**), a colorless liquid (40% yield, 51.9 mg). (PET/EtOAc = 25:1 as the eluet). <sup>1</sup>H NMR (400 MHz, CDCl<sub>3</sub>) δ: 6.76–6.74 (m, 1H), 6.66 (s, 2H), 4.15 (t, *J* = 6.5 Hz, 2H), 4.05 (t, *J* = 5.8 Hz, 2H), 3.78 (s, 3H), 3.56 (s, 3H), 2.83–2.80 (m, 2H), 2.74–2.70 (m, 2H), 2.58 (q, *J* = 7.2 Hz, 2H), 2.20–2.17 (m, 2H), 2.13 (s, 3H), 1.15 (t, *J* = 7.3 Hz, 3H); <sup>13</sup>C NMR (100 MHz, CDCl<sub>3</sub>) δ: 208.1, 156.3, 149.3, 149.2, 146.5, 145.9, 133.9, 120.1, 113.4, 112.1, 67.2, 55.7, 45.4, 39.2, 38.7, 30.1, 29.4, 27.2, 23.7, 10.4; HRMS (ESI): *m/z* calcd for C<sub>20</sub>H<sub>27</sub>N<sub>3</sub>NaO<sub>5</sub><sup>+</sup> [M+Na]<sup>+</sup> 412.1843. Found 412.1844.

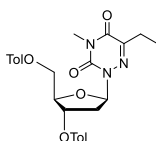

(2*R*,3*S*,5*R*)-5-(6-ethyl-4-methyl-3,5-dioxo-4,5-dihydro-1,2,4-triazin-2(3H)-yl)-2-(((4-methylbenzoyl)oxy)methyl)tetrahydrofuran-3-yl 4-methylbenzoate (**3u**), a colorless liquid (51% yield, 77.6 mg). (PET/EtOAc = 25:1 as the eluet). <sup>1</sup>H NMR (400 MHz, CDCl<sub>3</sub>) δ: 7.92 (t, *J* = 9.2 Hz, 4H), 7.26–7.24 (m, 2H), 7.19 (d, *J* = 7.6 Hz, 2H), 6.75–6.72 (m, 1H), 5.74 (s, 1H), 4.58–4.55 (m, 1H), 4.53–4.49 (m, 1H), 3.34 (s, 3H), 3.06–2.99 (m, 1H), 2.65 (q, *J* = 7.1 Hz, 2H), 2.49–2.39 (m, 8H), 1.21 (t, *J* = 7.3 Hz, 3H); <sup>13</sup>C NMR (100 MHz, CDCl<sub>3</sub>) δ: 166.2, 166.0, 155.7, 149.3, 147.1, 144.2, 143.8, 129.7, 129.7, 129.2, 129.0, 126.9, 126.6, 86.5, 81.9, 75.0, 64.4, 34.9, 27.2, 24.0, 21.7, 21.6, 10.3; HRMS (ESI): *m/z* calcd for C<sub>27</sub>H<sub>29</sub>N<sub>3</sub>NaO<sub>7</sub><sup>+</sup> [M+Na]<sup>+</sup> 530.1898. Found 530.1894.

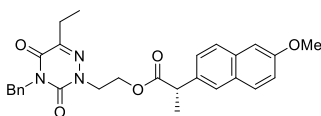

2-(4-benzyl-6-ethyl-3,5-dioxo-4,5-dihydro-1,2,4-triazin-2(3H)-yl)ethyl (S)-2-(6-methoxynaphthalen-2-yl)propanoate (**3v**). a colorless liquid (37% yield, 54.1 mg). (PET/EtOAc = 25:1 as the eluent). <sup>1</sup>H NMR (400 MHz, CDCl<sub>3</sub>) δ: 7.68–7.63 (m, 2H), 7.58 (s, 1H), 7.40–7.31 (m, 6H), 7.14–7.10 (m, 2H), 4.99 (s, 2H), 4.45–4.38 (m, 1H), 4.31–4.21 (m, 2H), 4.16–4.09 (m, 1H), 3.91 (s, 3H), 3.72 (q, *J* = 7.2 Hz, 1H), 2.54 (q, *J* = 7.4 Hz, 2H), 3.72 (d, *J* = 7.1 Hz, 3H), 1.16 (t, *J* = 7.3 Hz, 3H); <sup>13</sup>C NMR (100 MHz, CDCl<sub>3</sub>) δ: 174.4, 157.6, 155.9, 148.8, 146.1, 135.9, 135.4, 133.6, 129.2, 128.8, 128.7, 128.6, 128.1, 127.0, 126.2, 125.9, 118.9, 105.5, 61.0, 55.3, 55.1, 45.3, 39.6, 23.6, 18.4, 10.3; HRMS (ESI): *m/z* calcd for C<sub>28</sub>H<sub>30</sub>N<sub>3</sub>O<sub>5</sub><sup>+</sup> [M+H]<sup>+</sup> 488.2180. Found 488.2176.

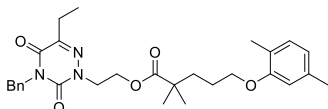

2-(4-benzyl-6-ethyl-3,5-dioxo-4,5-dihydro-1,2,4-triazin-2(3H)-yl)ethyl 5-(2,5-dimethylphenoxy)-2,2-dimethylpentanoate (**3w**). a colorless liquid (43% yield, 65.4 mg). (PET/EtOAc = 25:1 as the eluent). <sup>1</sup>H NMR (400 MHz, CDCl<sub>3</sub>) δ: 7.40–7.39 (m, 2H), 7.35–7.31 (m, 3H), 7.00 (d, *J* = 7.0 Hz, 1H), 6.65 (d, *J* = 7.2 Hz, 1H), 6.59 (s, 1H), 5.08 (s, 2H), 4.32–4.31 (m, 2H), 4.24–4.23 (m, 2H), 3.88–3.85 (m, 2H), 2.63 (q, *J* = 7.2 Hz, 2H), 2.31 (s, 3H), 2.16 (s, 3H), 1.66–1.65 (m, 2H), 1.28 (d, *J* = 10.7 Hz, 2H), 1.20–1.17 (m, 3H), 1.13 (s, 6H); <sup>13</sup>C NMR (100 MHz, CDCl<sub>3</sub>) δ: 177.6, 157.0, 156.1, 148.9, 146.3, 136.5, 135.9, 130.3, 128.8, 128.7, 128.2, 123.6, 120.7, 112.0, 67.9, 60.8, 55.2, 42.0, 39.8, 36.9, 29.8, 25.1, 25.0, 23.9, 21.5, 15.8, 10.5; HRMS (ESI): *m/z* calcd for C<sub>29</sub>H<sub>38</sub>N<sub>3</sub>O<sub>5</sub><sup>+</sup> [M+H]<sup>+</sup> 508.2806. Found 508.2805.

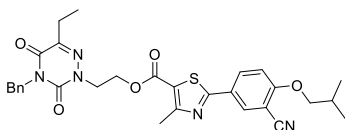

2-(4-benzyl-6-ethyl-3,5-dioxo-4,5-dihydro-1,2,4-triazin-2(3H)-yl)ethyl 2-(3-cyano-4-isobutoxyphenyl)-4-methylthiazole-5-carboxylate (**3x**). a colorless liquid (19% yield, 32.7 mg). (PET/EtOAc = 25:1 as the eluent). <sup>1</sup>H NMR (400 MHz, CDCl<sub>3</sub>) δ: 8.13 (s, 1H), 8.07 (d, *J* = 8.8 Hz, 1H), 8.38–7.34 (m, 3H), 7.30–7.27 (m, 2H), 7.01 (d, *J* = 8.9 Hz, 1H), 5.09 (s, 2H), 4.55–4.53 (m, 2H), 4.36–4.34 (m, 2H), 3.91–3.90 (m, 2H), 2.70 (s, 3H), 2.64 (q, *J* = 7.3 Hz, 2H), 2.24–2.18 (m, 1H), 1.18 (t, *J* = 7.4 Hz, 3H), 1.10 (t, *J* = 6.7 Hz, 6H); <sup>13</sup>C NMR (100 MHz, CDCl<sub>3</sub>) δ: 167.5, 162.5, 161.7, 161.7, 156.0, 148.9, 146.4, 135.7, 132.6, 132.1, 128.6, 128.1, 126.0, 121.1, 115.4, 112.6, 103.0, 75.7, 61.6, 55.1, 39.7, 28.1, 23.9, 19.0, 17.4, 10.4; HRMS (ESI): *m/z* calcd for C<sub>30</sub>H<sub>32</sub>N<sub>5</sub>O<sub>5</sub>S<sup>+</sup> [M+H]<sup>+</sup> 574.2119. Found 574.2119.

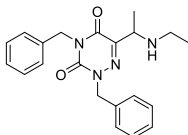

2,4-dibenzyl-6-(1-(ethylamino)ethyl)-1,2,4-triazine-3,5(2H,4H)-dione (**4a**). a yellow liquid (79% yield, 86.3 mg). (PET/EtOAc = 1:1 as the eluent). <sup>1</sup>H NMR (400 MHz, CDCl<sub>3</sub>) δ: 7.48–7.46 (m, 2H), 7.40–7.38 (m, 2H), 7.34–7.30 (m, 6H), 5.18–5.02 (m, 4H), 3.98 (q, *J* = 6.4 Hz, 1H), 2.52–2.51 (m, 2H), 1.84 (s, 1H), 1.36 (d, *J* = 6.6 Hz, 3H), 1.06 (t, *J* = 7.0 Hz, 3H); <sup>13</sup>C NMR (100 MHz, CDCl<sub>3</sub>) δ: 155.4, 148.7, 146.8, 135.6, 135.5, 129.3, 128.6, 128.6, 128.5, 128.2, 128.0, 55.2, 53.3, 44.0, 41.4, 19.6, 15.3; HRMS (ESI): *m/z* calcd for C<sub>21</sub>H<sub>25</sub>N<sub>4</sub>O<sub>2</sub><sup>+</sup> [M+H]<sup>+</sup> 365.1972. Found 365.1972.

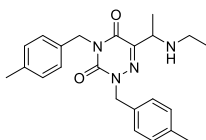

6-(1-(ethylamino)ethyl)-2,4-bis(4-methylbenzyl)-1,2,4-triazine-3,5(2H,4H)-dione (**4b**). a yellow liquid (74% yield, 86.9 mg). (PET/EtOAc = 1:1 as the eluet).  $^1\text{H}$  NMR (400 MHz,  $\text{CDCl}_3$ )  $\delta$ : 7.38–7.36 (m, 2H), 7.29–7.26 (m, 2H), 7.13 (t,  $J$  = 8.1 Hz, 4H), 5.13–4.98 (m, 4H), 3.96 (q,  $J$  = 6.4 Hz, 1H), 2.51 (q,  $J$  = 6.8 Hz, 2H), 2.33 (s, 3H), 2.32 (s, 3H), 1.87 (s, 1H), 1.34 (d,  $J$  = 6.4 Hz, 3H), 1.06 (t,  $J$  = 6.8 Hz, 3H);  $^{13}\text{C}$  NMR (100 MHz,  $\text{CDCl}_3$ )  $\delta$ : 155.5, 148.7, 146.6, 137.9, 137.8, 132.6, 129.4, 129.3, 129.2, 128.6, 55.0, 53.3, 43.8, 41.4, 21.1, 19.6, 15.2; HRMS (ESI):  $m/z$  calcd for  $\text{C}_{23}\text{H}_{29}\text{N}_4\text{O}_2^+$   $[\text{M}+\text{H}]^+$  393.2285. Found 393.2284.

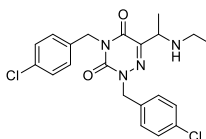

2,4-bis(4-chlorobenzyl)-6-(1-(ethylamino)ethyl)-1,2,4-triazine-3,5(2H,4H)-dione (**4c**). a yellow liquid (64% yield, 82.6 mg). (PET/EtOAc = 1:1 as the eluet).  $^1\text{H}$  NMR (400 MHz,  $\text{CDCl}_3$ )  $\delta$ : 7.41–7.39 (m, 2H), 7.31–7.27 (m, 6H), 5.12–4.99 (m, 4H), 3.96 (q,  $J$  = 6.6 Hz, 1H), 2.58–2.47 (m, 2H), 1.83 (s, 1H), 1.35 (d,  $J$  = 6.7 Hz, 3H), 1.07 (t,  $J$  = 7.1 Hz, 3H);  $^{13}\text{C}$  NMR (100 MHz,  $\text{CDCl}_3$ )  $\delta$ : 155.3, 148.6, 147.1, 134.3, 134.1, 133.9, 133.9, 130.9, 130.1, 128.9, 128.7, 54.6, 53.3, 43.4, 41.5, 19.5, 15.3; HRMS (ESI):  $m/z$  calcd for  $\text{C}_{21}\text{H}_{23}\text{Cl}_2\text{N}_4\text{O}_2^+$   $[\text{M}+\text{H}]^+$  433.1193. Found 433.1190.

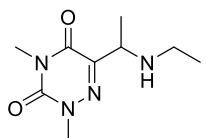

6-(1-(ethylamino)ethyl)-2,4-dimethyl-1,2,4-triazine-3,5(2H,4H)-dione (**4d**). a yellow liquid (74% yield, 47.2 mg). (PET/EtOAc = 1:1 as the eluet).  $^1\text{H}$  NMR (400 MHz,  $\text{CDCl}_3$ )  $\delta$ : 3.99 (q,  $J$  = 6.5 Hz, 1H), 3.61 (s, 3H), 3.32 (s, 3H), 2.89 (s, 1H), 2.62–2.60 (m, 2H), 1.38 (d,  $J$  = 6.5 Hz, 3H), 1.11 (t,  $J$  = 6.7 Hz, 3H);  $^{13}\text{C}$  NMR (100 MHz,  $\text{CDCl}_3$ )  $\delta$ : 155.8, 149.0, 145.2, 53.3, 41.5, 39.5, 27.0, 19.1, 14.8; HRMS (ESI):  $m/z$  calcd for  $\text{C}_9\text{H}_{17}\text{N}_4\text{O}_2^+$   $[\text{M}+\text{H}]^+$  213.1346. Found 213.1345.

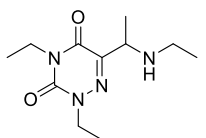

2,4-diethyl-6-(1-(ethylamino)ethyl)-1,2,4-triazine-3,5(2H,4H)-dione (**4e**). a yellow liquid (65% yield, 47.3 mg). (PET/EtOAc = 1:1 as the eluet).  $^1\text{H}$  NMR (400 MHz,  $\text{CDCl}_3$ )  $\delta$ : 4.04–3.99 (m, 1H), 3.97–3.93 (m, 4H), 2.59–2.54 (m, 2H), 1.94 (s, 1H), 1.35 (d,  $J$  = 6.7 Hz, 3H), 1.30 (t,  $J$  = 7.1 Hz, 3H), 1.22 (t,  $J$  = 7.0 Hz, 3H), 1.08 (t,  $J$  = 7.1 Hz, 3H);  $^{13}\text{C}$  NMR (100 MHz,  $\text{CDCl}_3$ )  $\delta$ : 155.4, 148.3, 146.2, 53.4, 46.7, 41.5, 36.0, 19.4, 15.2, 13.3, 12.5; HRMS (ESI):  $m/z$  calcd for  $\text{C}_{11}\text{H}_{21}\text{N}_4\text{O}_2^+$   $[\text{M}+\text{H}]^+$  241.1659. Found 241.1658.

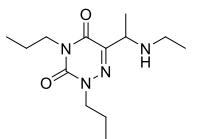

6-(1-(ethylamino)ethyl)-2,4-dipropyl-1,2,4-triazine-3,5(2H,4H)-dione (**4f**). a yellow liquid (68% yield, 54.6 mg). (PET/EtOAc = 1:1 as the eluent). <sup>1</sup>H NMR (400 MHz, CDCl<sub>3</sub>) δ: 3.95-3.91 (m, 1H), 3.89-3.83 (m, 4H), 2.54 (q, *J* = 6.6 Hz, 2H), 2.02 (s, 1H), 1.73 (t, *J* = 7.3 Hz, 2H), 1.63 (t, *J* = 7.4 Hz, 2H), 1.31 (d, *J* = 6.7 Hz, 3H), 1.06 (t, *J* = 7.1 Hz, 3H), 0.91 (t, *J* = 7.4 Hz, 6H); <sup>13</sup>C NMR (100 MHz, CDCl<sub>3</sub>) δ: 155.5, 148.7, 146.1, 53.4, 53.0, 42.2, 41.4, 21.4, 20.5, 19.4, 15.3, 11.2, 10.8; HRMS (ESI): *m/z* calcd for C<sub>13</sub>H<sub>25</sub>N<sub>4</sub>O<sub>2</sub><sup>+</sup> [M+H]<sup>+</sup> 269.1972. Found 269.1973.

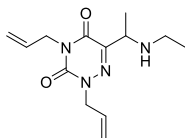

2,4-diallyl-6-(1-(ethylamino)ethyl)-1,2,4-triazine-3,5(2H,4H)-dione (**4g**). a yellow liquid (63% yield, 49.7 mg). (PET/EtOAc = 1:1 as the eluent). <sup>1</sup>H NMR (400 MHz, CDCl<sub>3</sub>) δ: 5.96-5.80 (m, 2H), 5.29-5.20 (m, 4H), 4.60-4.50 (m, 4H), 3.95 (q, *J* = 6.4 Hz, 1H), 2.58-2.53 (m, 2H), 1.90 (s, 1H), 1.35 (d, *J* = 6.7 Hz, 3H), 1.07 (t, *J* = 7.0 Hz, 3H); <sup>13</sup>C NMR (100 MHz, CDCl<sub>3</sub>) δ: 155.2, 148.3, 146.7, 131.3, 130.3, 119.1, 118.9, 53.9, 53.5, 42.8, 41.5, 19.5, 15.3; HRMS (ESI): *m/z* calcd for C<sub>13</sub>H<sub>21</sub>N<sub>4</sub>O<sub>2</sub><sup>+</sup> [M+H]<sup>+</sup> 265.1659. Found 265.1661.

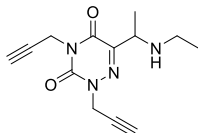

6-(1-(ethylamino)ethyl)-2,4-di(prop-2-yn-1-yl)-1,2,4-triazine-3,5(2H,4H)-dione (**4h**). a yellow liquid (66% yield, 51.4 mg). (PET/EtOAc = 1:1 as the eluent). <sup>1</sup>H NMR (400 MHz, CDCl<sub>3</sub>) δ: 4.80-4.68 (m, 4H), 3.99 (q, *J* = 6.1 Hz, 1H), 2.59 (q, *J* = 6.7 Hz, 2H), 2.35 (s, 1H), 2.22 (s, 1H), 1.83 (s, 1H), 1.39 (d, *J* = 6.6 Hz, 3H), 1.09 (t, *J* = 6.9 Hz, 3H); <sup>13</sup>C NMR (100 MHz, CDCl<sub>3</sub>) δ: 154.5, 147.5, 147.4, 76.4, 73.5, 71.8, 53.5, 41.5, 41.3, 29.9, 19.5, 15.3; HRMS (ESI): *m/z* calcd for C<sub>13</sub>H<sub>17</sub>N<sub>4</sub>O<sub>2</sub><sup>+</sup> [M+H]<sup>+</sup> 261.1346. Found 261.1341.

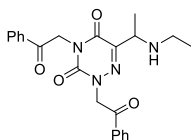

6-(1-(ethylamino)ethyl)-2,4-bis(2-oxo-2-phenylethyl)-1,2,4-triazine-3,5(2H,4H)-dione (**4i**). a yellow liquid (66% yield, 83.7 mg). (PET/EtOAc = 1:1 as the eluent). <sup>1</sup>H NMR (400 MHz, CDCl<sub>3</sub>) δ: 7.99-7.95 (m, 4H), 7.64-7.59 (m, 2H), 7.51-7.47 (m, 4H), 5.43-5.38 (m, 4H), 4.00 (q, *J* = 6.7 Hz, 1H), 2.65-2.56 (m, 2H), 2.17 (s, 1H), 1.39 (d, *J* = 6.7 Hz, 3H), 1.08 (t, *J* = 7.1 Hz, 3H); <sup>13</sup>C NMR (100 MHz, CDCl<sub>3</sub>) δ: 191.5, 190.3, 155.3, 148.9, 147.3, 134.4, 134.3, 134.1, 134.0, 128.9, 128.8, 128.1, 128.0, 57.4, 53.5, 46.4, 41.4, 19.5, 15.3; HRMS (ESI): *m/z* calcd for C<sub>23</sub>H<sub>25</sub>N<sub>4</sub>O<sub>4</sub><sup>+</sup> [M+H]<sup>+</sup> 421.1870. Found 421.1870.

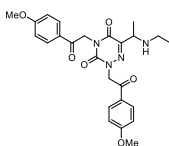

6-(1-(ethylamino)ethyl)-2,4-bis(2-(4-methoxyphenyl)-2-oxoethyl)-1,2,4-triazine-3,5(2H,4H)-dione (**4j**). a yellow liquid (64% yield, 92.0 mg). (PET/EtOAc = 1:1 as the eluent). <sup>1</sup>H NMR (400 MHz, CDCl<sub>3</sub>) δ: 7.97-7.92 (m, 4H), 6.96-6.94 (m, 4H), 5.37-5.33 (m, 4H), 3.99 (q, *J* = 6.3 Hz, 1H), 3.86 (s, 6H),

2.65-2.55 (m, 2H), 2.06 (s, 1H), 1.39 (d,  $J = 6.6$  Hz, 3H), 1.07 (t,  $J = 7.0$  Hz, 3H);  $^{13}\text{C}$  NMR (100 MHz,  $\text{CDCl}_3$ )  $\delta$ : 190.0, 188.8, 164.3, 155.4, 149.1, 147.2, 130.5, 130.4, 127.6, 127.4, 114.2, 114.1, 57.2, 55.6, 53.6, 46.2, 41.5, 19.6, 15.4; HRMS (ESI):  $m/z$  calcd for  $\text{C}_{25}\text{H}_{29}\text{N}_4\text{O}_6^+$   $[\text{M}+\text{H}]^+$  481.2082. Found 481.2076.

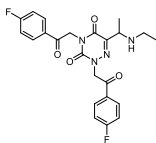

*6-(1-(ethylamino)ethyl)-2,4-bis(2-(4-fluorophenyl)-2-oxoethyl)-1,2,4-triazine-3,5(2H,4H)-dione* (**4k**). a yellow liquid (62% yield, 85.3 mg). (PET/EtOAc = 1:1 as the eluet).  $^1\text{H}$  NMR (400 MHz,  $\text{CDCl}_3$ )  $\delta$ : 8.03-7.97 (m, 4H), 7.19-7.14 (m, 4H), 5.39-5.34 (m, 4H), 3.99 (q,  $J = 6.3$  Hz, 1H), 2.61-2.58 (m, 2H), 2.19 (s, 1H), 1.38 (d,  $J = 6.6$  Hz, 3H), 1.07 (t,  $J = 6.9$  Hz, 3H);  $^{13}\text{C}$  NMR (100 MHz,  $\text{CDCl}_3$ )  $\delta$ : 189.9, 188.7, 167.5, 167.5, 164.9, 164.9, 155.2, 148.9, 147.3, 130.8(d,  $J = 9.6$  Hz), 116.2(d,  $J = 8.3$  Hz), 116.0(d,  $J = 8.4$  Hz), 57.2, 53.5, 46.2, 41.4, 19.5, 15.2; HRMS (ESI):  $m/z$  calcd for  $\text{C}_{23}\text{H}_{23}\text{F}_2\text{N}_4\text{O}_4^+$   $[\text{M}+\text{H}]^+$  457.1682. Found 457.1681.

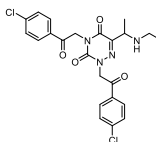

*2,4-bis(2-(4-chlorophenyl)-2-oxoethyl)-6-(1-(ethylamino)ethyl)-1,2,4-triazine-3,5(2H,4H)-dione* (**4l**). a yellow liquid (61% yield, 89.7 mg). (PET/EtOAc = 1:1 as the eluet).  $^1\text{H}$  NMR (400 MHz,  $\text{CDCl}_3$ )  $\delta$ : 7.94-7.89 (m, 4H), 7.49-7.47 (m, 4H), 5.39-5.34 (m, 4H), 4.00 (q,  $J = 6.5$  Hz, 1H), 2.64-2.57 (m, 2H), 1.79 (s, 1H), 1.39 (d,  $J = 6.7$  Hz, 3H), 1.08 (t,  $J = 7.0$  Hz, 3H);  $^{13}\text{C}$  NMR (100 MHz,  $\text{CDCl}_3$ )  $\delta$ : 190.3, 189.2, 155.2, 148.9, 147.5, 140.7, 140.7, 132.7, 132.6, 129.5, 129.4, 129.3, 129.3, 57.3, 53.6, 46.3, 41.5, 19.6, 15.3; HRMS (ESI):  $m/z$  calcd for  $\text{C}_{23}\text{H}_{23}\text{Cl}_2\text{N}_4\text{O}_4^+$   $[\text{M}+\text{H}]^+$  489.1091. Found 489.1083.

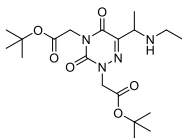

*di-tert-butyl 2,2'-(6-(1-(ethylamino)ethyl)-3,5-dioxo-1,2,4-triazine-2,4(3H,5H)-diyl)diacetate* (**4m**). a yellow liquid (41% yield, 50.9 mg). (PET/EtOAc = 1:1 as the eluet).  $^1\text{H}$  NMR (400 MHz,  $\text{CDCl}_3$ )  $\delta$ : 4.62-4.54 (m, 4H), 4.00 (q,  $J = 6.5$  Hz, 1H), 2.60-2.51 (m, 2H), 1.85 (s, 1H), 1.44 (s, 18H), 1.35 (d,  $J = 6.5$  Hz, 3H), 1.06 (t,  $J = 6.1$  Hz, 3H);  $^{13}\text{C}$  NMR (100 MHz,  $\text{CDCl}_3$ )  $\delta$ : 166.2, 165.4, 155.0, 148.5, 147.0, 82.9, 82.8, 53.5, 53.3, 42.0, 41.4, 27.9, 27.9, 19.6, 15.2; HRMS (ESI):  $m/z$  calcd for  $\text{C}_{19}\text{H}_{33}\text{N}_4\text{O}_6^+$   $[\text{M}+\text{H}]^+$  413.2395. Found 413.2394.

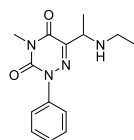

*6-(1-(ethylamino)ethyl)-4-methyl-2-phenyl-1,2,4-triazine-3,5(2H,4H)-dione* (**4n**). a yellow liquid (71% yield, 58.4 mg). (PET/EtOAc = 1:1 as the eluet).  $^1\text{H}$  NMR (400 MHz,  $\text{CDCl}_3$ )  $\delta$ : 7.51-7.43 (m, 3H), 7.22-7.20(m, 2H), 4.00 (q,  $J = 6.3$  Hz, 1H), 3.66 (s, 3H), 2.66-2.63 (m, 2H), 1.93 (s, 1H), 1.39 (d,  $J = 6.3$  Hz, 3H), 1.11 (t,  $J = 6.6$  Hz, 3H);  $^{13}\text{C}$  NMR (100 MHz,  $\text{CDCl}_3$ )  $\delta$ : 155.6, 148.7, 146.9, 132.9, 129.5, 129.3, 127.7, 53.6, 41.5, 39.5, 19.3, 15.2; HRMS (ESI):  $m/z$  calcd for  $\text{C}_{14}\text{H}_{19}\text{N}_4\text{O}_2^+$   $[\text{M}+\text{H}]^+$



275.1503. Found 275.1504.

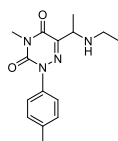

6-(1-(ethylamino)ethyl)-4-methyl-2-(p-tolyl)-1,2,4-triazine-3,5(2H,4H)-dione (**4o**). a yellow liquid (77% yield, 66.3 mg). (PET/EtOAc = 1:1 as the eluent). <sup>1</sup>H NMR (400 MHz, CDCl<sub>3</sub>) δ: 7.31-7.29 (m, 2H), 7.10-7.08 (m, 2H), 3.99 (q, *J* = 6.6 Hz, 1H), 3.66 (s, 3H), 2.65-2.63 (m, 2H), 2.39 (s, 3H), 1.94 (s, 1H), 1.40 (d, *J* = 6.7 Hz, 3H), 1.11 (t, *J* = 6.9 Hz, 3H); <sup>13</sup>C NMR (100 MHz, CDCl<sub>3</sub>) δ: 155.7, 148.7, 147.0, 139.4, 130.2, 130.1, 127.4, 53.6, 41.5, 39.5, 21.2, 19.3, 15.3; HRMS (ESI): *m/z* calcd for C<sub>15</sub>H<sub>21</sub>N<sub>4</sub>O<sub>2</sub><sup>+</sup> [M+H]<sup>+</sup> 289.1659. Found 289.1653.

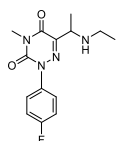

6-(1-(ethylamino)ethyl)-2-(4-fluorophenyl)-4-methyl-1,2,4-triazine-3,5(2H,4H)-dione (**4p**). a yellow liquid (56% yield, 48.7 mg). (PET/EtOAc = 1:1 as the eluent). <sup>1</sup>H NMR (400 MHz, CDCl<sub>3</sub>) δ: 7.20-7.18 (m, 4H), 3.99 (q, *J* = 6.6 Hz, 1H), 3.66 (s, 3H), 2.68-2.59 (m, 2H), 1.82 (s, 1H), 1.40 (d, *J* = 6.6 Hz, 3H), 1.11 (t, *J* = 7.0 Hz, 3H); <sup>13</sup>C NMR (100 MHz, CDCl<sub>3</sub>) δ: 163.9, 161.4, 155.6, 148.7, 147.1, 129.7 (d, *J* = 8.9 Hz), 128.6 (d, *J* = 3.2 Hz), 116.6, 116.4, 53.6, 41.6, 39.5, 19.4, 15.3; HRMS (ESI): *m/z* calcd for C<sub>14</sub>H<sub>18</sub>FN<sub>4</sub>O<sub>2</sub><sup>+</sup> [M+H]<sup>+</sup> 293.1408. Found 293.1408.

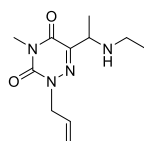

2-allyl-6-(1-(ethylamino)ethyl)-4-methyl-1,2,4-triazine-3,5(2H,4H)-dione (**4q**). a yellow liquid (64% yield, 45.6 mg). (PET/EtOAc = 1:1 as the eluent). <sup>1</sup>H NMR (400 MHz, CDCl<sub>3</sub>) δ: 5.90-5.81 (m, 1H), 5.31-5.22 (m, 2H), 4.53 (d, *J* = 5.5 Hz, 2H), 3.96 (q, *J* = 6.6 Hz, 1H), 3.62 (s, 3H), 2.63-2.54 (m, 2H), 1.78 (s, 1H), 1.36 (d, *J* = 6.6 Hz, 3H), 1.09 (t, *J* = 7.0 Hz, 3H); <sup>13</sup>C NMR (100 MHz, CDCl<sub>3</sub>) δ: 155.4, 148.7, 146.5, 130.3, 119.2, 53.4, 42.8, 41.5, 39.4, 19.5, 15.3; HRMS (ESI): *m/z* calcd for C<sub>11</sub>H<sub>19</sub>N<sub>4</sub>O<sub>2</sub><sup>+</sup> [M+H]<sup>+</sup> 239.1503. Found 239.1500.

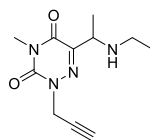

6-(1-(ethylamino)ethyl)-4-methyl-2-(prop-2-yn-1-yl)-1,2,4-triazine-3,5(2H,4H)-dione (**4r**). a yellow liquid (77% yield, 54.8 mg). (PET/EtOAc = 1:1 as the eluent). <sup>1</sup>H NMR (400 MHz, CDCl<sub>3</sub>) δ: 4.65 (s, 2H), 3.94 (q, *J* = 6.2 Hz, 1H), 3.61 (s, 3H), 2.57-2.54 (m, 2H), 2.19 (s, 1H), 1.86 (s, 1H), 1.34 (d, *J* = 6.2 Hz, 3H), 1.06 (t, *J* = 6.7 Hz, 3H); <sup>13</sup>C NMR (100 MHz, CDCl<sub>3</sub>) δ: 154.6, 148.0, 146.4, 76.6, 71.5, 53.3, 41.4, 39.3, 29.7, 19.3, 15.2; HRMS (ESI): *m/z* calcd for C<sub>11</sub>H<sub>17</sub>N<sub>4</sub>O<sub>2</sub><sup>+</sup> [M+H]<sup>+</sup> 237.1346. Found 237.1347.

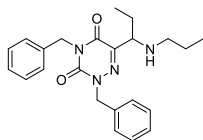

*2,4-dibenzyl-6-(1-(propylamino)propyl)-1,2,4-triazine-3,5(2H,4H)-dione (4s)*. a yellow liquid (67% yield, 79.2 mg). (PET/EtOAc = 1:1 as the eluet). <sup>1</sup>H NMR (400 MHz, CDCl<sub>3</sub>) δ: 7.46–7.45 (m, 2H), 7.39–7.37 (m, 2H), 7.34–7.28 (m, 6H), 5.18–5.04 (m, 4H), 3.75 (t, *J* = 6.5 Hz, 1H), 2.39 (t, *J* = 6.6 Hz, 2H), 1.82 (s, 1H), 1.82–1.67 (m, 2H), 1.51–1.35 (m, 2H), 0.89–0.83 (m, 6H); <sup>13</sup>C NMR (100 MHz, CDCl<sub>3</sub>) δ: 155.6, 148.7, 146.1, 135.6, 135.6, 129.2, 128.6, 128.5, 128.1, 127.9, 59.4, 55.2, 49.3, 44.0, 26.4, 23.3, 11.6, 10.4; HRMS (ESI): *m/z* calcd for C<sub>23</sub>H<sub>29</sub>N<sub>4</sub>O<sub>2</sub><sup>+</sup> [M+H]<sup>+</sup> 393.2285. Found 393.2286.

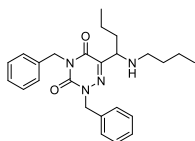

*2,4-dibenzyl-6-(1-(butylamino)butyl)-1,2,4-triazine-3,5(2H,4H)-dione (4t)*. a yellow liquid (63% yield, 78.8 mg). (PET/EtOAc = 1:1 as the eluet). <sup>1</sup>H NMR (400 MHz, CDCl<sub>3</sub>) δ: 7.46–7.44 (m, 2H), 7.38–7.28 (m, 8H), 5.18–5.04 (m, 4H), 3.80 (t, *J* = 6.6 Hz, 1H), 2.42 (t, *J* = 7.0 Hz, 2H), 1.82 (s, 1H), 1.77–1.60 (m, 2H), 1.46–1.36 (m, 2H), 1.34–1.22 (m, 4H), 0.91–0.84 (m, 6H); <sup>13</sup>C NMR (100 MHz, CDCl<sub>3</sub>) δ: 155.6, 148.7, 146.4, 135.6, 135.6, 129.2, 128.6, 128.5, 128.1, 127.9, 58.2, 55.1, 47.1, 44.0, 35.7, 32.3, 20.3, 19.3, 13.9, 13.8; HRMS (ESI): *m/z* calcd for C<sub>25</sub>H<sub>33</sub>N<sub>4</sub>O<sub>2</sub><sup>+</sup> [M+H]<sup>+</sup> 421.2598. Found 421.2596.

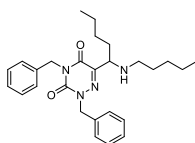

*2,4-dibenzyl-6-(1-(pentylamino)pentyl)-1,2,4-triazine-3,5(2H,4H)-dione (4u)*. a yellow liquid (38% yield, 50.7 mg). (PET/EtOAc = 1:1 as the eluet). <sup>1</sup>H NMR (400 MHz, CDCl<sub>3</sub>) δ: 7.45–7.43 (m, 2H), 7.38–7.29 (m, 8H), 5.17–5.04 (m, 4H), 3.79 (t, *J* = 6.6 Hz, 1H), 2.45–2.39 (m, 2H), 1.76 (s, 1H), 1.71–1.65 (m, 4H), 1.29–1.19 (m, 8H), 0.88–0.83 (m, 6H); <sup>13</sup>C NMR (100 MHz, CDCl<sub>3</sub>) δ: 155.6, 148.7, 146.2, 135.7, 135.6, 129.2, 128.7, 128.6, 128.2, 128.0, 58.5, 58.4, 55.2, 47.5, 44.0, 33.3, 29.8, 29.4, 28.3, 22.5, 14.0, 14.0; HRMS (ESI): *m/z* calcd for C<sub>27</sub>H<sub>37</sub>N<sub>4</sub>O<sub>2</sub><sup>+</sup> [M+H]<sup>+</sup> 449.2911. Found 449.2904.

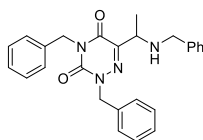

*2,4-dibenzyl-6-(1-(benzylamino)ethyl)-1,2,4-triazine-3,5(2H,4H)-dione (4v)*. a yellow liquid (30% yield, 38.7 mg). (PET/EtOAc = 1:1 as the eluet). <sup>1</sup>H NMR (400 MHz, CDCl<sub>3</sub>) δ: 7.49–7.47 (m, 2H), 7.42–7.40 (m, 2H), 7.36–7.31 (m, 6H), 7.17–7.15 (m, 5H), 5.13–5.02 (m, 2H), 4.00 (q, *J* = 6.4 Hz, 1H), 3.67 (q, *J* = 13.2 Hz, 2H), 2.03 (s, 1H), 1.39 (q, *J* = 6.6 Hz, 1H); <sup>13</sup>C NMR (100 MHz, CDCl<sub>3</sub>) δ: 155.3, 148.7, 146.8, 140.0, 135.6, 135.5, 129.4, 128.7, 128.7, 128.5, 128.5, 128.2, 128.0, 126.8, 126.8, 55.2, 53.6, 51.5, 44.0, 19.7; HRMS (ESI): *m/z* calcd for C<sub>26</sub>H<sub>27</sub>N<sub>4</sub>O<sub>2</sub><sup>+</sup> [M+H]<sup>+</sup> 427.2129. Found 427.2130.

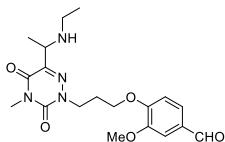

4-(3-(6-(1-(ethylamino)ethyl)-4-methyl-3,5-dioxo-4,5-dihydro-1,2,4-triazin-2(3H)-yl)propoxy)-3-methoxybenzaldehyde (**4w**). a yellow liquid (47% yield, 36.7 mg). (PET/EtOAc = 1:1 as the eluent).  $^1\text{H}$  NMR (400 MHz,  $\text{CDCl}_3$ )  $\delta$ : 9.81 (s, 1H), 7.40 (d,  $J = 7.9$  Hz, 1H), 7.35 (s, 1H), 6.90 (d,  $J = 8.1$  Hz, 1H), 4.16 (t,  $J = 6.0$  Hz, 4H), 3.92 (q,  $J = 6.5$  Hz, 1H), 3.84 (s, 3H), 3.57 (s, 3H), 2.58–2.54 (m, 2H), 2.37 (s, 1H), 2.28–2.22 (m, 2H), 1.31 (d,  $J = 6.7$  Hz, 3H), 1.06 (t,  $J = 7.0$  Hz, 3H);  $^{13}\text{C}$  NMR (100 MHz,  $\text{CDCl}_3$ )  $\delta$ : 190.9, 155.8, 153.6, 149.6, 148.9, 145.8, 130.0, 126.8, 111.3, 109.0, 67.2, 55.8, 53.4, 41.4, 39.4, 38.6, 19.2, 15.1; HRMS (ESI):  $m/z$  calcd for  $\text{C}_{19}\text{H}_{27}\text{N}_4\text{O}_5^+$   $[\text{M}+\text{H}]^+$  391.1976. Found 391.1975.

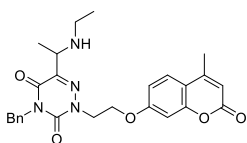

4-benzyl-6-(1-(ethylamino)ethyl)-2-(2-((4-methyl-2-oxo-2H-chromen-7-yl)oxy)ethyl)-1,2,4-triazine-3,5-dione (**4x**). a yellow liquid (33% yield, 47.1 mg). (PET/EtOAc = 1:1 as the eluent).  $^1\text{H}$  NMR (400 MHz,  $\text{CDCl}_3$ )  $\delta$ : 7.45–7.43 (m, 1H), 7.40–7.38 (m, 2H), 7.34–7.32 (m, 2H), 7.24 (s, 1H), 6.78–6.76 (m, 2H), 6.12 (s, 1H), 5.19–5.04 (m, 2H), 4.39–4.36 (m, 2H), 4.27 (d,  $J = 5.5$  Hz, 2H), 4.05 (q,  $J = 6.8$  Hz, 1H), 2.66–2.52 (m, 2H), 2.37 (s, 3H), 1.40 (d,  $J = 6.6$  Hz, 3H), 1.10 (t,  $J = 7.0$  Hz, 3H);  $^{13}\text{C}$  NMR (100 MHz,  $\text{CDCl}_3$ )  $\delta$ : 161.1, 161.1, 155.5, 155.1, 152.4, 148.5, 145.3, 135.3, 130.4, 128.7, 128.5, 128.3, 125.6, 113.9, 112.2, 101.7, 64.1, 55.4, 53.1, 41.2, 39.4, 18.9, 18.6, 14.6; HRMS (ESI):  $m/z$  calcd for  $\text{C}_{26}\text{H}_{29}\text{N}_4\text{O}_5^+$   $[\text{M}+\text{H}]^+$  477.2132. Found 477.2125.

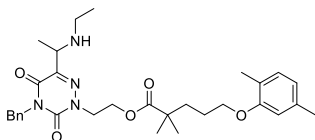

2-(4-benzyl-6-(1-(ethylamino)ethyl)-3,5-dioxo-4,5-dihydro-1,2,4-triazin-2(3H)-yl)ethyl 5-(2,5-dimethylphenoxy)-2,2-dimethylpentanoate (**4y**). a yellow liquid (62% yield, 102.3 mg). (PET/EtOAc = 1:1 as the eluent).  $^1\text{H}$  NMR (400 MHz,  $\text{CDCl}_3$ )  $\delta$ : 7.39–7.37 (m, 2H), 7.35–7.30 (m, 3H), 6.99 (d,  $J = 7.3$  Hz, 1H), 6.65 (d,  $J = 7.4$  Hz, 1H), 6.60 (s, 1H), 5.17–5.02 (m, 2H), 4.35–4.29 (m, 2H), 4.23–4.21 (m, 2H), 3.96 (q,  $J = 6.6$  Hz, 1H), 3.89–3.86 (m, 2H), 2.52 (q,  $J = 7.0$  Hz, 2H), 2.30 (s, 3H), 2.17 (s, 3H), 2.01 (s, 1H), 1.70–1.63 (m, 4H), 1.36 (d,  $J = 6.7$  Hz, 3H), 1.12 (s, 6H), 1.07 (t,  $J = 7.1$  Hz, 3H);  $^{13}\text{C}$  NMR (100 MHz,  $\text{CDCl}_3$ )  $\delta$ : 177.4, 156.8, 155.4, 148.5, 146.5, 136.3, 135.5, 130.2, 128.6, 128.6, 128.1, 123.4, 120.6, 111.8, 67.8, 60.6, 55.1, 53.4, 41.9, 41.4, 39.8, 36.8, 24.9, 24.9, 21.3, 19.6, 15.7, 15.2; HRMS (ESI):  $m/z$  calcd for  $\text{C}_{31}\text{H}_{43}\text{N}_4\text{O}_5^+$   $[\text{M}+\text{H}]^+$  551.3228. Found 551.3227.

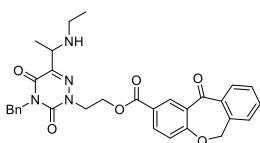

2-(4-benzyl-6-(1-(ethylamino)ethyl)-3,5-dioxo-4,5-dihydro-1,2,4-triazin-2(3H)-yl)ethyl 11-oxo-6,11-dihydro-5H-benzo[5,6]cyclohepta[1,2-b]pyridin-5-ylideneacetate (**4z**). a yellow liquid (33% yield, 47.1 mg). (PET/EtOAc = 1:1 as the eluent).

*1-dihydrodibenzo[b,e]loxepine-2-carboxylate (4z)*. a yellow liquid (46% yield, 74.6 mg). (PET/EtOAc = 1:1 as the eluent). <sup>1</sup>H NMR (400 MHz, CDCl<sub>3</sub>) δ: 8.05–8.04 (m, 1H), 7.88–7.86 (m, 1H), 7.57–7.53 (m, 1H), 7.48–7.44 (m, 1H), 7.40–7.35 (m, 5H), 7.33–7.31 (m, 2H), 7.01 (d, *J* = 8.4 Hz, 1H), 5.18–5.04 (m, 4H), 4.35–4.34 (m, 2H), 4.24–4.20 (m, 2H), 4.04–3.99 (m, 1H), 3.49 (s, 2H), 2.63–2.62 (m, 1H), 2.60–2.55 (m, 2H), 1.41–1.39 (m, 3H), 1.11–1.08 (m, 3H); <sup>13</sup>C NMR (100 MHz, CDCl<sub>3</sub>) δ: 190.8, 171.3, 160.4, 155.6, 148.7, 145.8, 140.4, 136.5, 135.5, 135.5, 132.7, 132.5, 129.5, 129.2, 128.3, 127.8, 127.4, 125.0, 121.0, 73.6, 61.2, 55.4, 53.3, 41.4, 39.7, 19.3, 14.9; HRMS (ESI): *m/z* calcd for C<sub>31</sub>H<sub>31</sub>N<sub>4</sub>O<sub>6</sub><sup>+</sup> [M+H]<sup>+</sup> 555.2238. Found 555.2234.

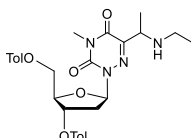

*(2R,3S,5R)-5-(6-(1-(ethylamino)ethyl)-4-methyl-3,5-dioxo-4,5-dihydro-1,2,4-triazin-2(3H)-yl)-2-(((4-methylbenzoyl)oxy)methyl)tetrahydrofuran-3-yl 4-methylbenzoate (4aa)*. a yellow liquid (30% yield, 49.5 mg). (PET/EtOAc = 1:1 as the eluent). <sup>1</sup>H NMR (400 MHz, CDCl<sub>3</sub>) δ: 7.94–7.92 (m, 2H), 7.87–7.86 (m, 2H), 7.26–7.25 (m, 2H), 7.20–7.18 (m, 2H), 6.74–6.71 (m, 1H), 5.74–5.71 (m, 1H), 4.57–4.56 (m, 1H), 4.53–4.50 (m, 1H), 3.36 (s, 3H), 3.06–3.01 (m, 1H), 2.59–2.53 (m, 2H), 2.52–2.51 (m, 1H), 2.43 (s, 3H), 2.39 (s, 3H), 1.58 (s, 1H), 1.27–1.25 (m, 3H), 1.24–1.23 (m, 2H), 0.88–0.83 (m, 3H); <sup>13</sup>C NMR (100 MHz, CDCl<sub>3</sub>) δ: 192.1, 166.2, 166.0, 152.7, 148.6, 144.5, 144.1, 137.6, 129.8, 129.6, 129.2, 129.2, 126.7, 126.3, 87.4, 82.4, 74.2, 63.7, 35.2, 29.7, 27.8, 27.5, 21.7, 21.7; HRMS (ESI): *m/z* calcd for C<sub>29</sub>H<sub>35</sub>N<sub>4</sub>O<sub>7</sub><sup>+</sup> [M+H]<sup>+</sup> 551.2500. Found 551.2502.

## X. NMR charts of 3a-4u

### 3a-<sup>1</sup>H

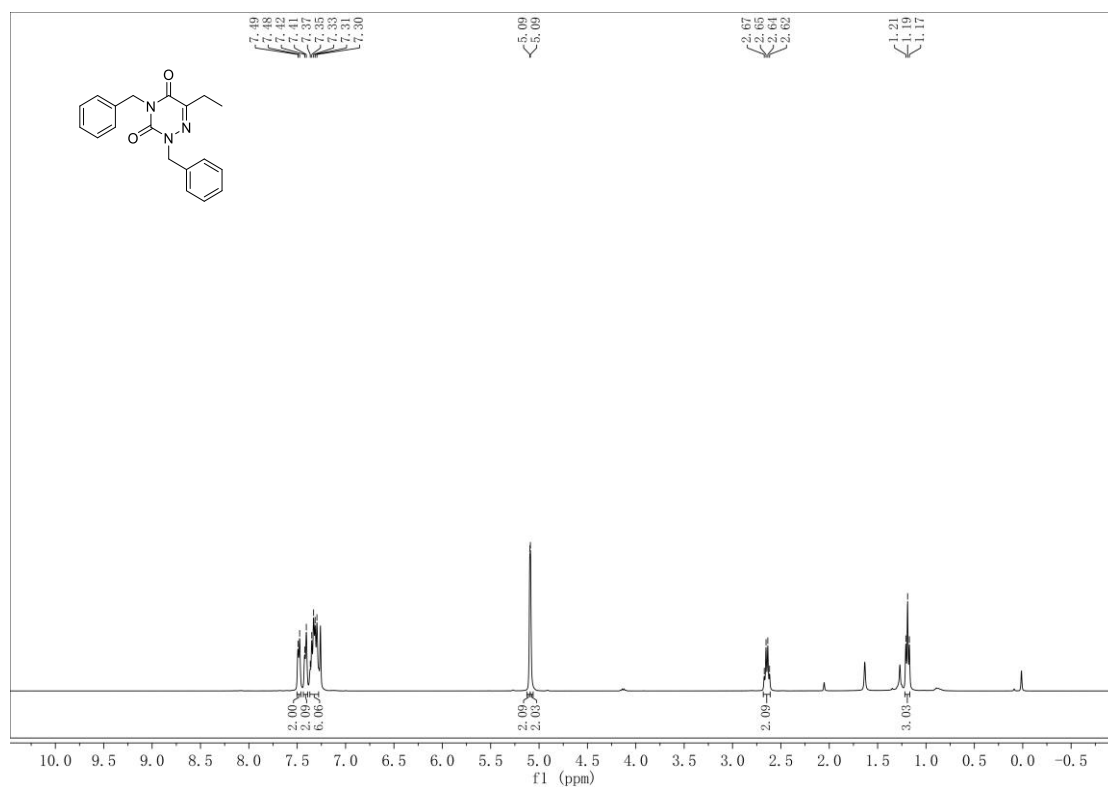

### 3a-<sup>13</sup>C

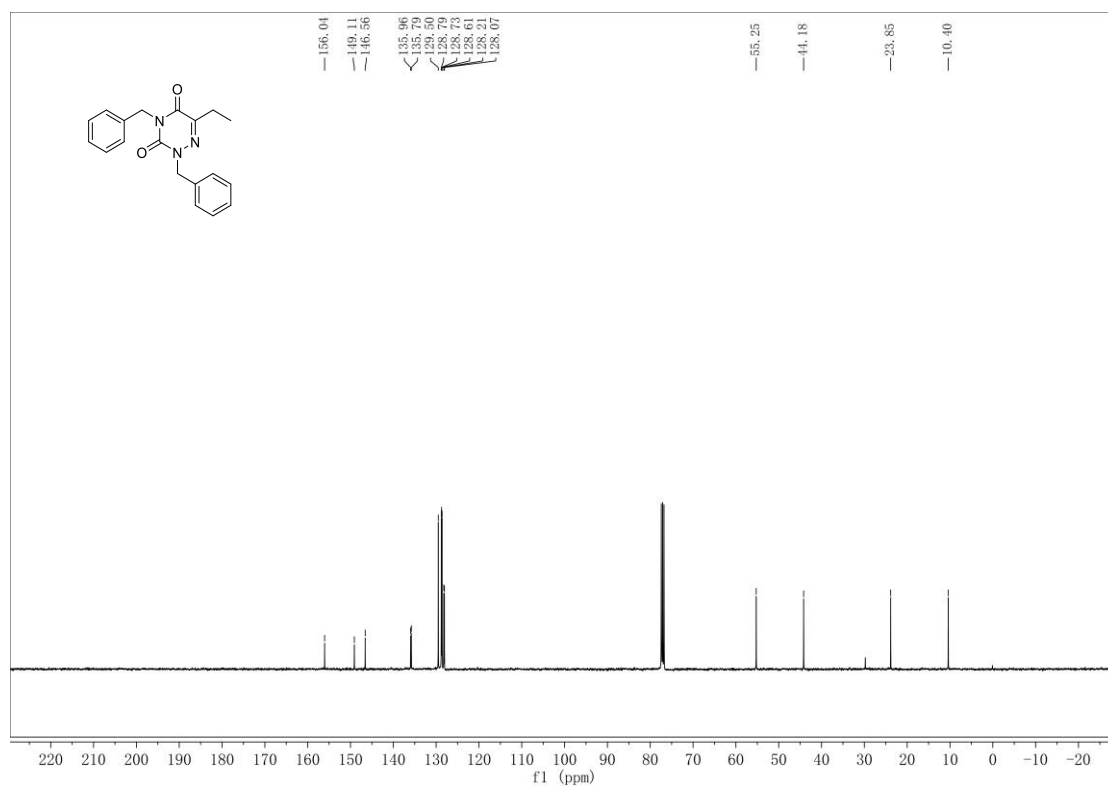

**3b-<sup>1</sup>H**

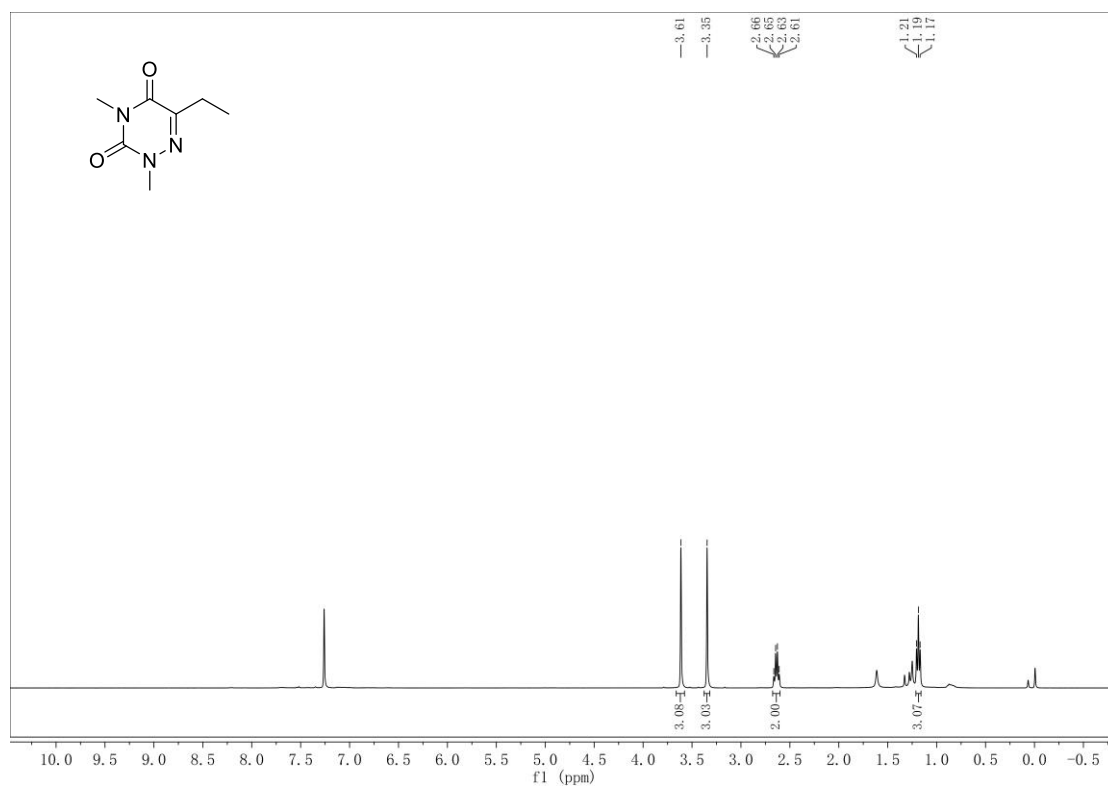

**3b-<sup>13</sup>C**

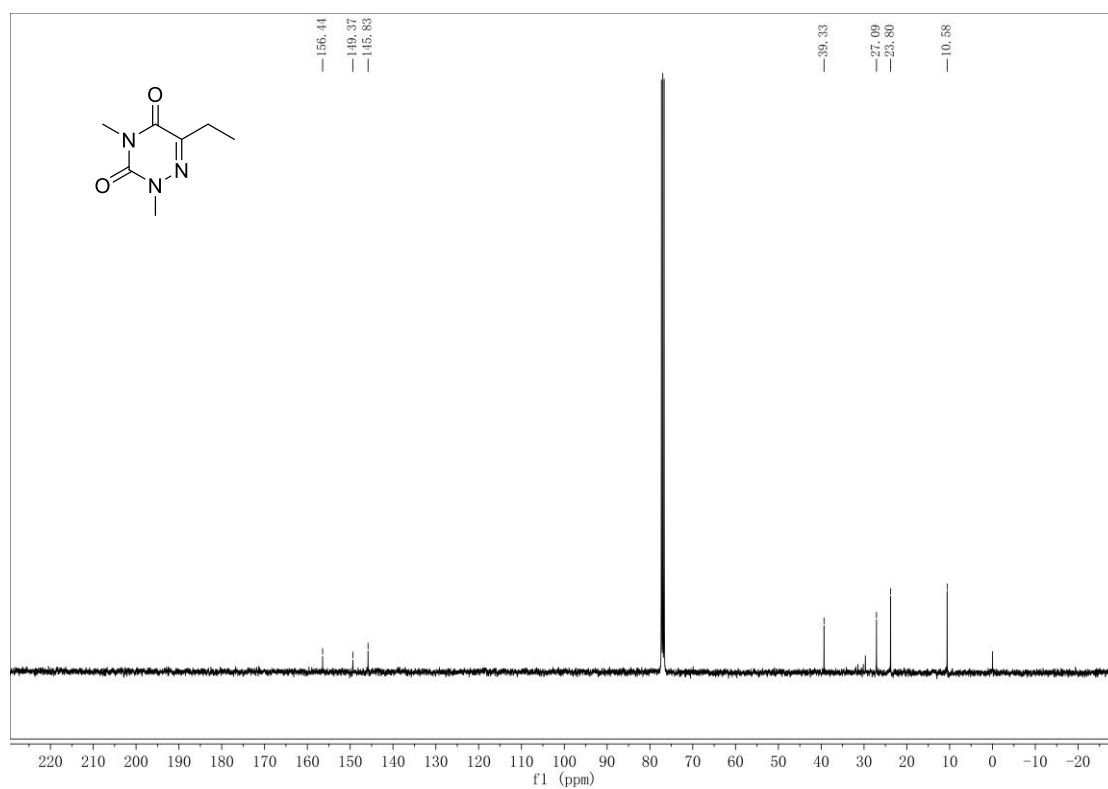

**3c-<sup>1</sup>H**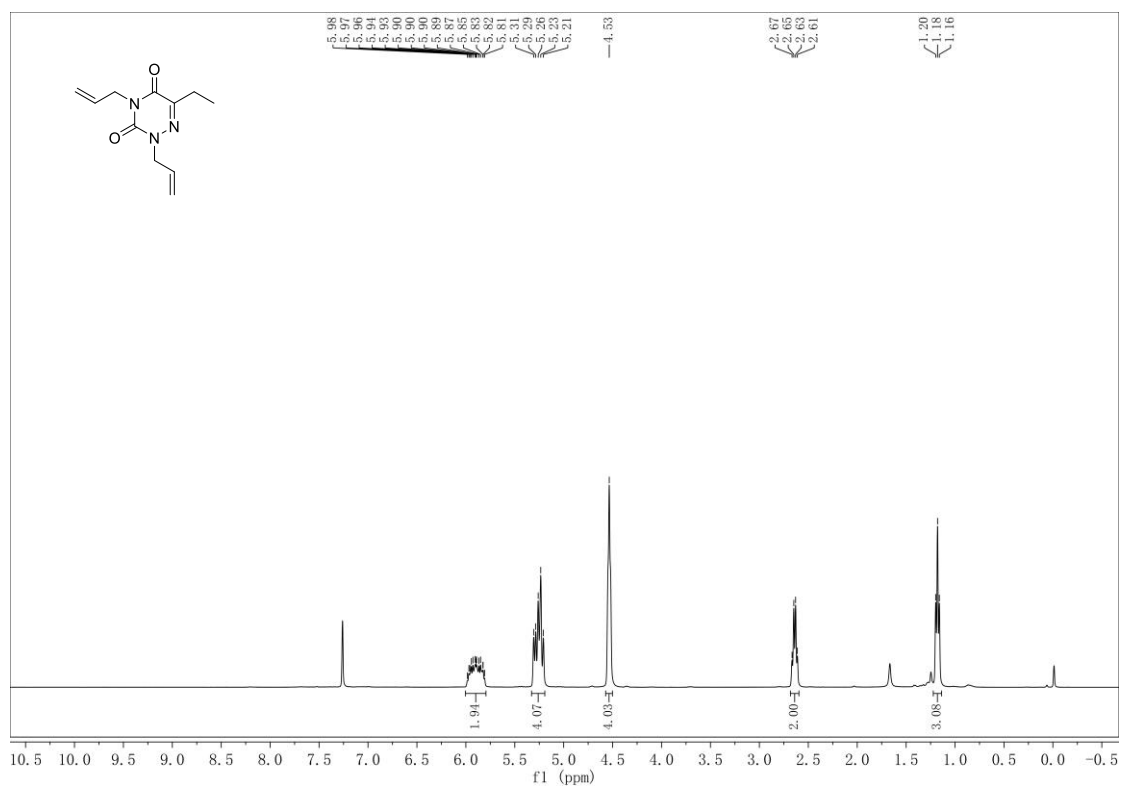**3c-<sup>13</sup>C**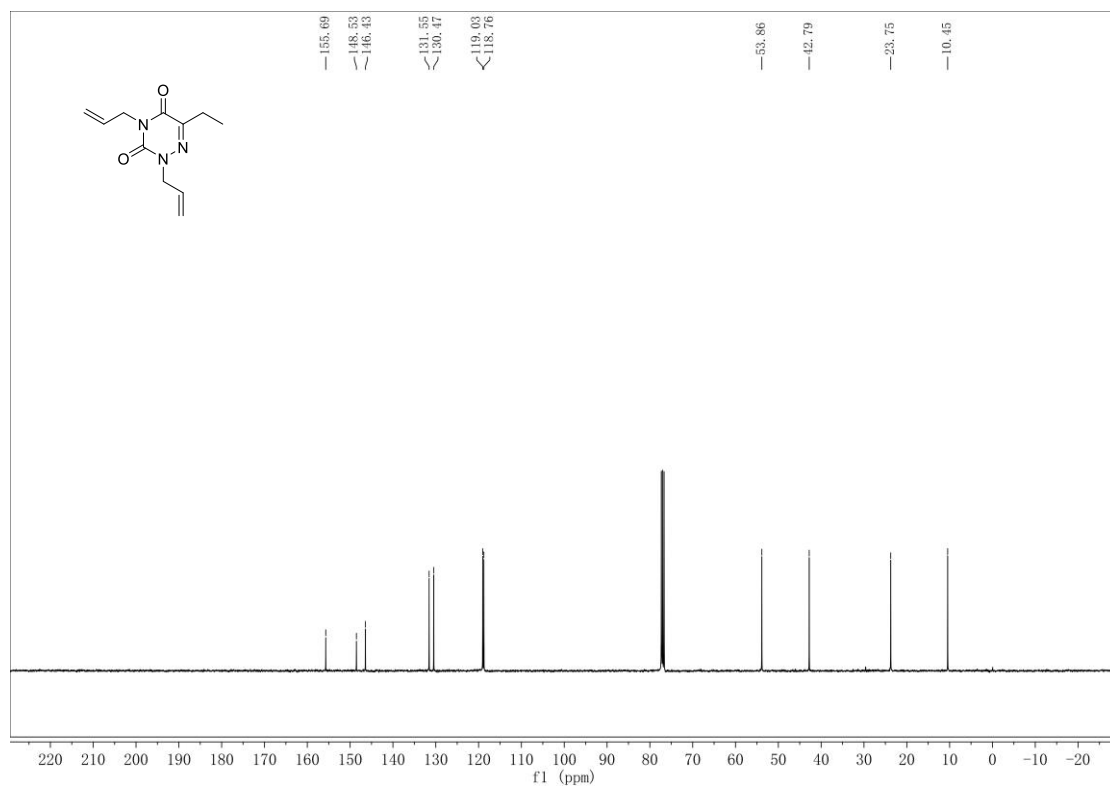

**3d-<sup>1</sup>H**

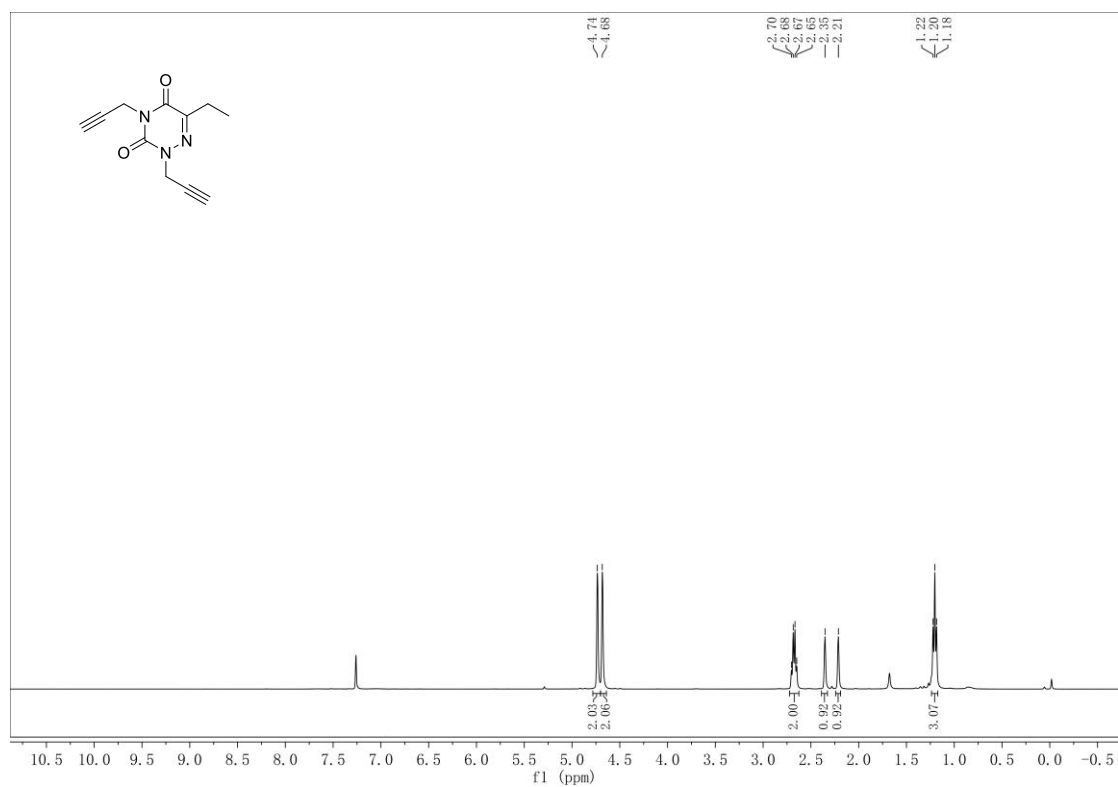

**3d-<sup>13</sup>C**

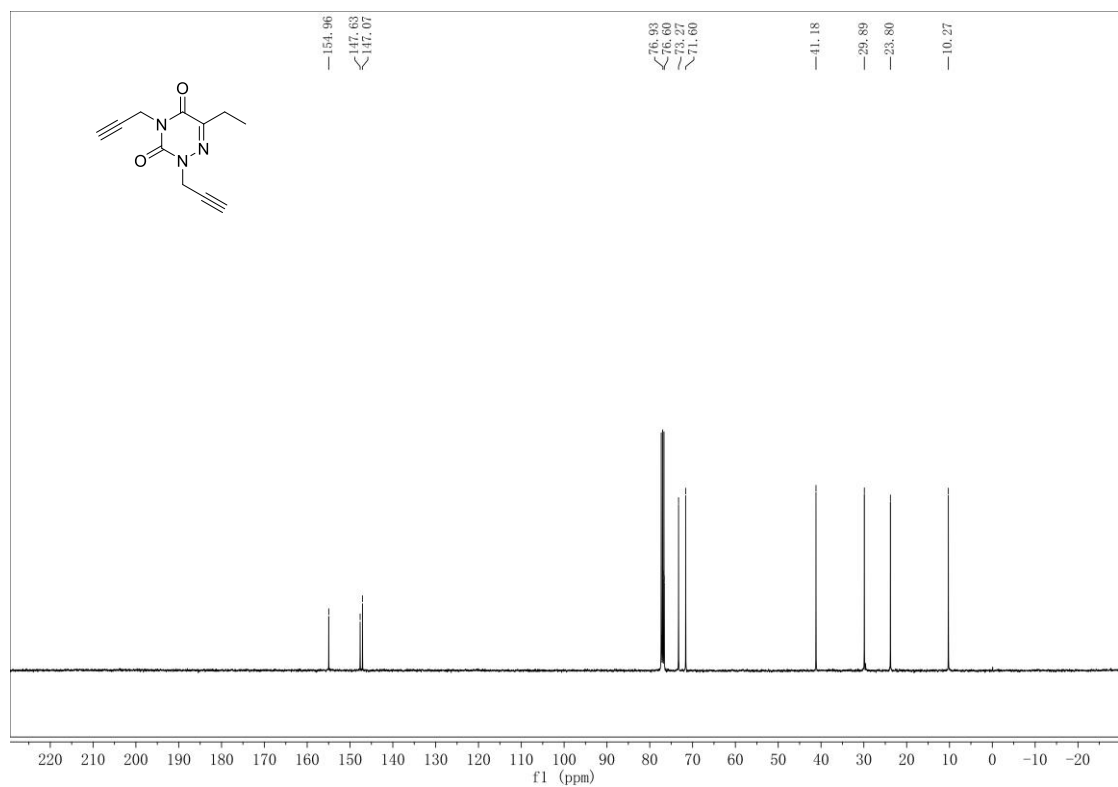



**3e-<sup>1</sup>H**

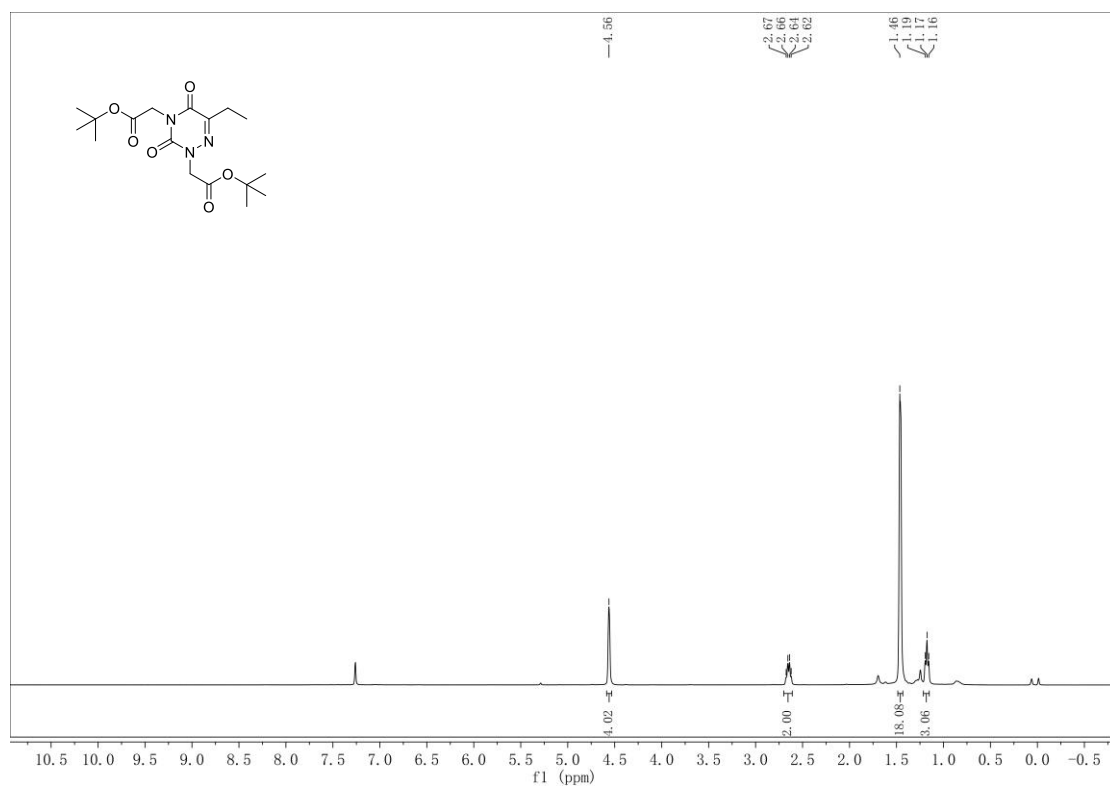

**3e-<sup>13</sup>C**

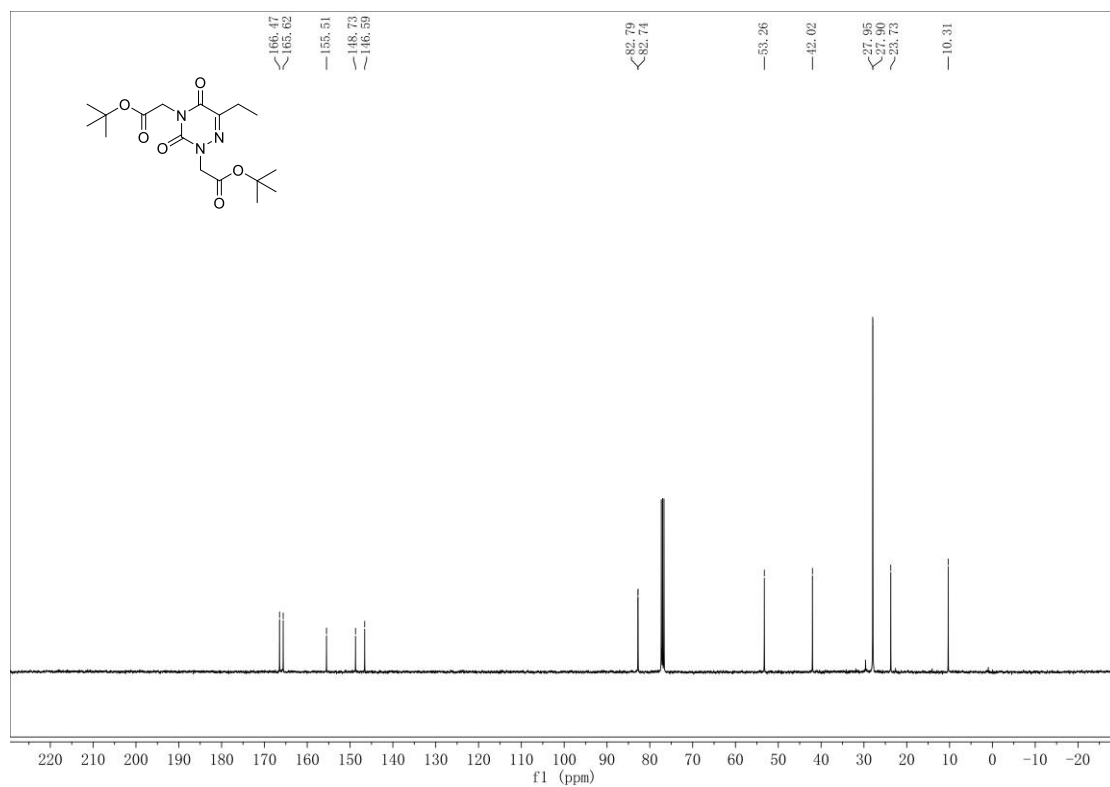

**3f-<sup>1</sup>H**

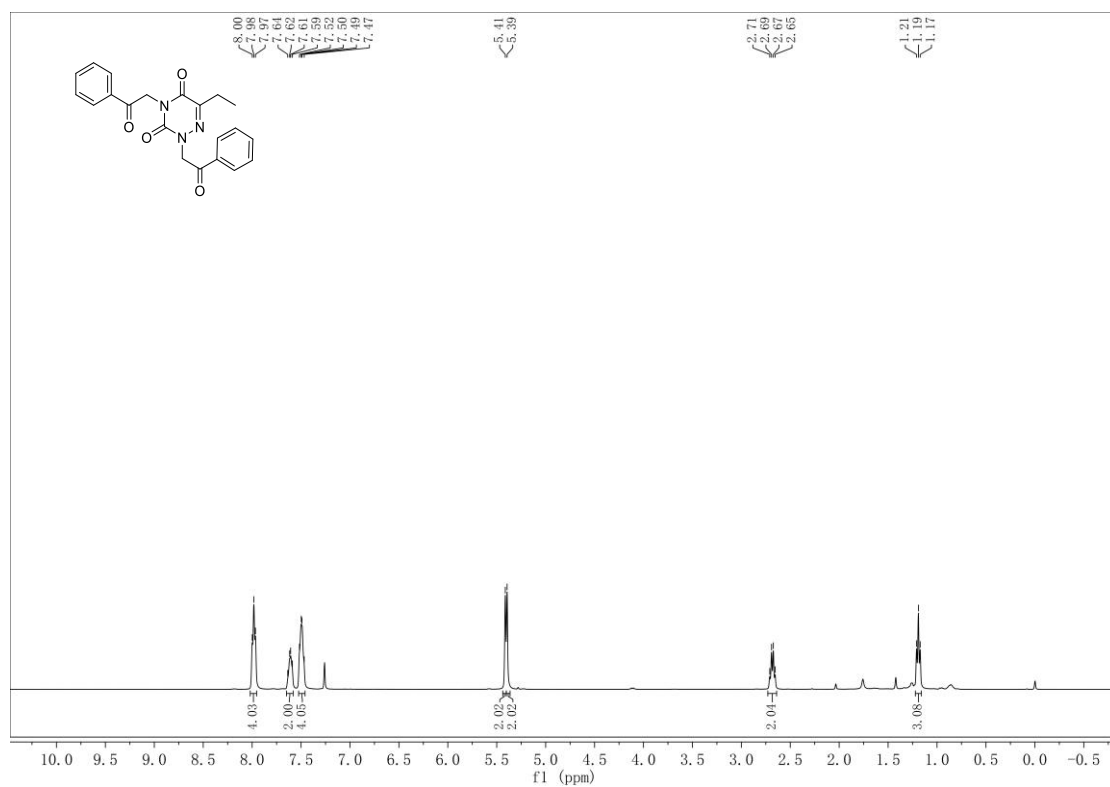

**4f-<sup>13</sup>C**

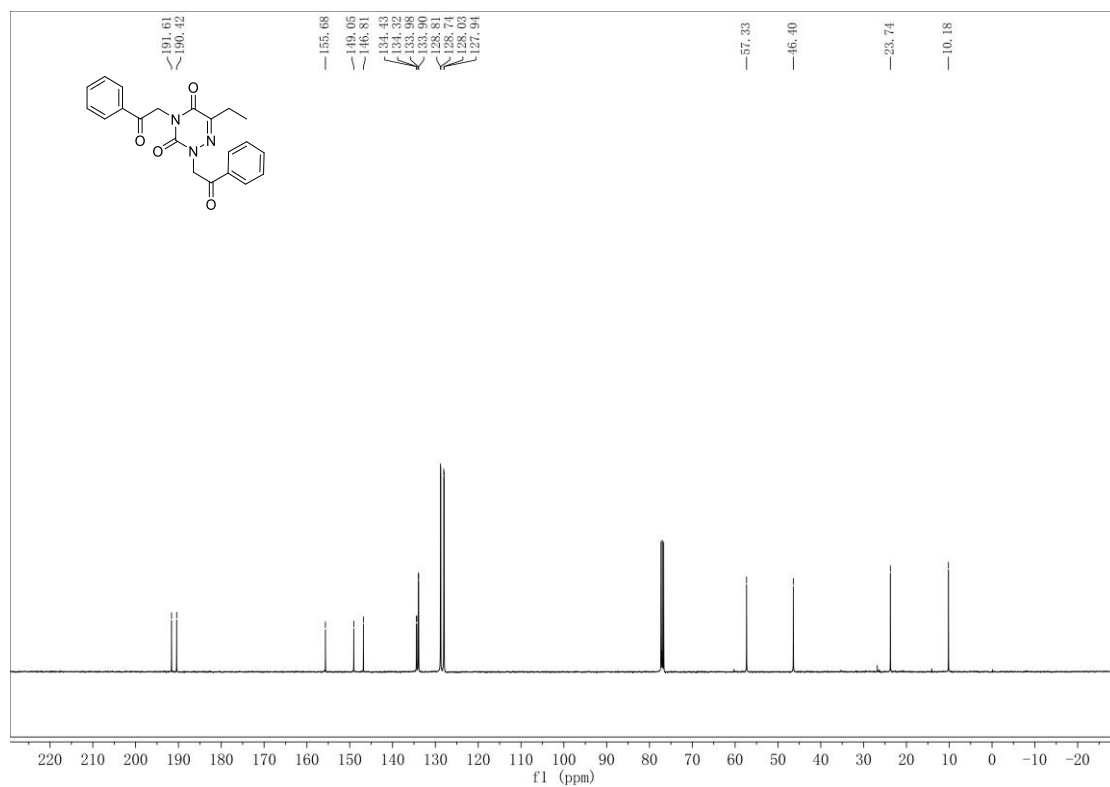

**3g-<sup>1</sup>H**

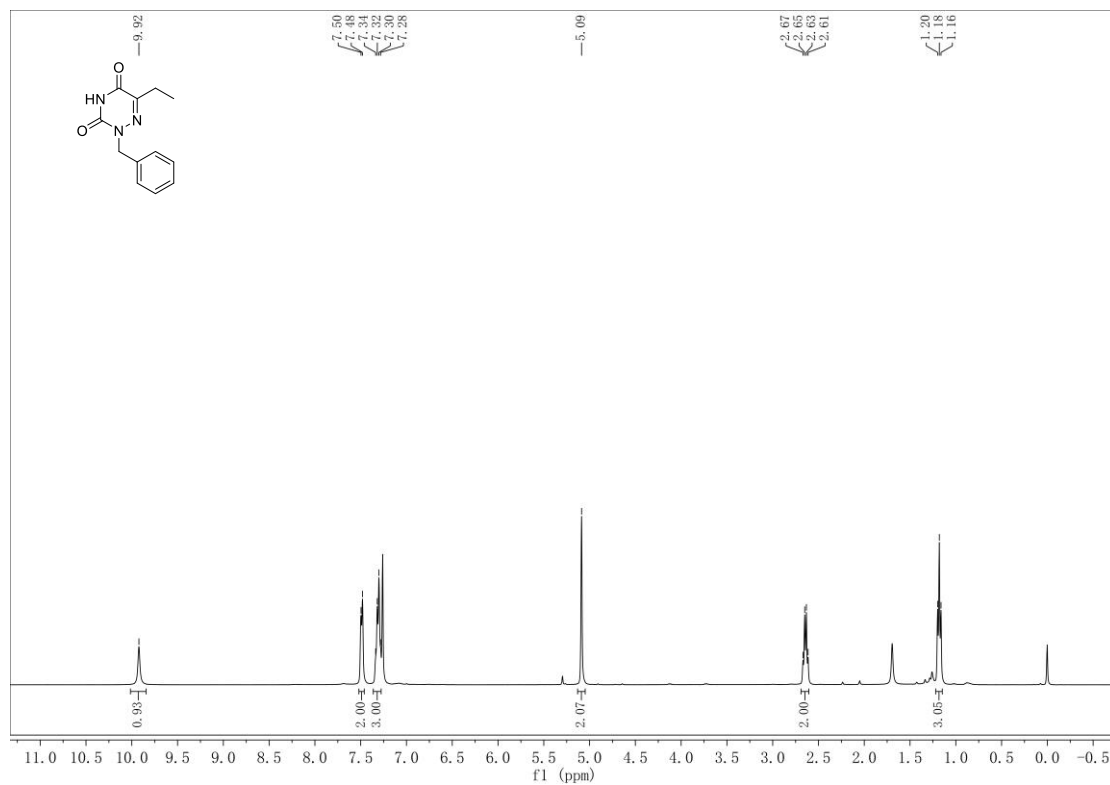

**3g-<sup>13</sup>C**

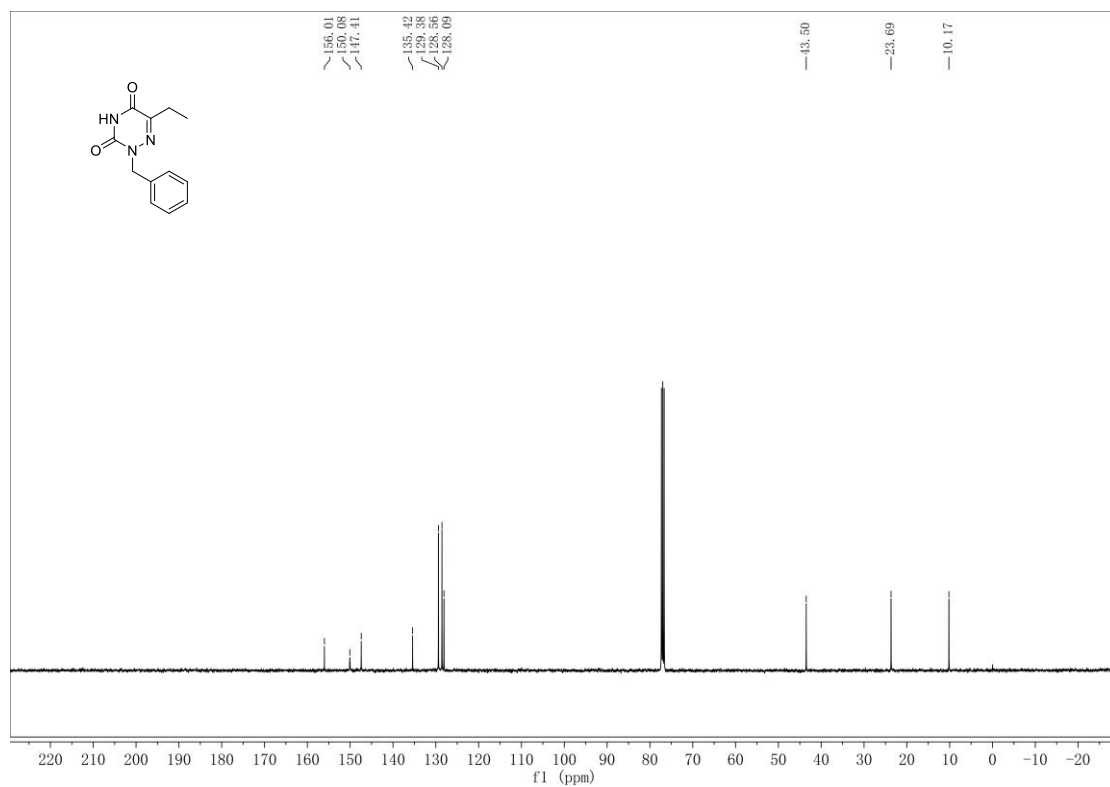

### 3h-<sup>1</sup>H

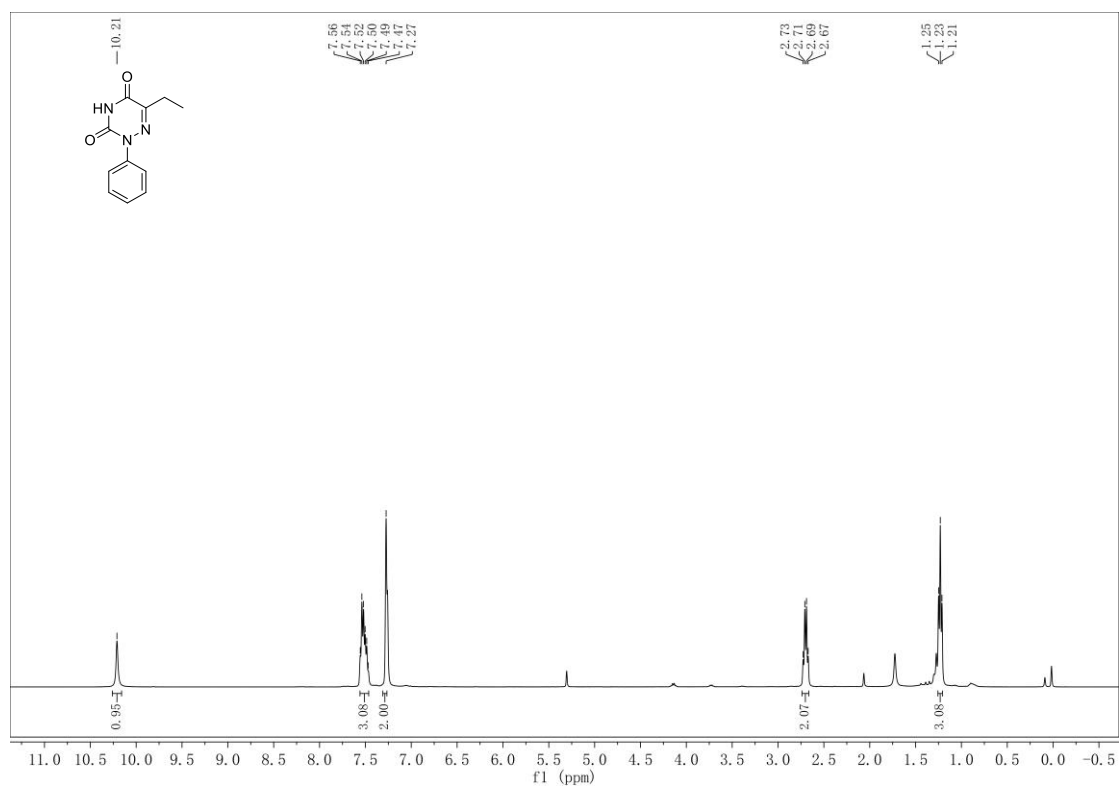

### 3h-<sup>13</sup>C

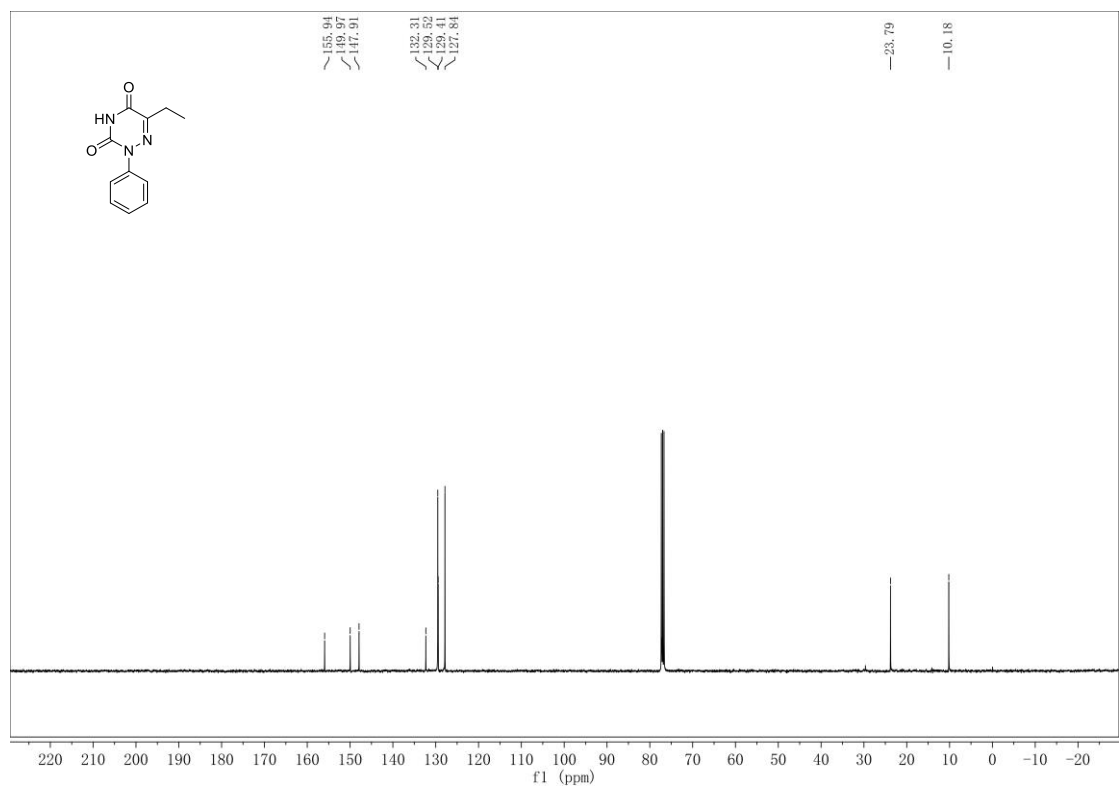

**3i-<sup>1</sup>H**

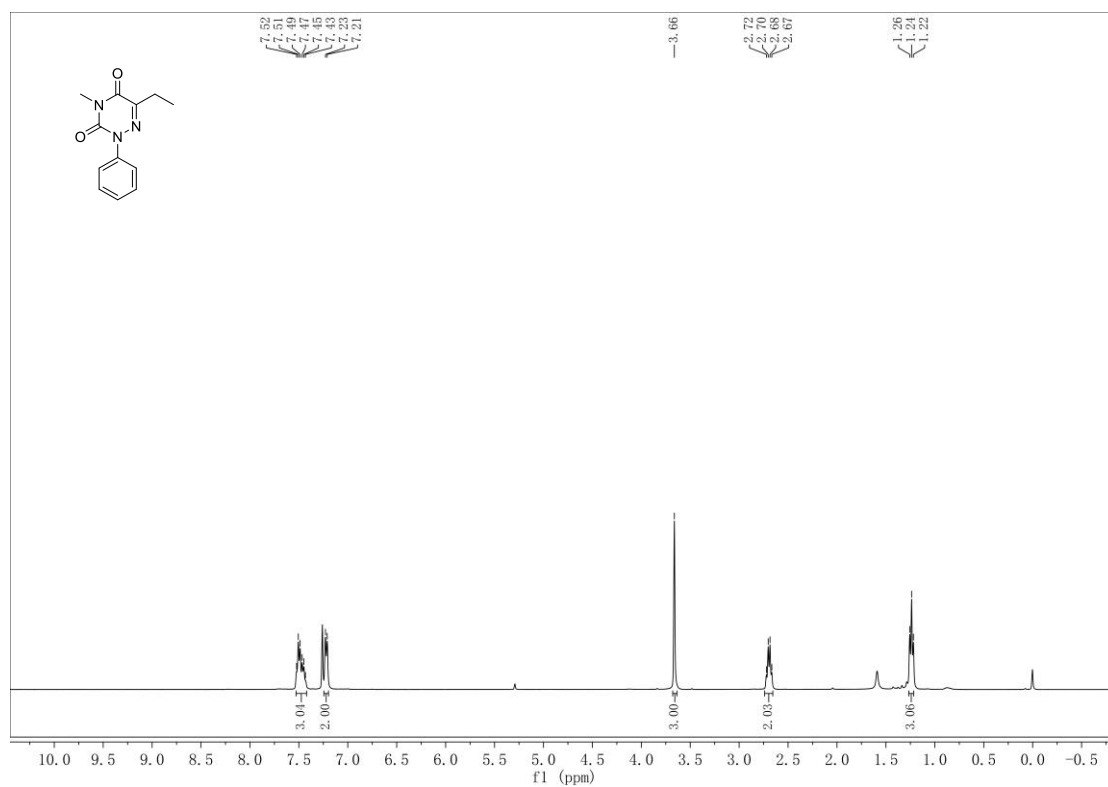

**3i-<sup>13</sup>C**

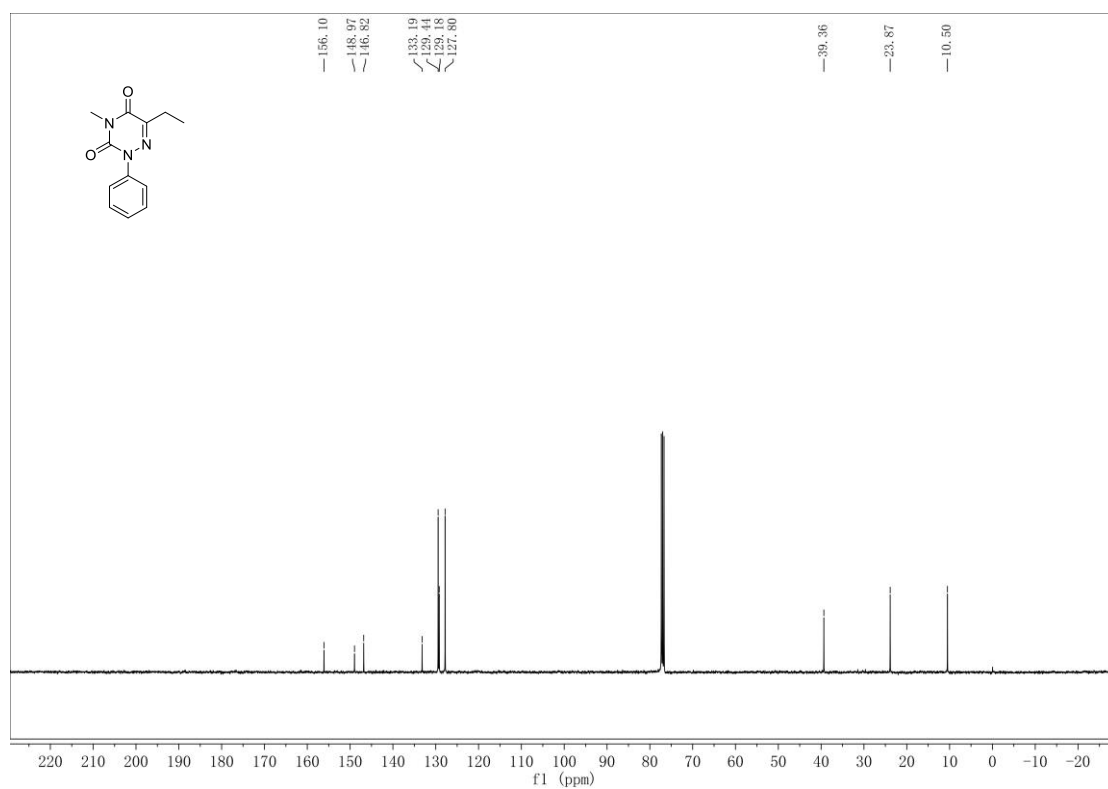

### 3j-<sup>1</sup>H

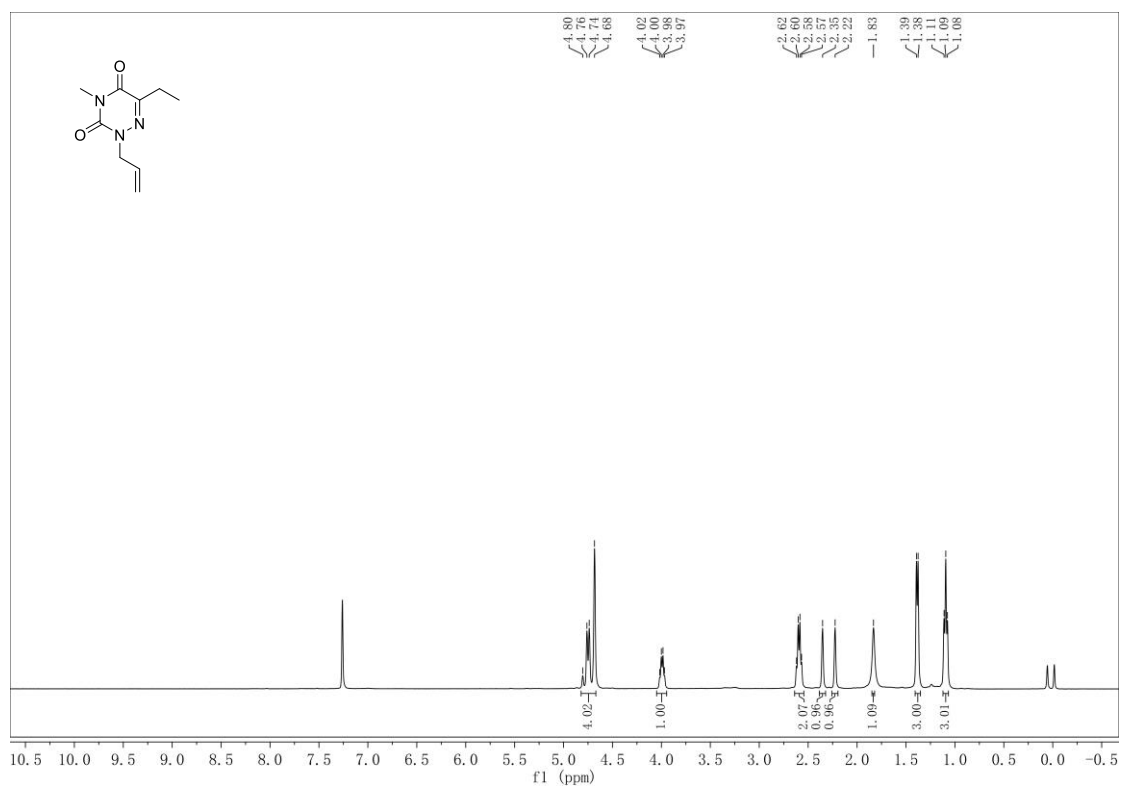

### 3j-<sup>13</sup>C

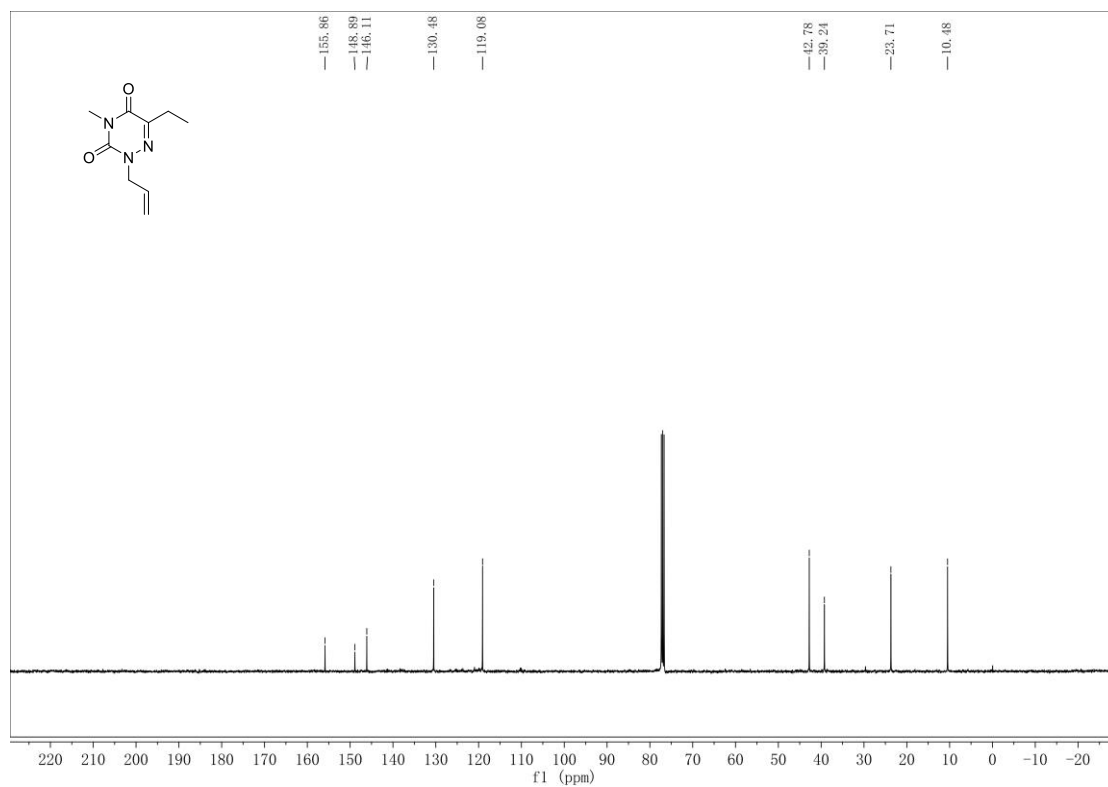

**3k-<sup>1</sup>H**

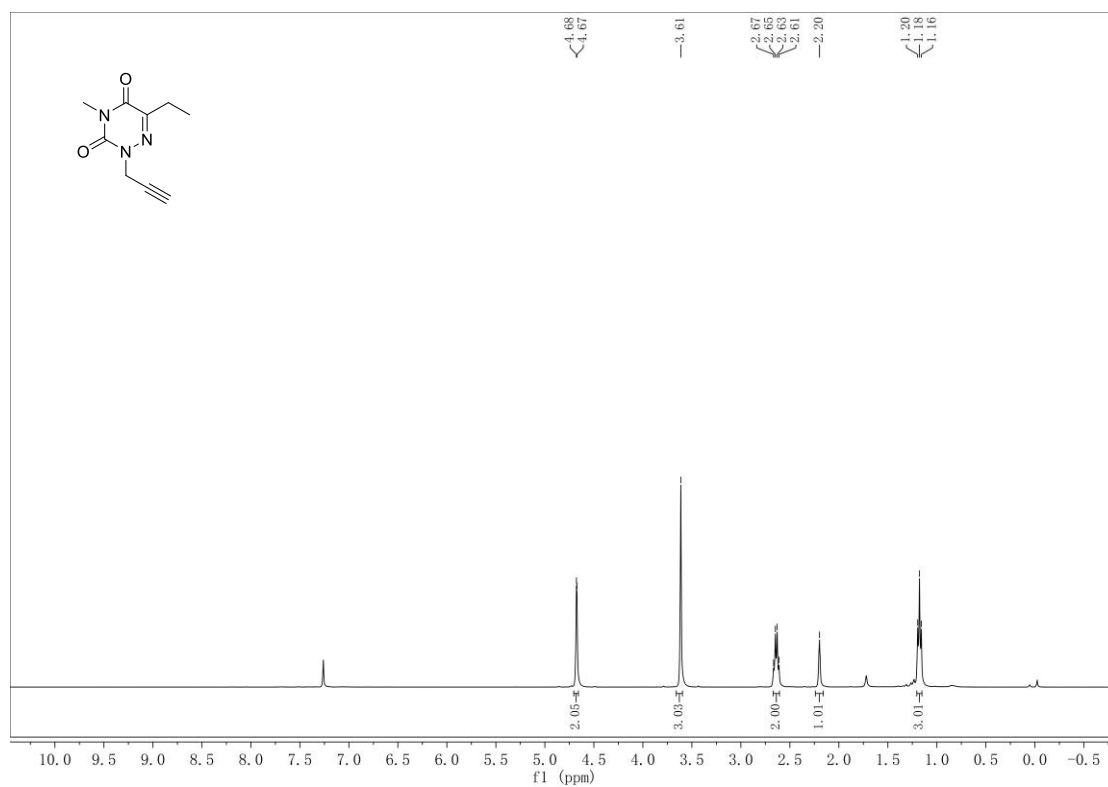

**3k-<sup>13</sup>C**

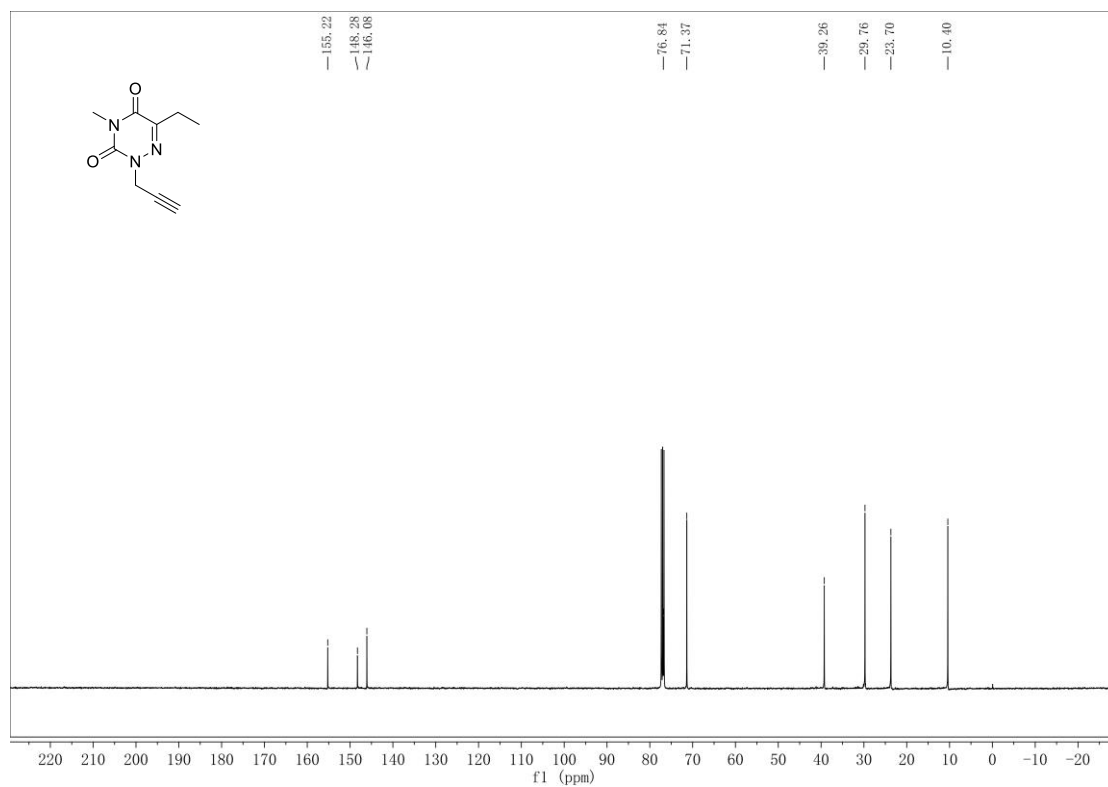

**31-<sup>1</sup>H**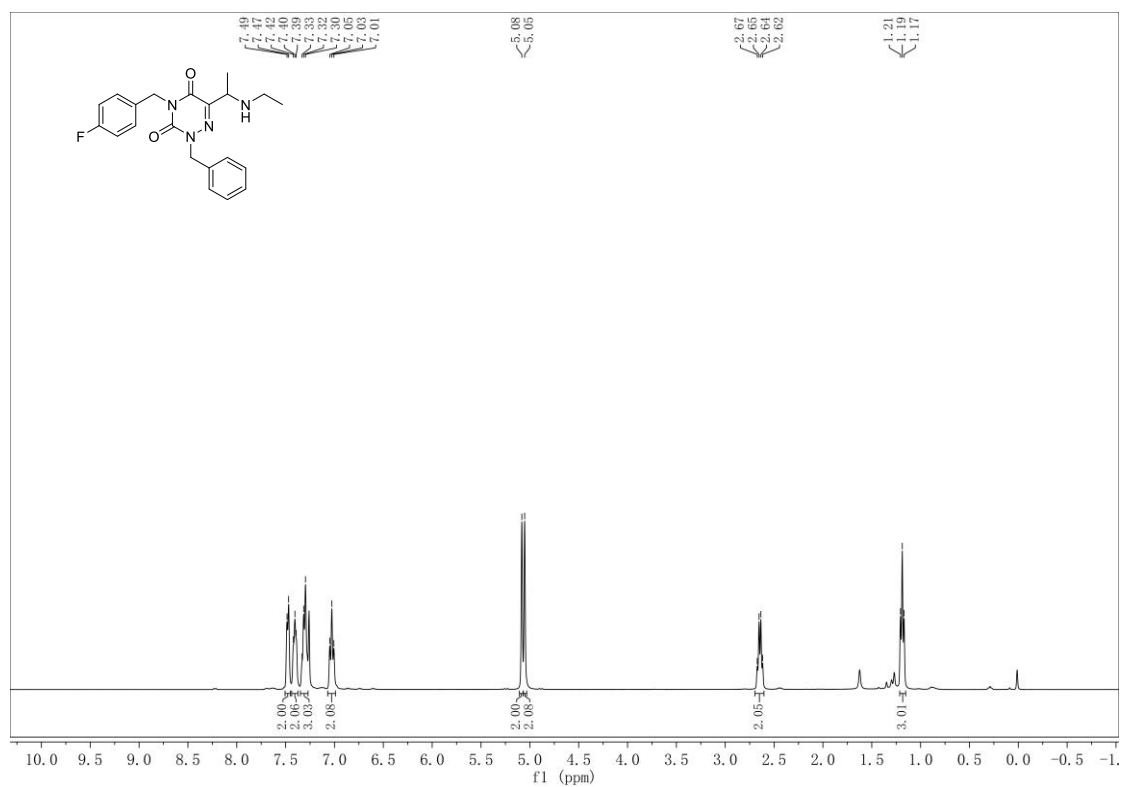**31-<sup>13</sup>C**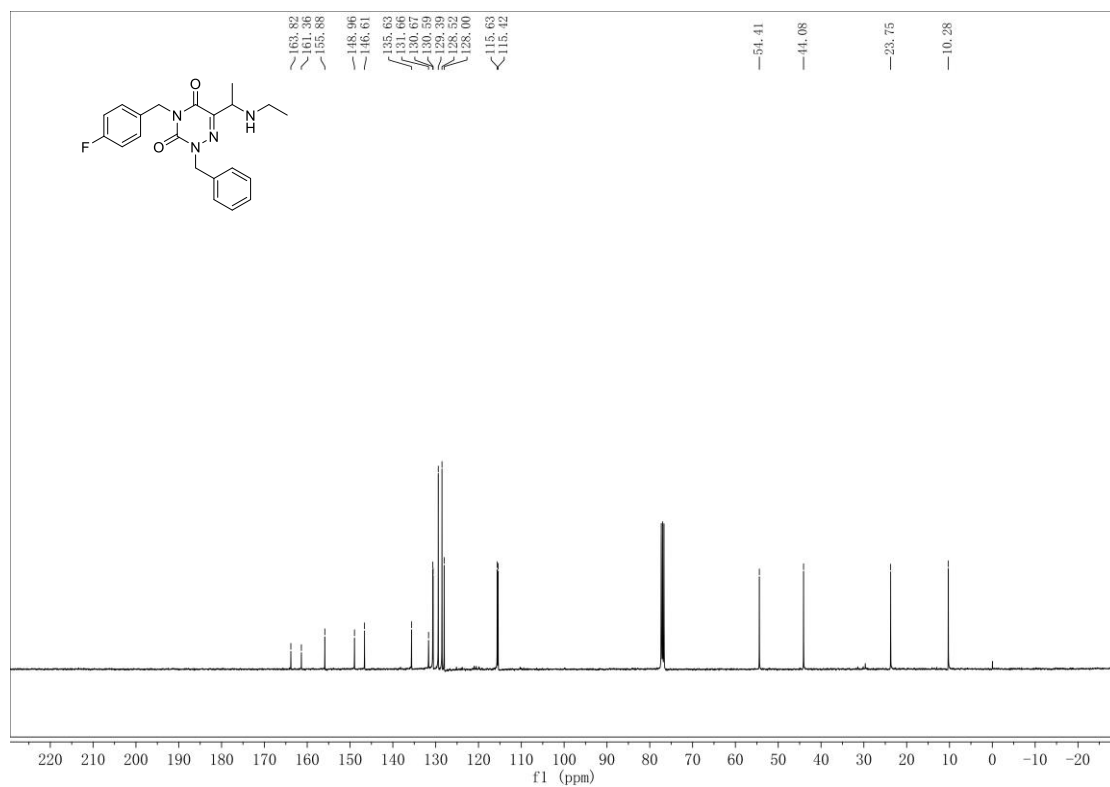



**3m-<sup>1</sup>H**

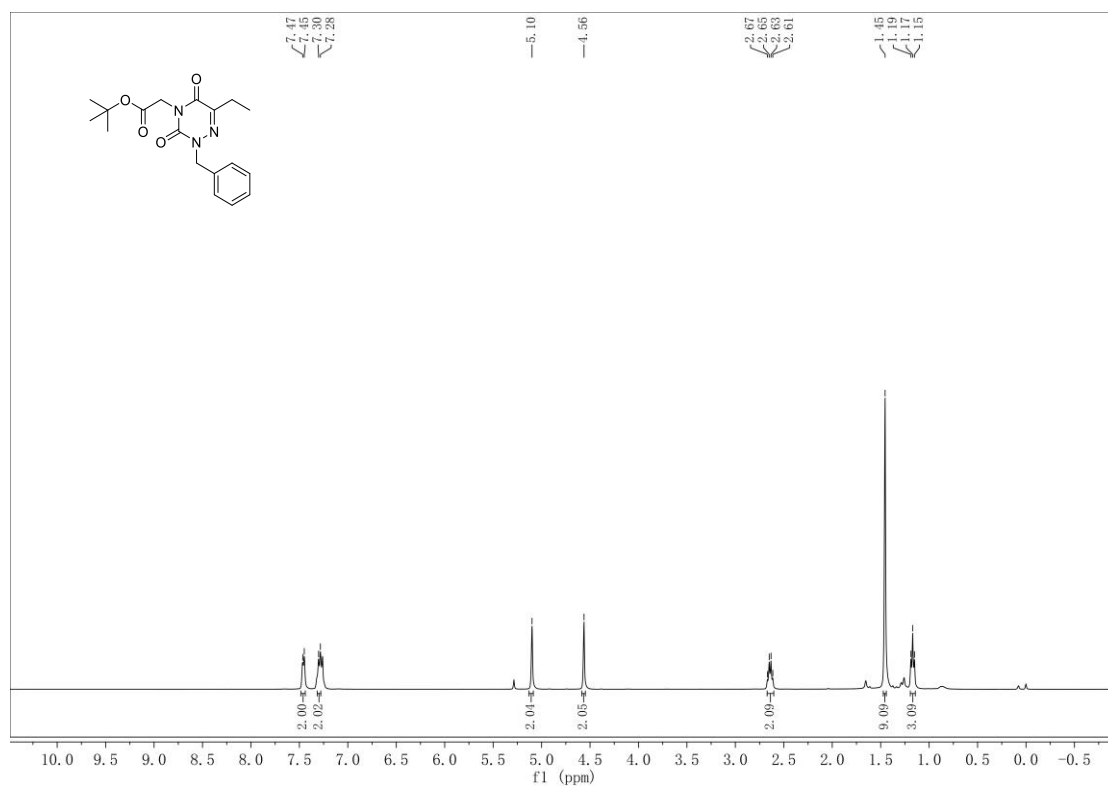

**3m-<sup>13</sup>C**

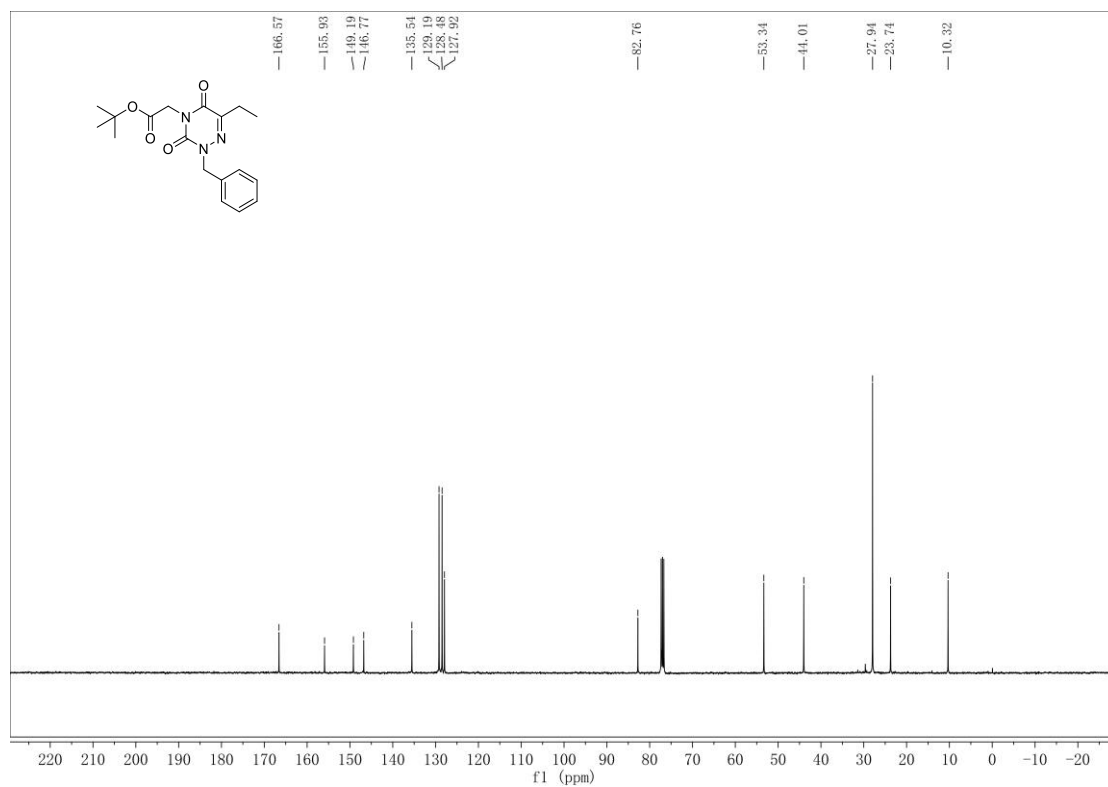

**3n-<sup>1</sup>H**

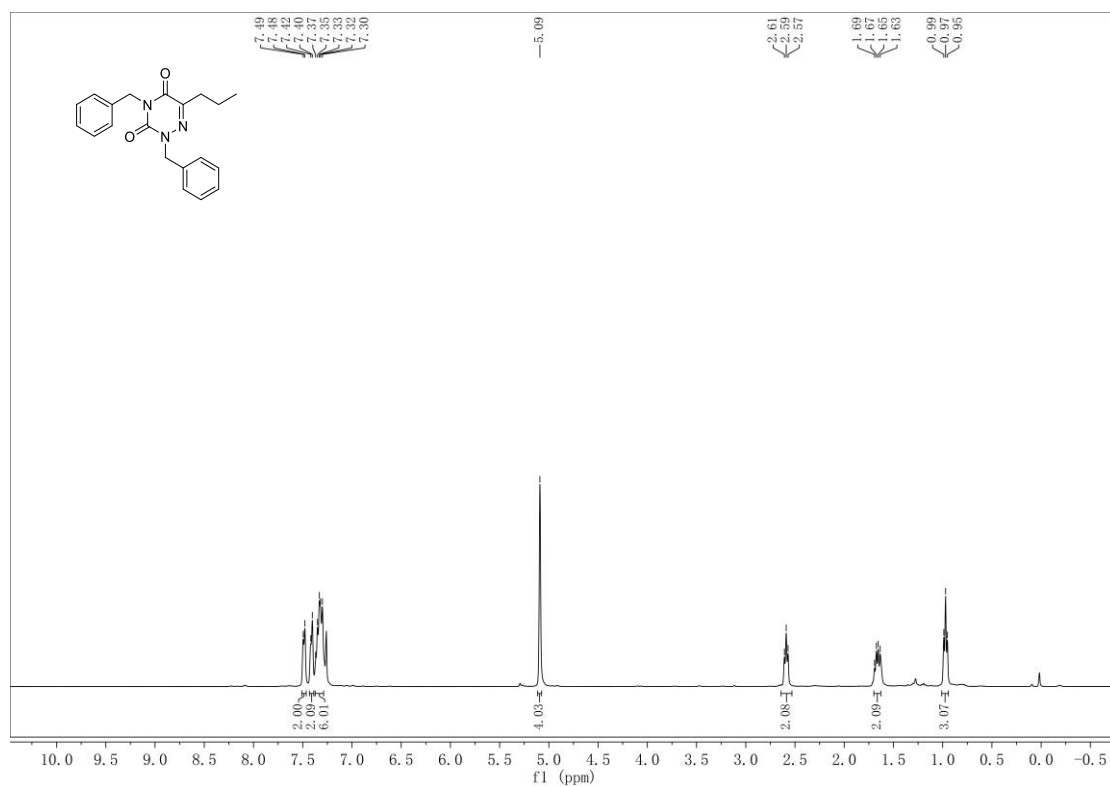

**3n-<sup>13</sup>C**

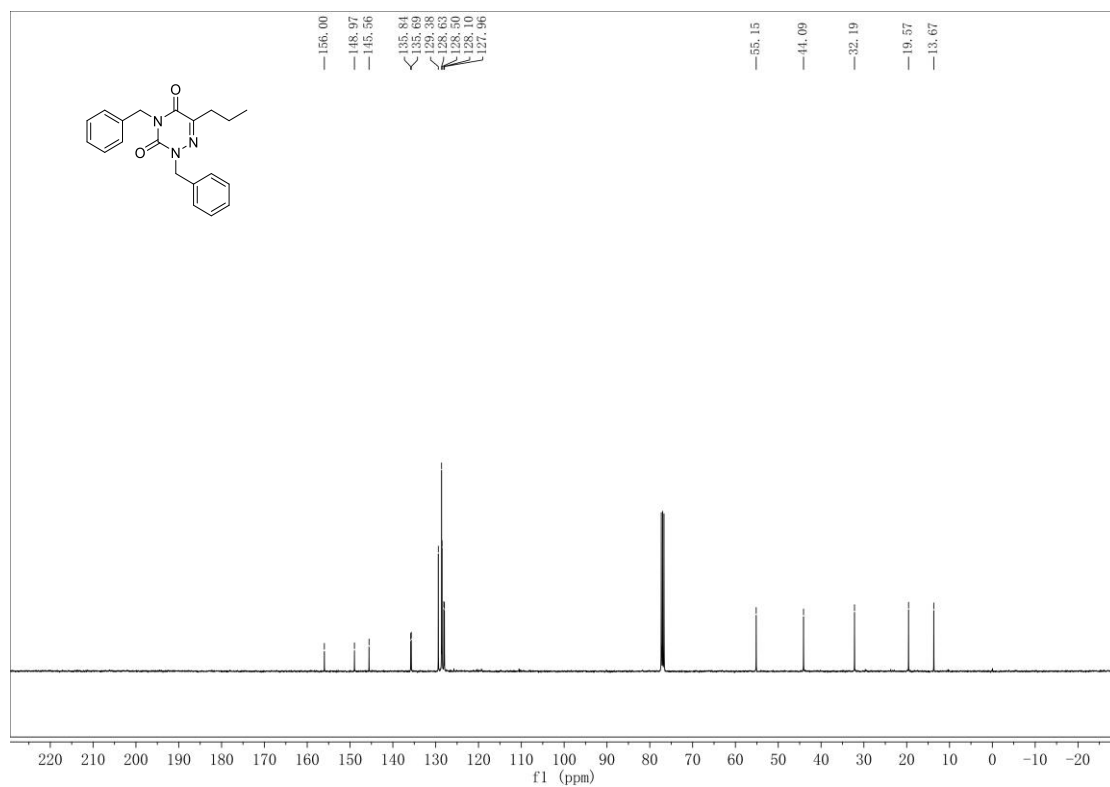

**30-<sup>1</sup>H**

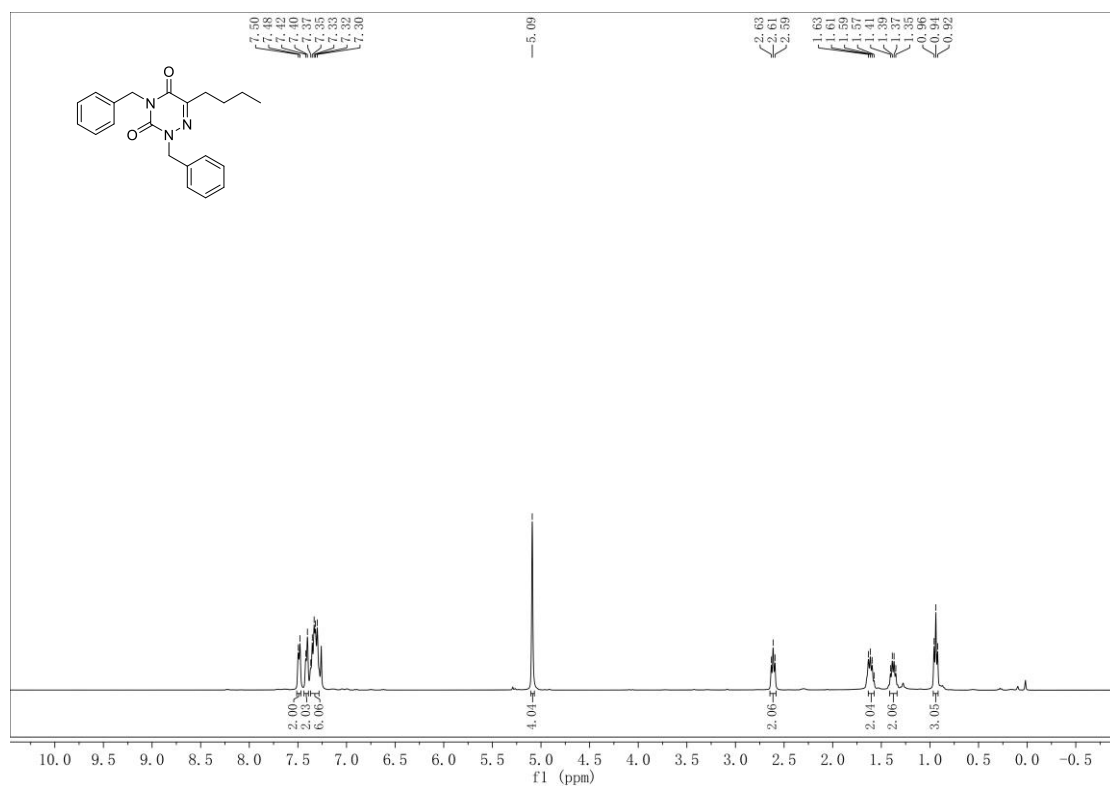

**30-<sup>13</sup>C**

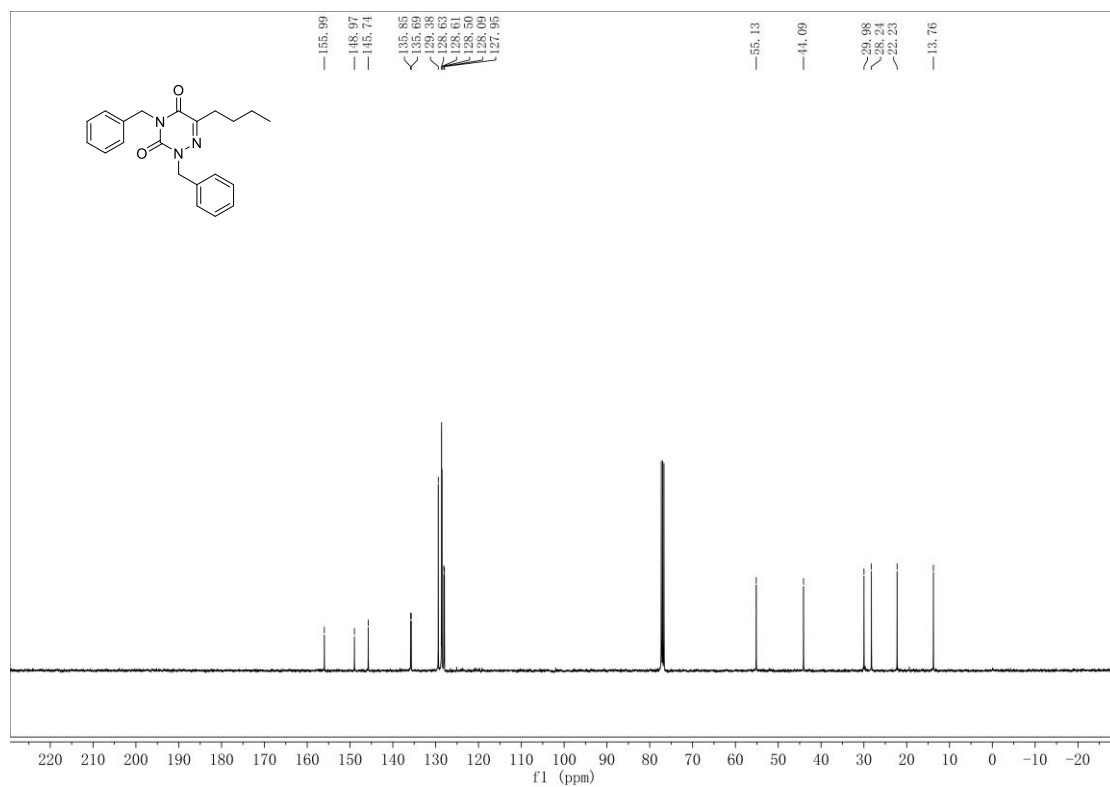

### 3p-<sup>1</sup>H

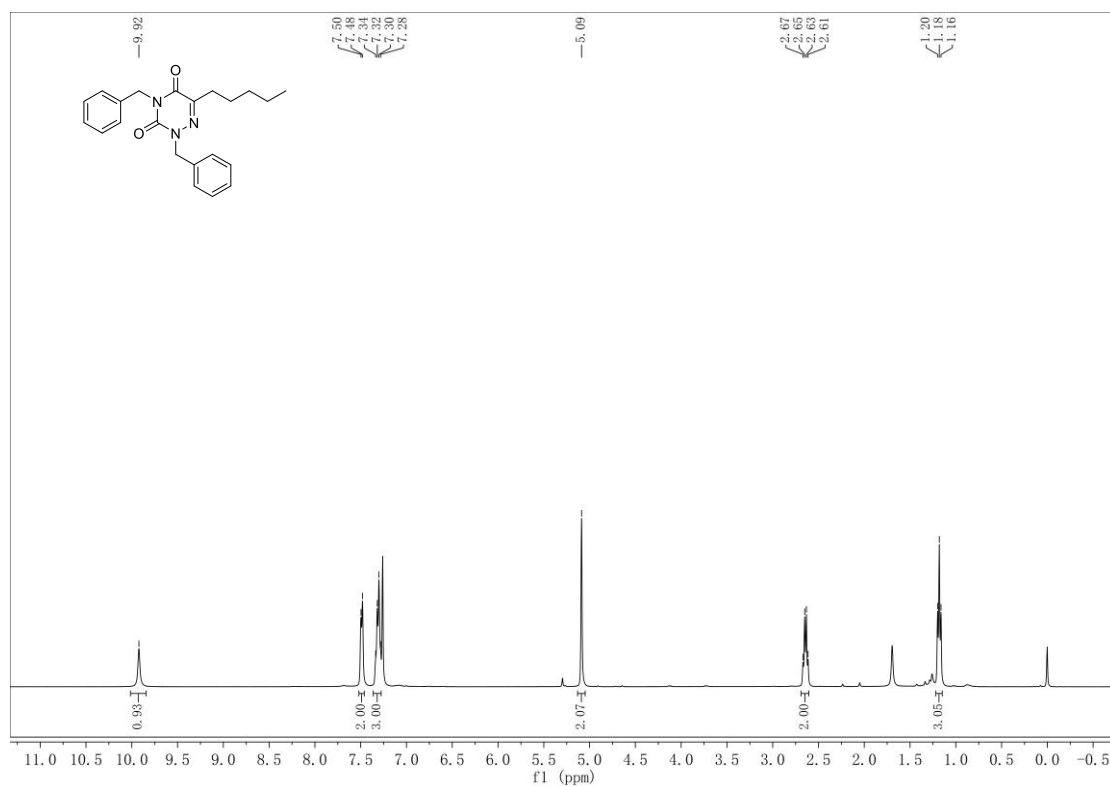

### 3p-<sup>13</sup>C

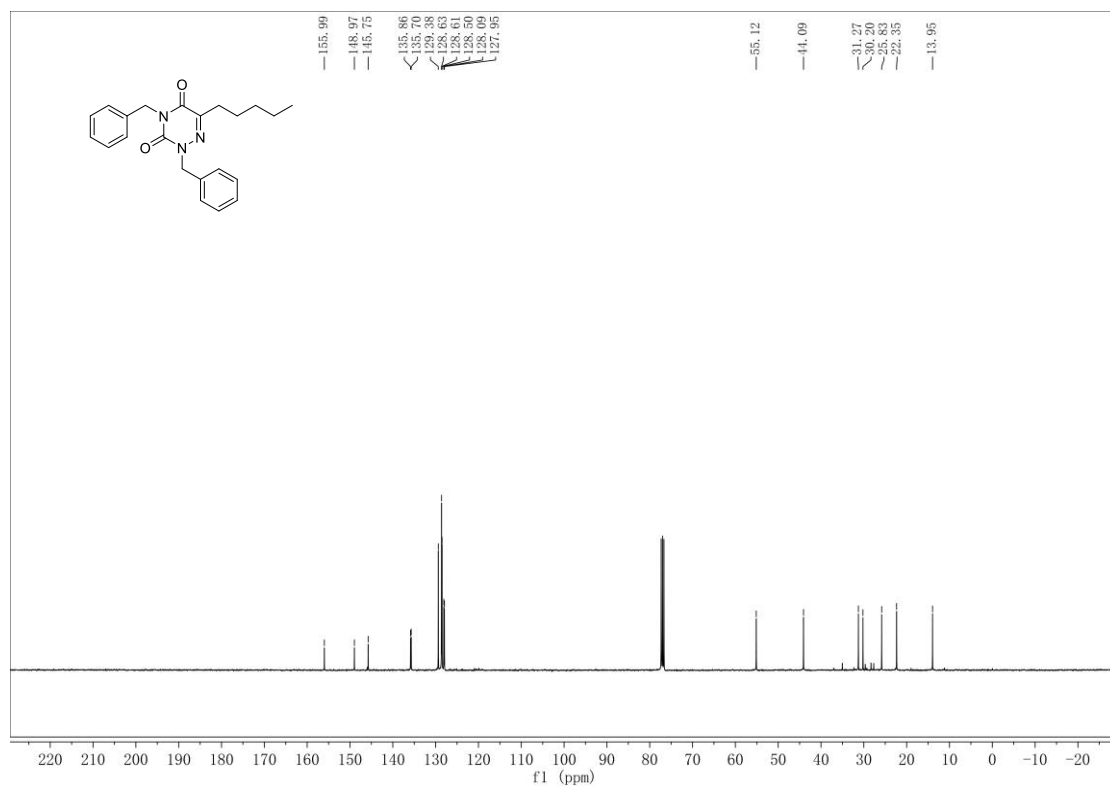

### 3q-<sup>1</sup>H

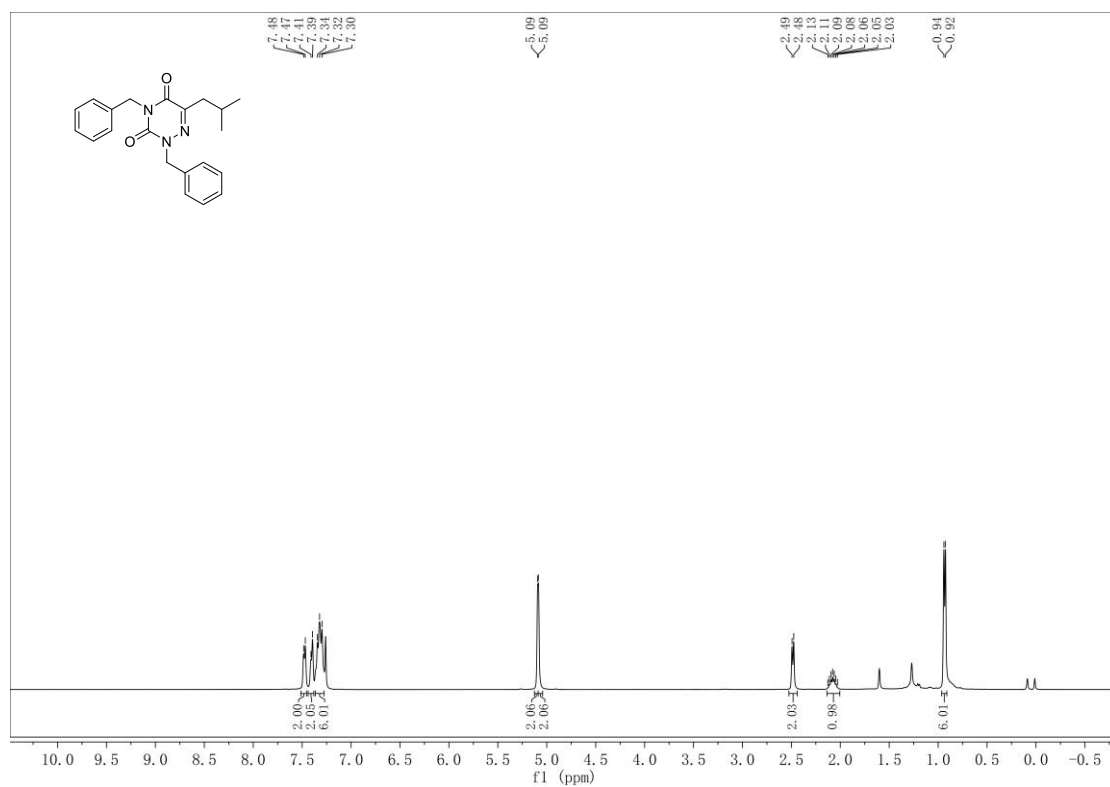

### 3q-<sup>13</sup>C

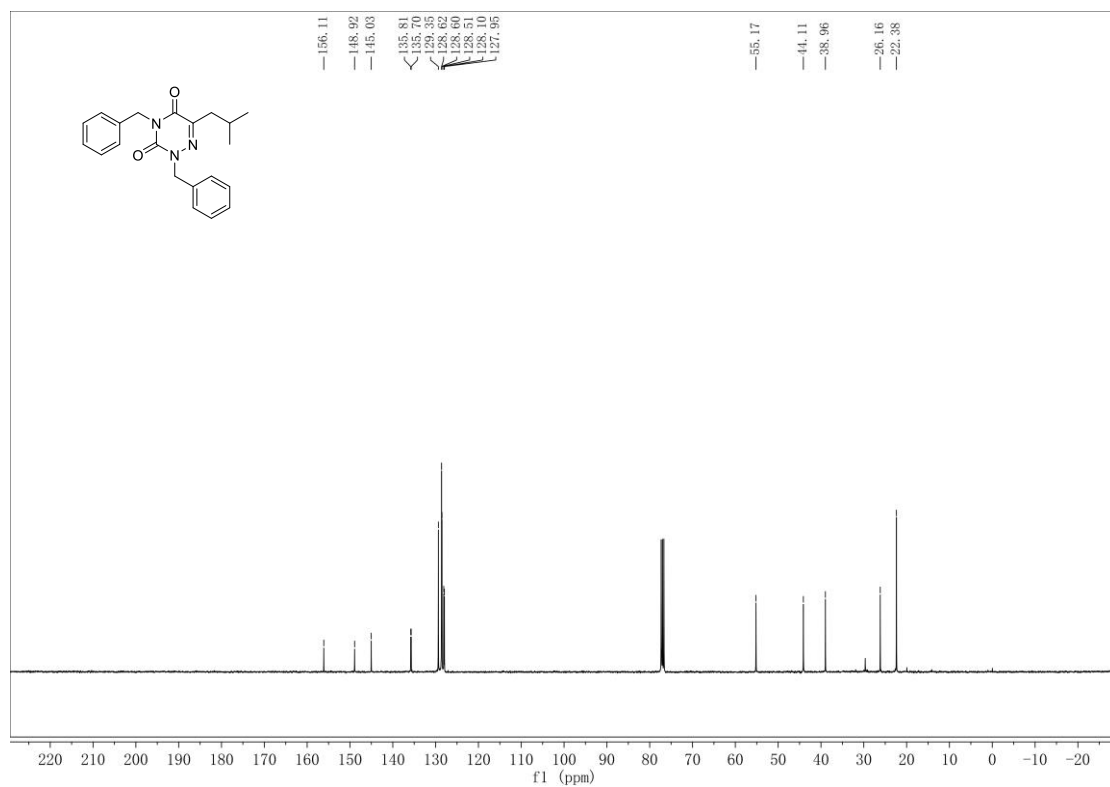

**3r-<sup>1</sup>H**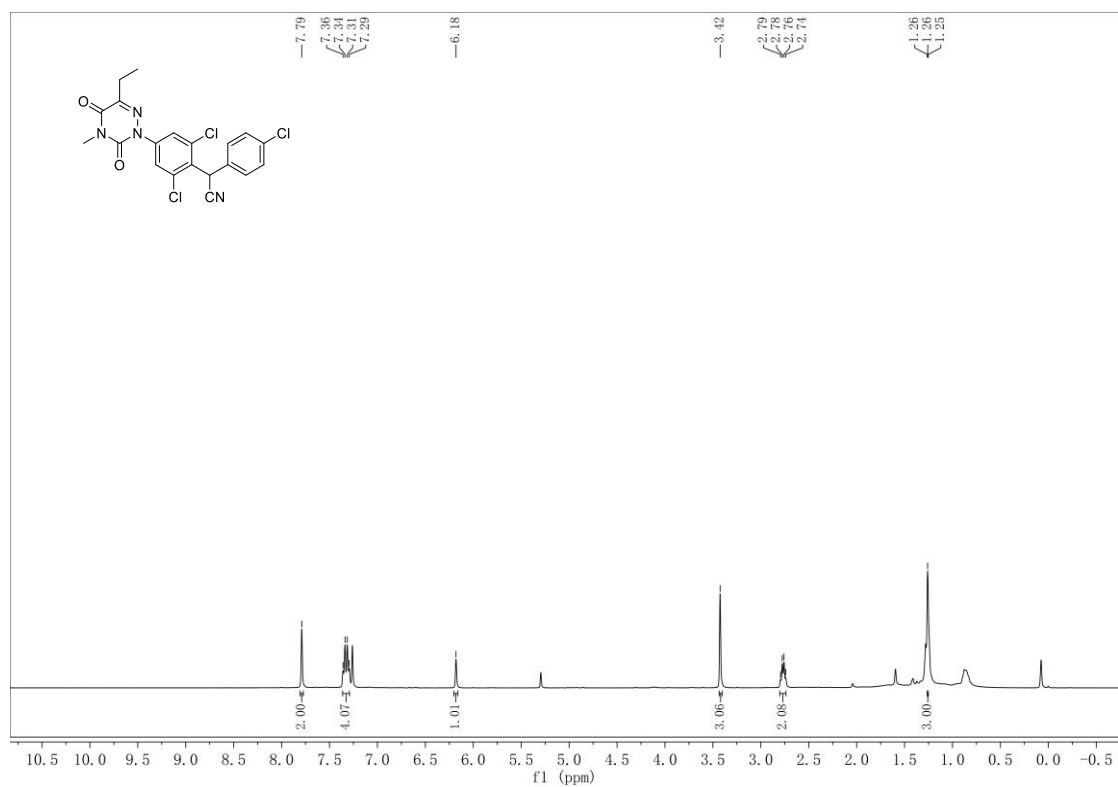**3r-<sup>13</sup>C**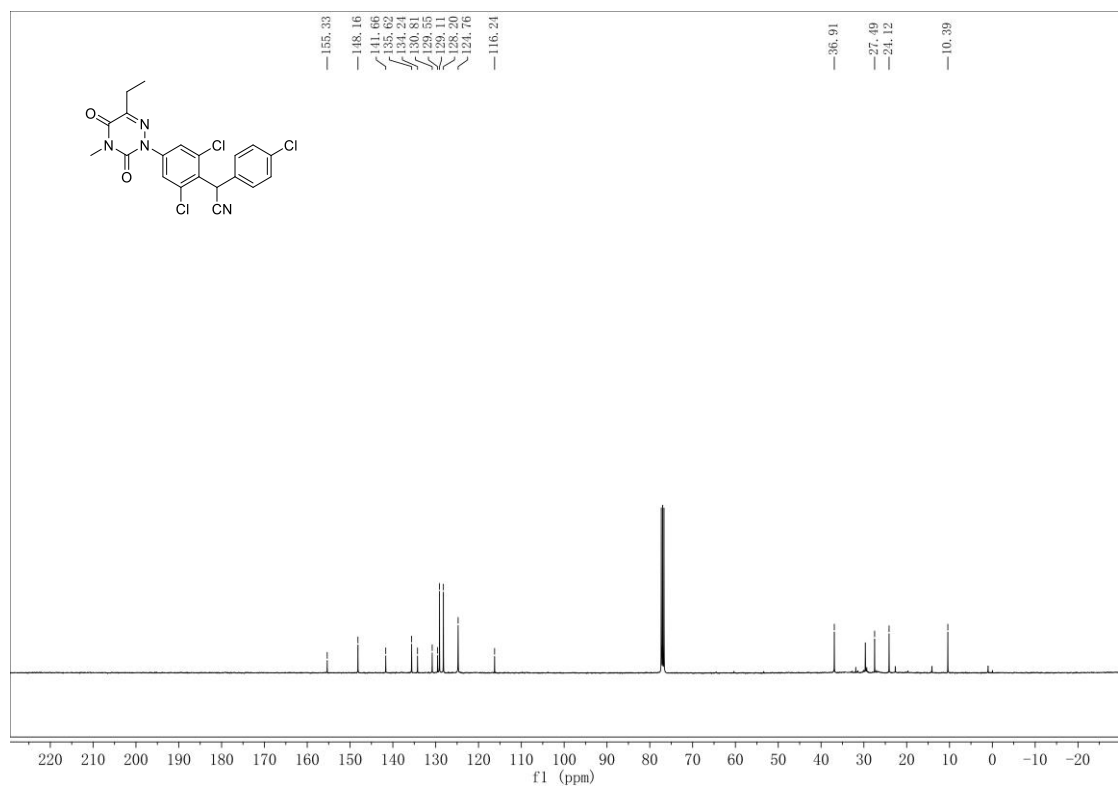

**3s-<sup>1</sup>H**

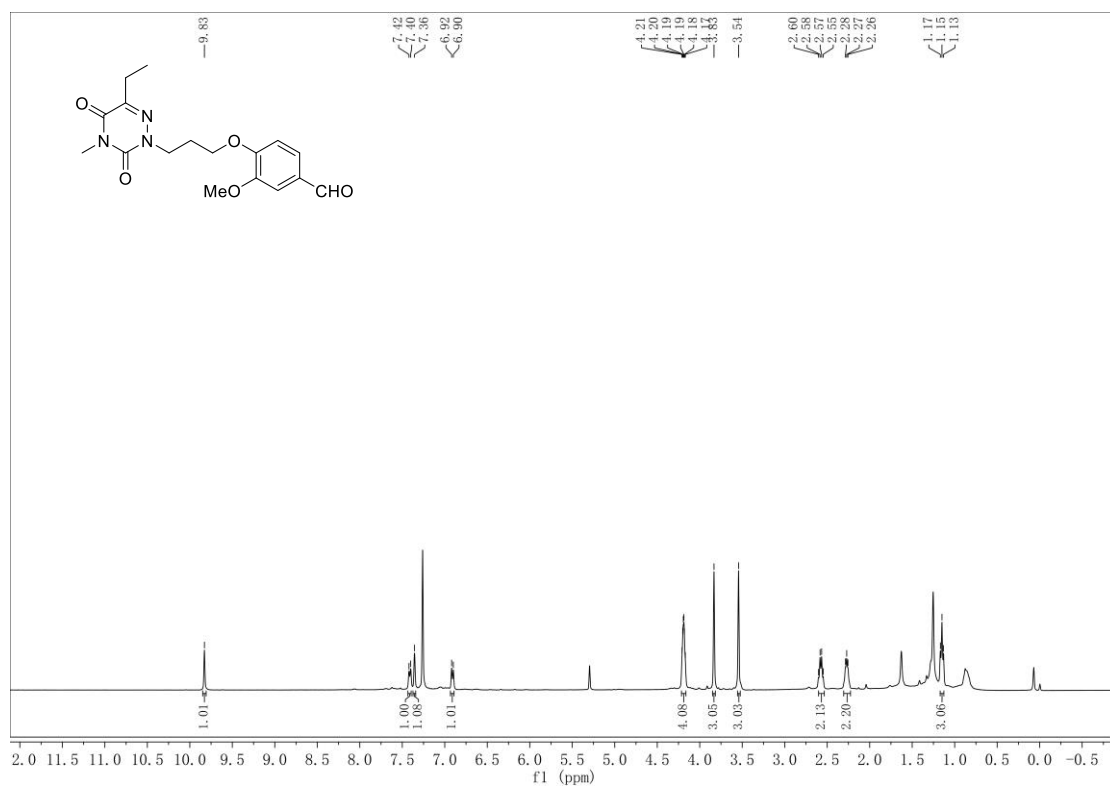

**3s-<sup>13</sup>C**

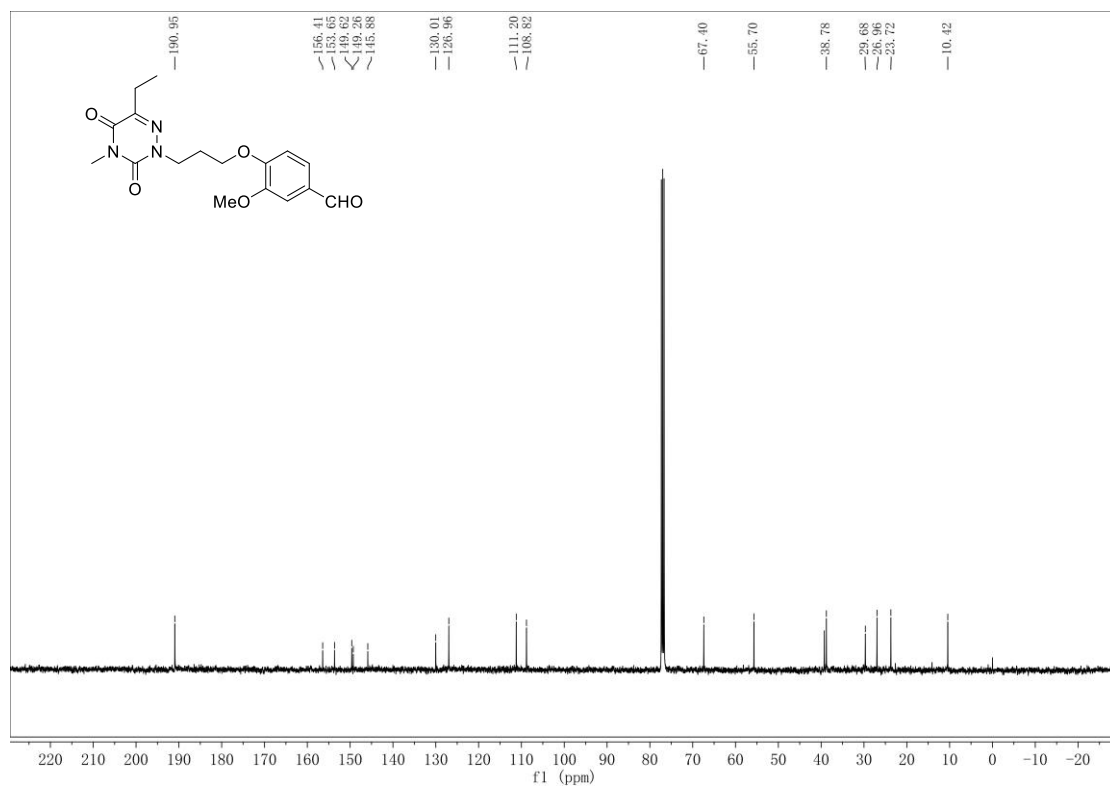

**3t-<sup>1</sup>H**

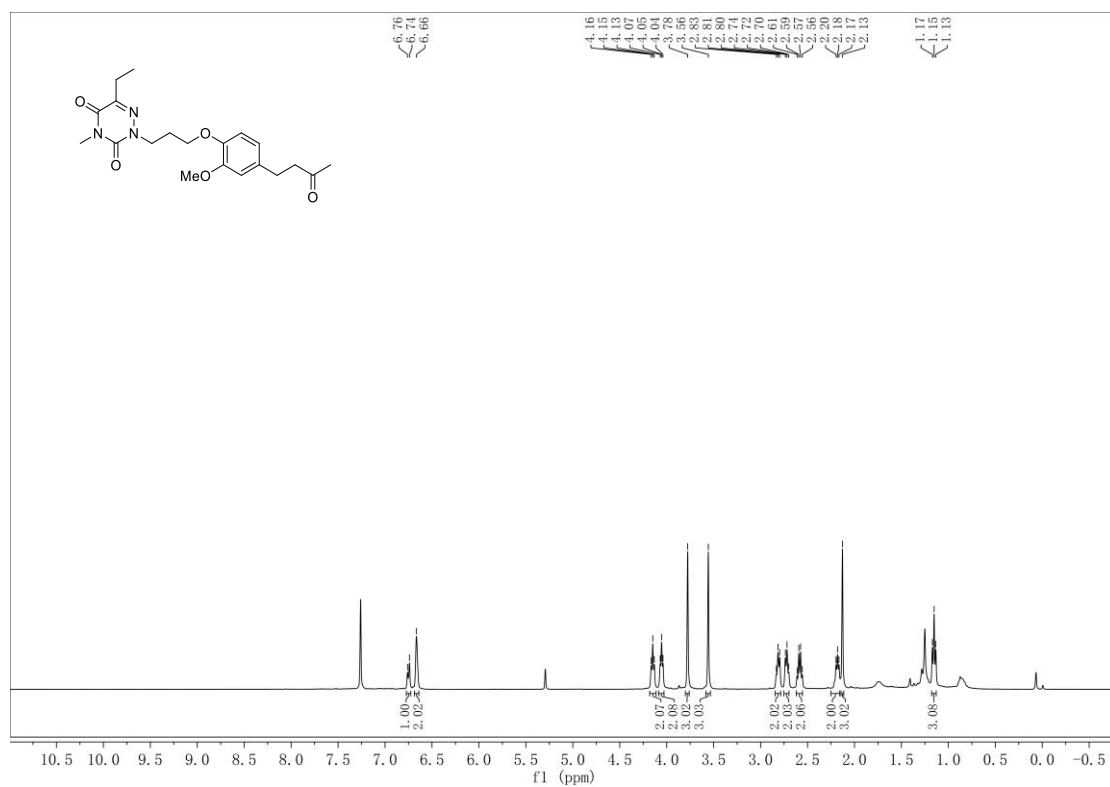

**3t-<sup>13</sup>C**

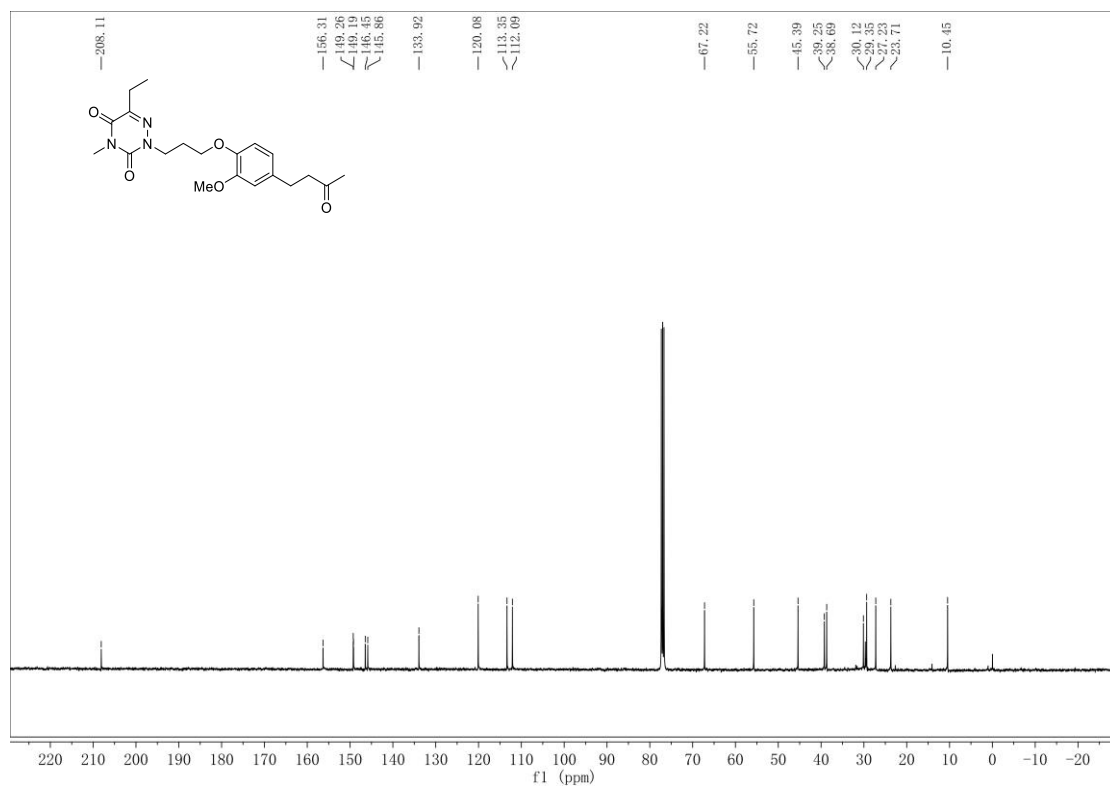



### 3u-<sup>1</sup>H

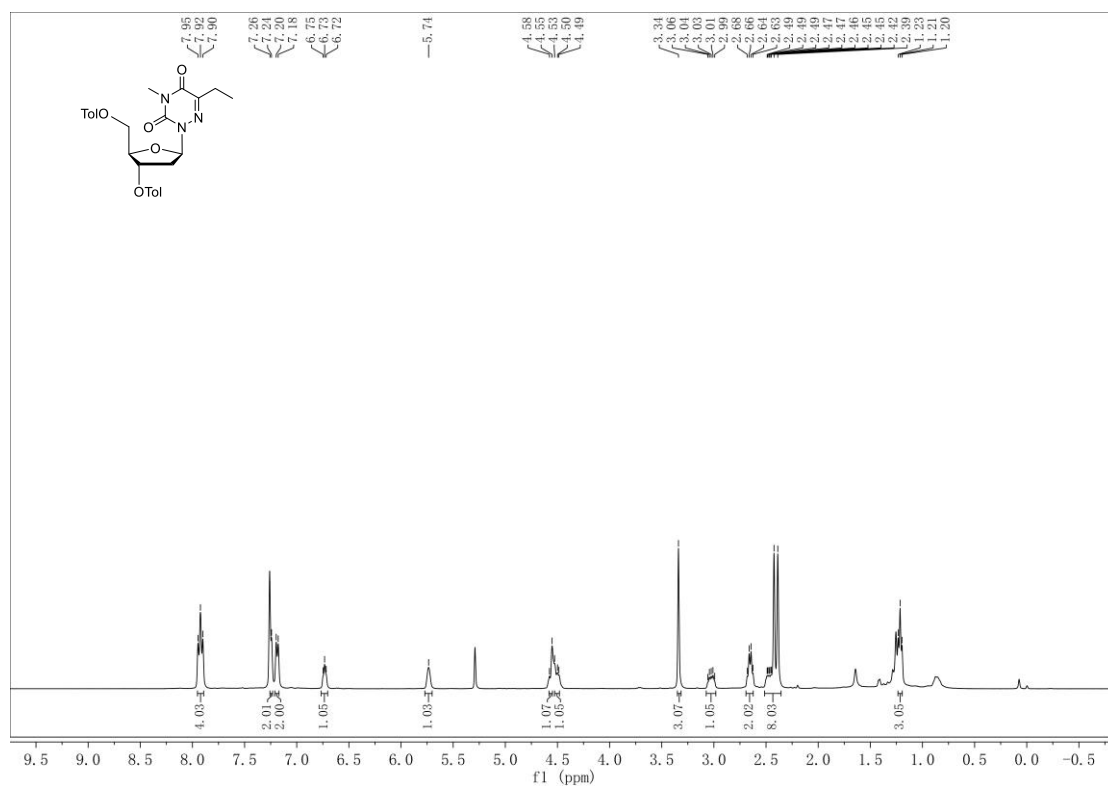

### 3u-<sup>13</sup>C

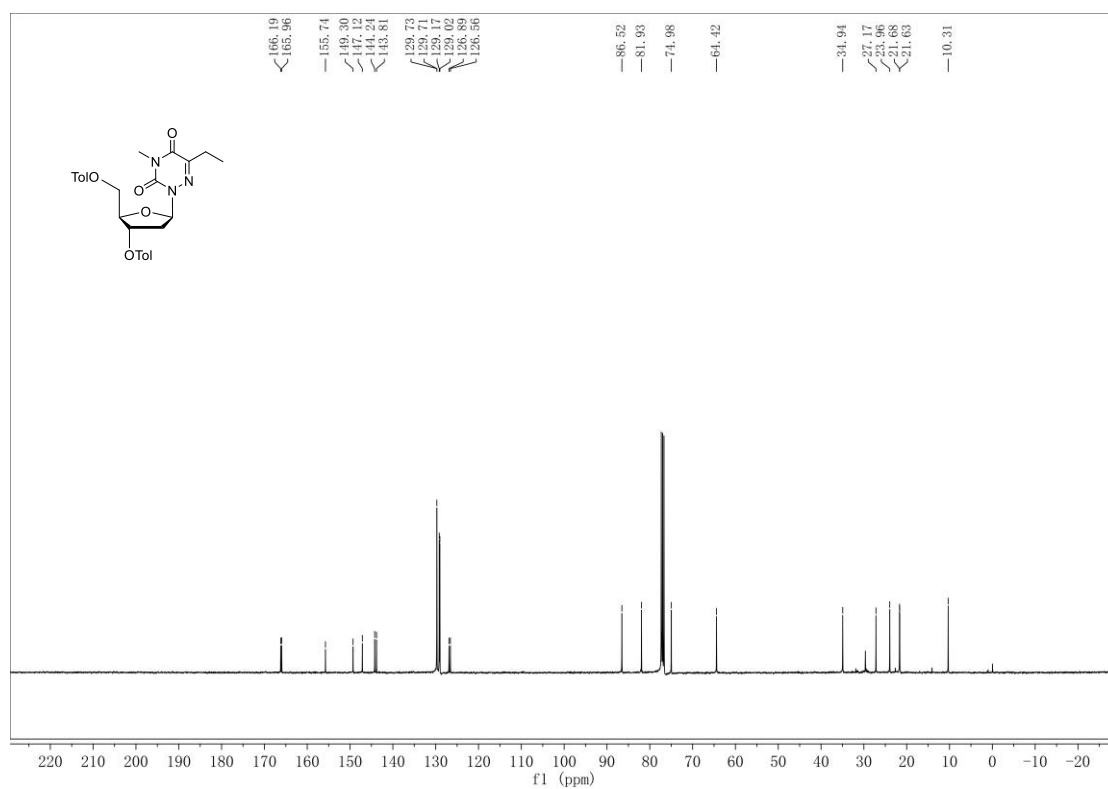

**3v-<sup>1</sup>H**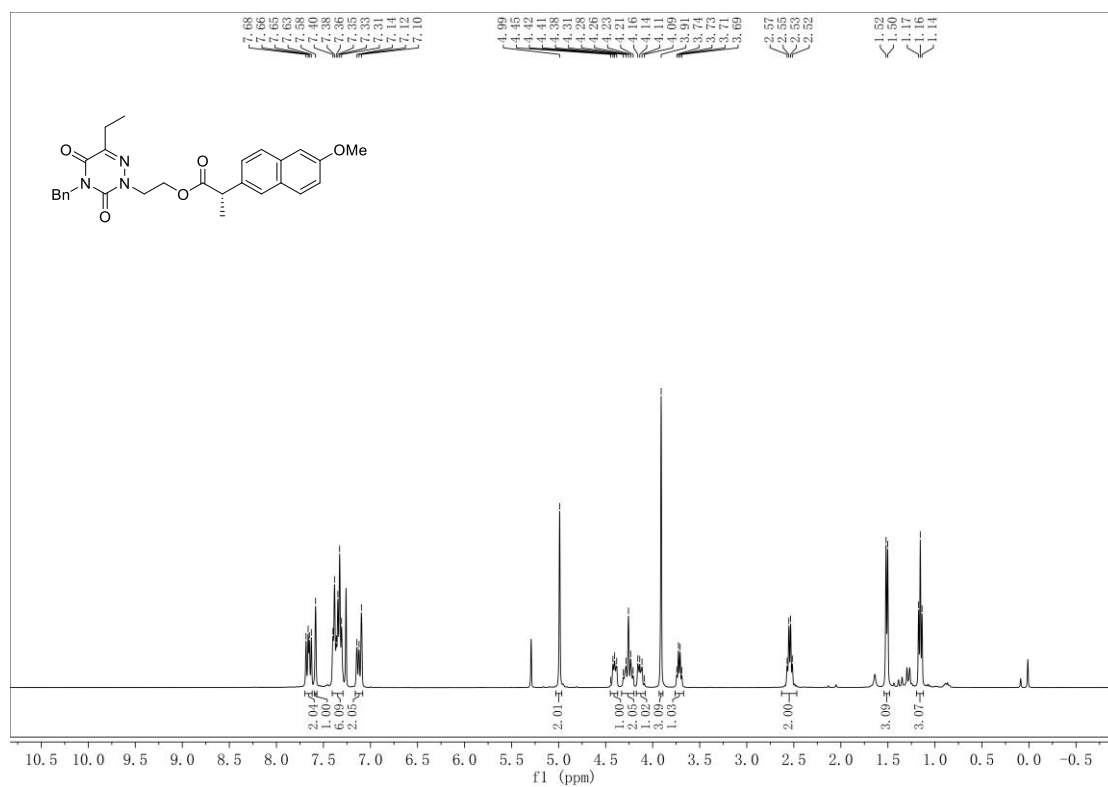**3v-<sup>13</sup>C**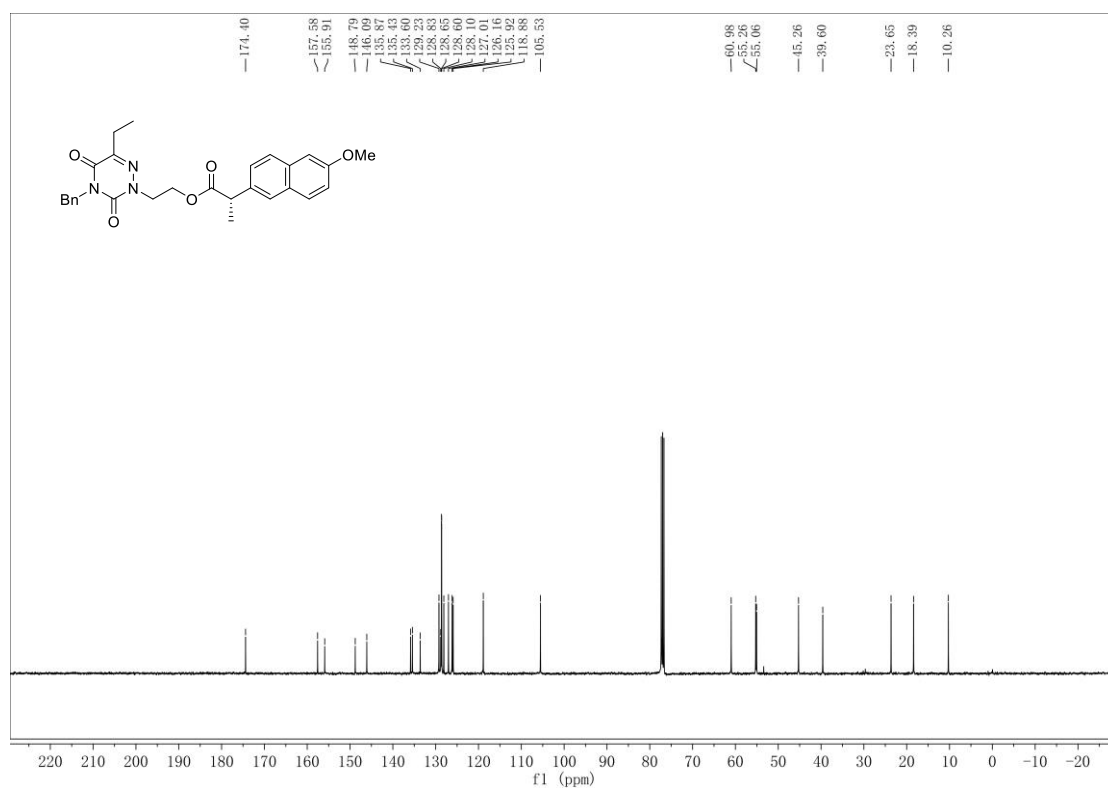

**3w-<sup>1</sup>H**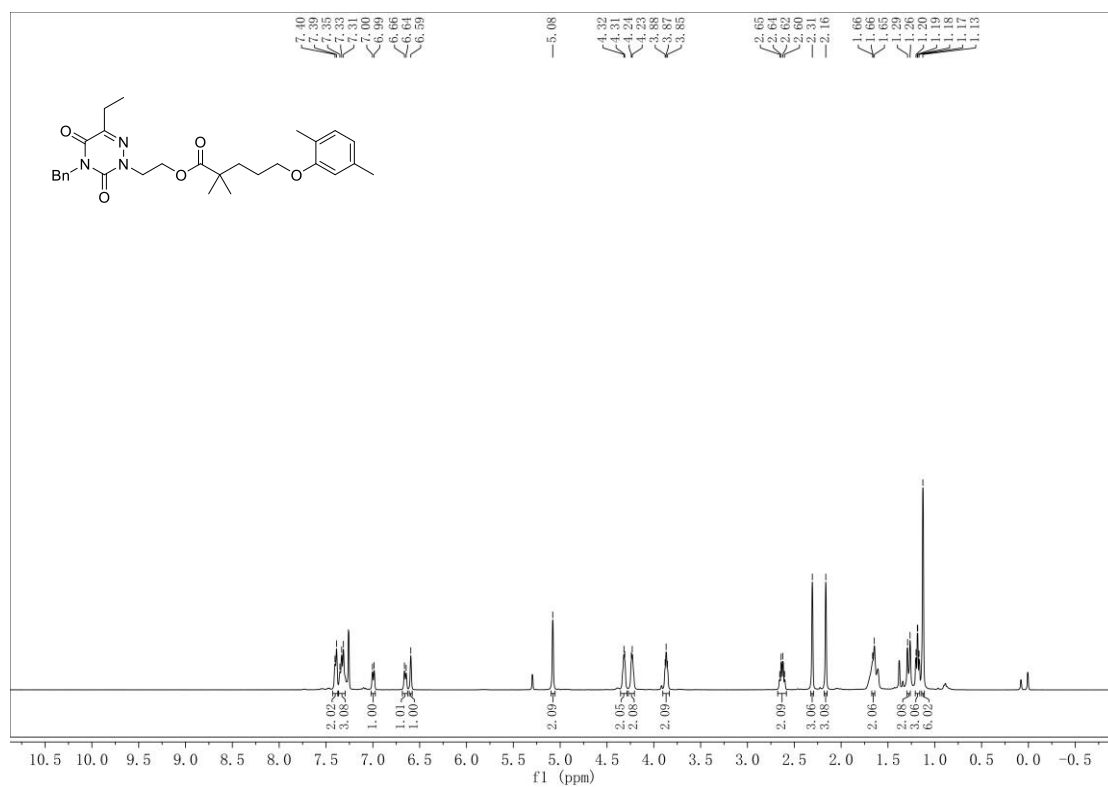**3w-<sup>13</sup>C**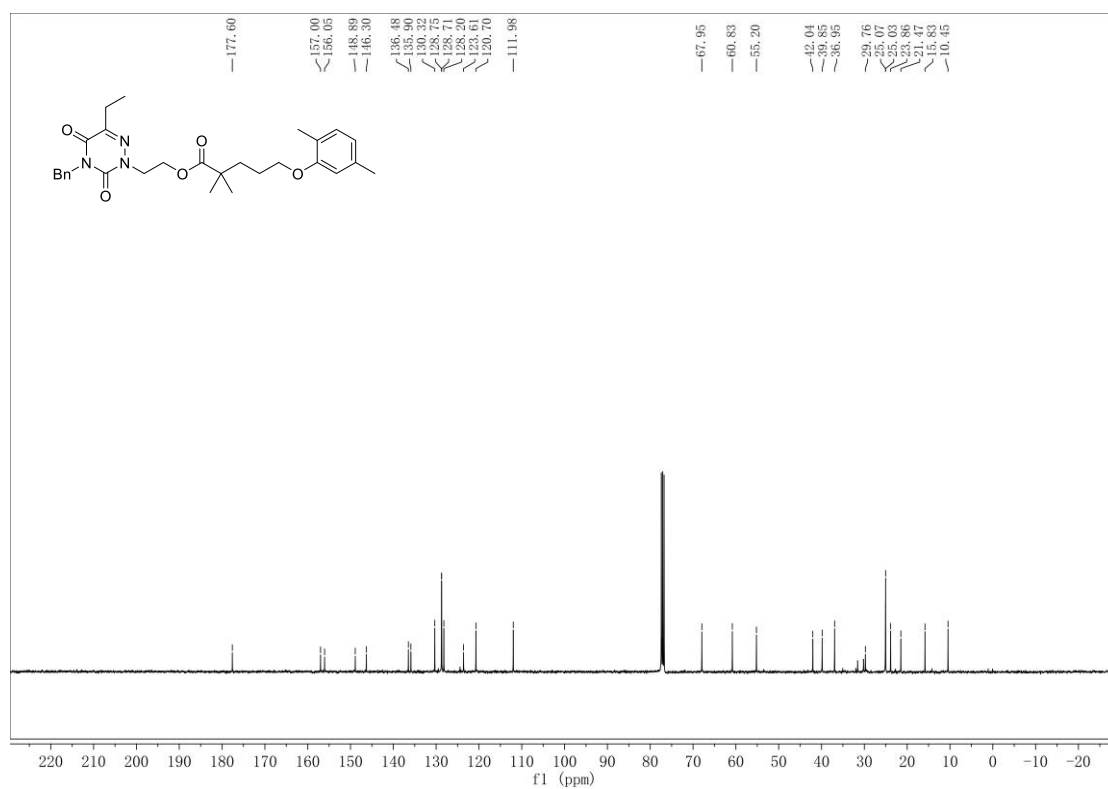

**3x-<sup>1</sup>H**

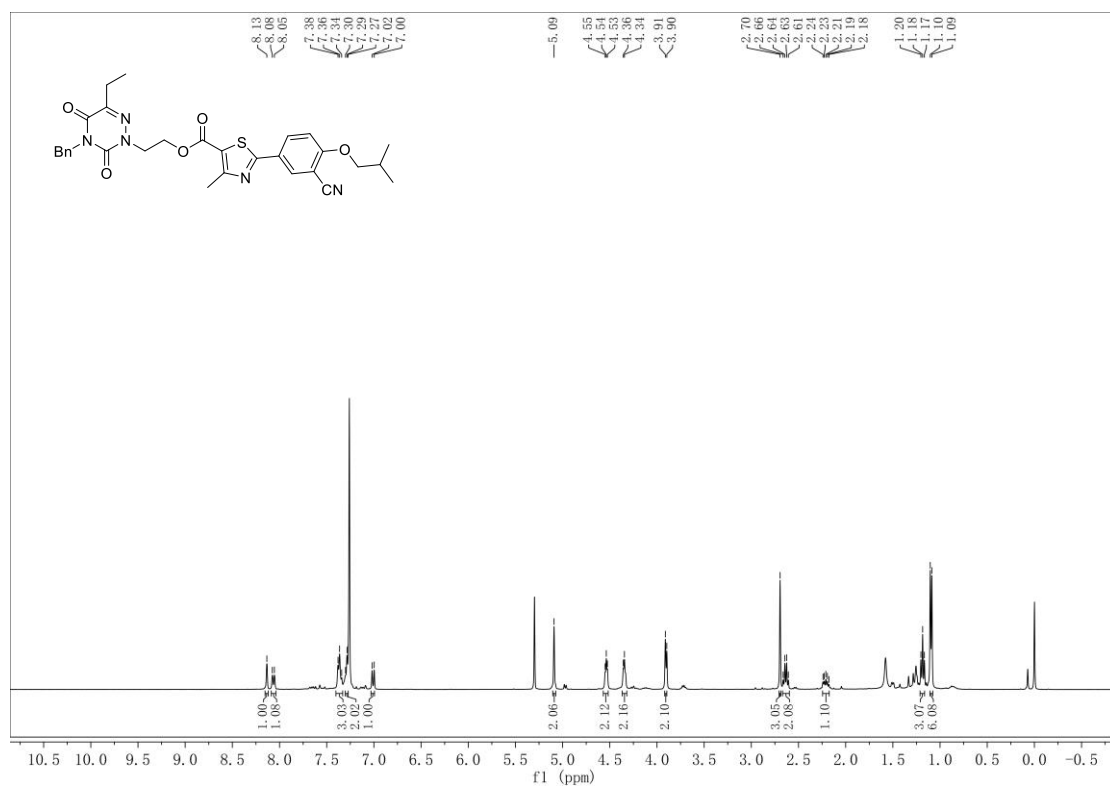

**3x-<sup>13</sup>C**

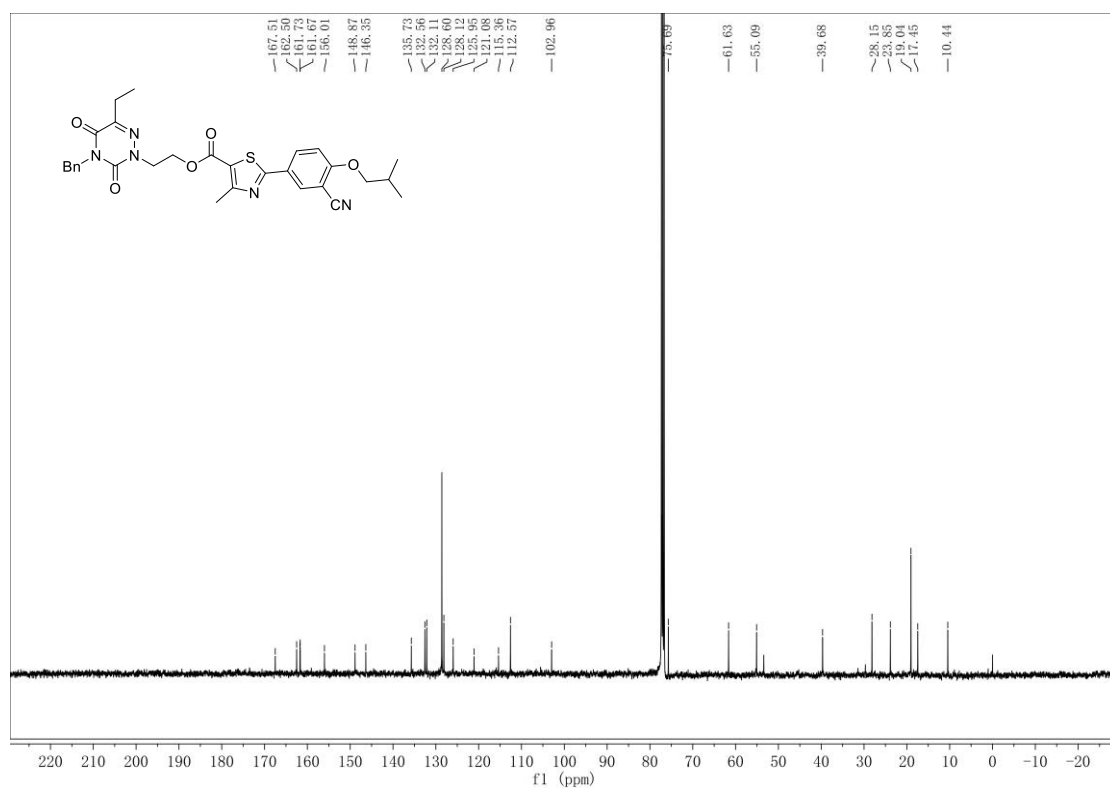

4a-<sup>1</sup>H

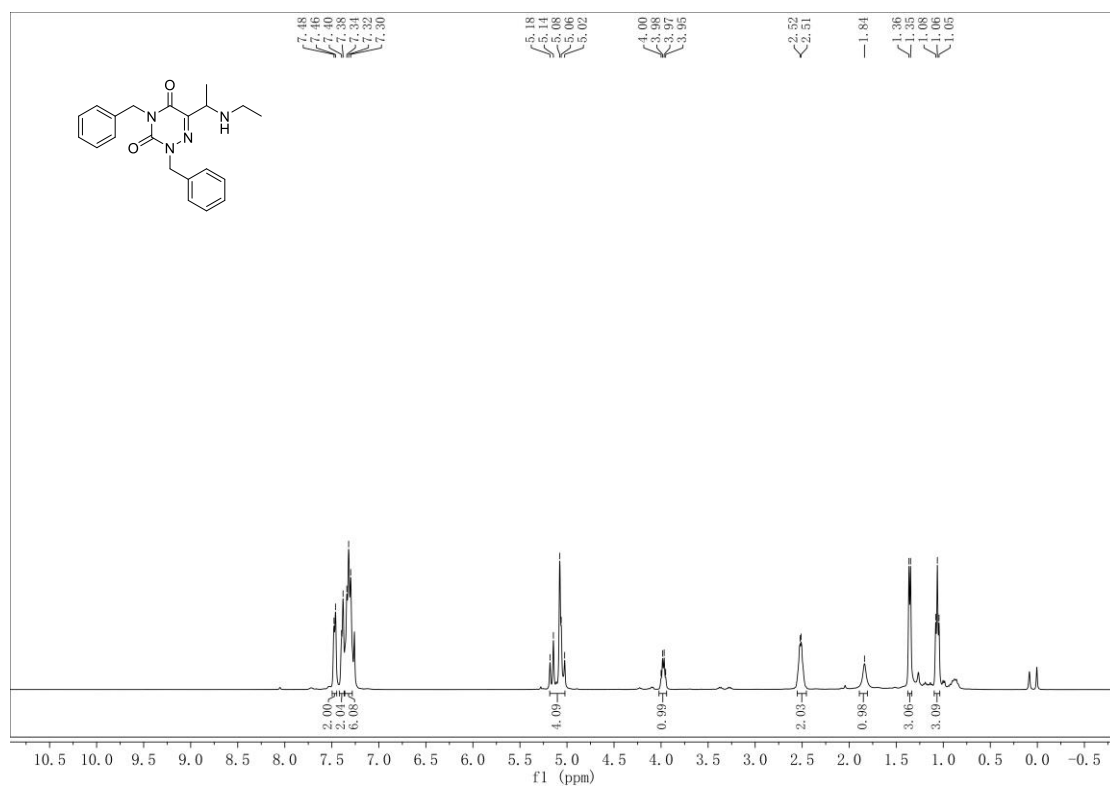

4a-<sup>13</sup>C

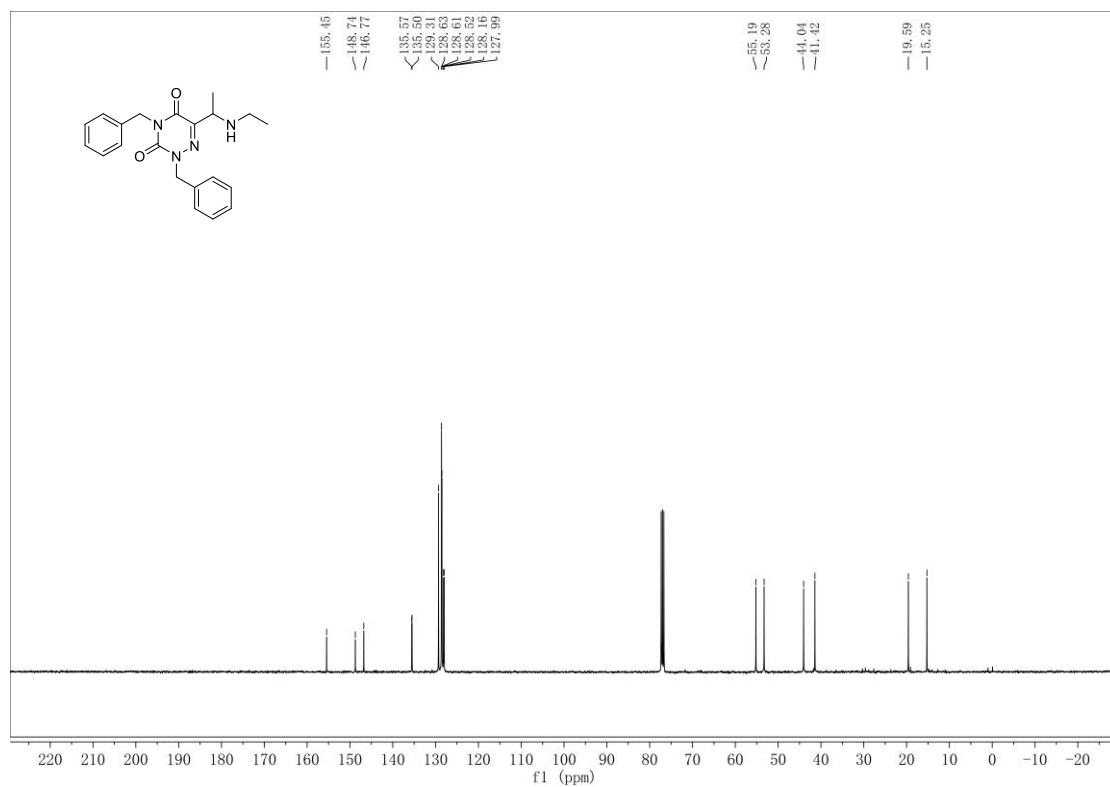

**4b-<sup>1</sup>H**

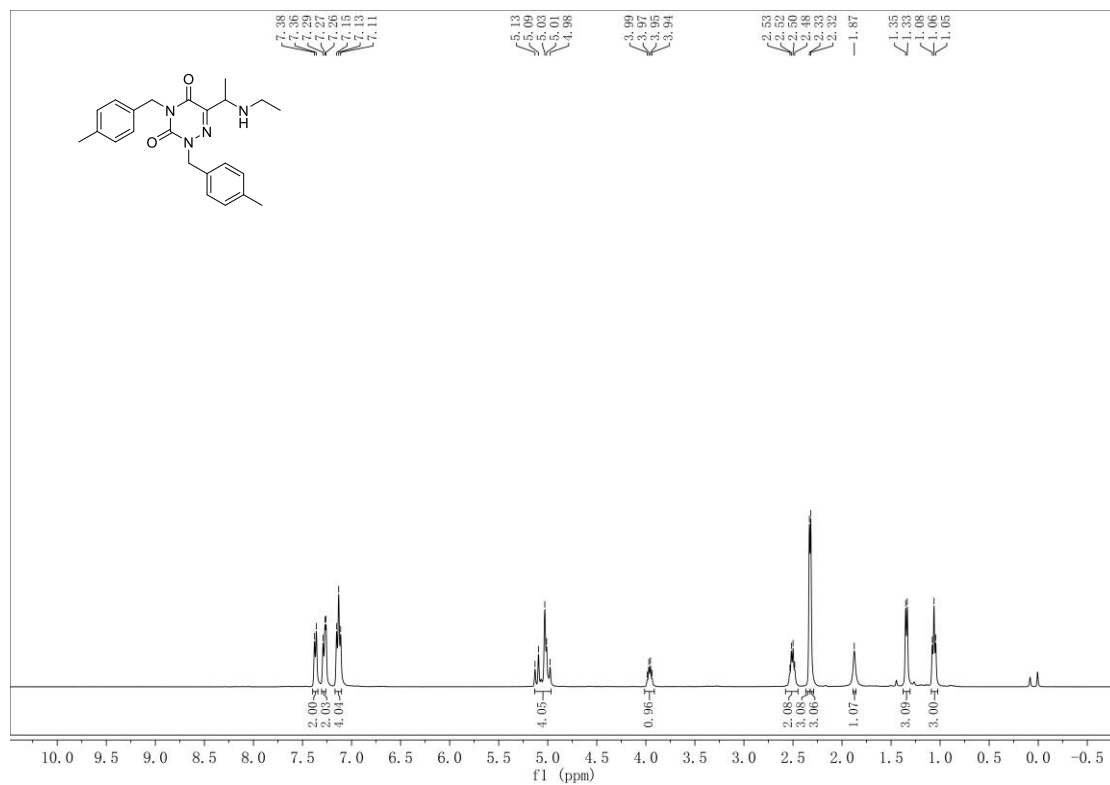

**4b-<sup>13</sup>C**

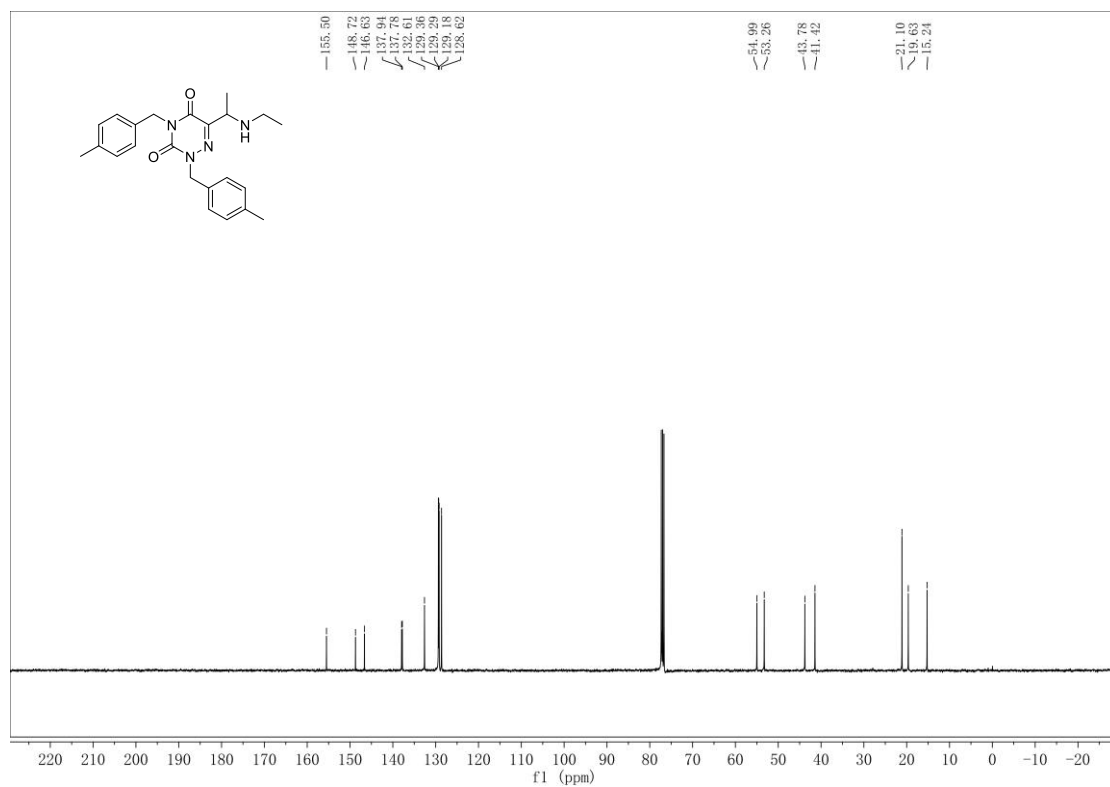

**4c-<sup>1</sup>H**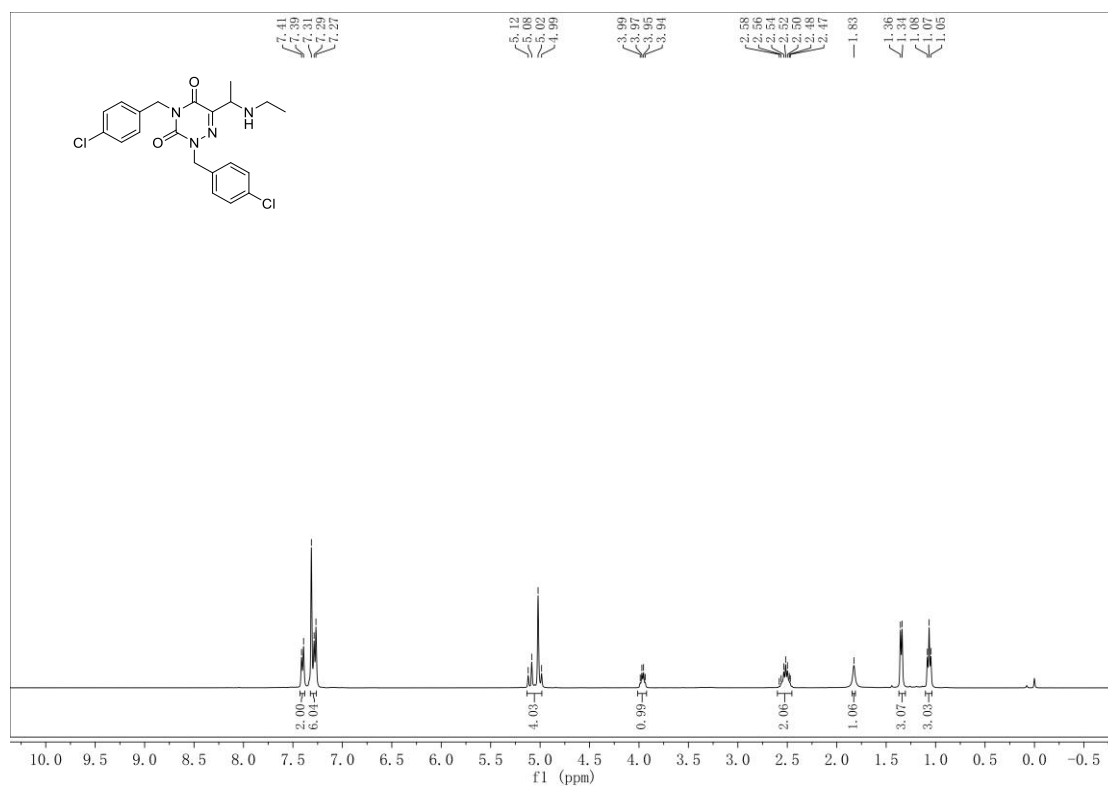**4c-<sup>13</sup>C**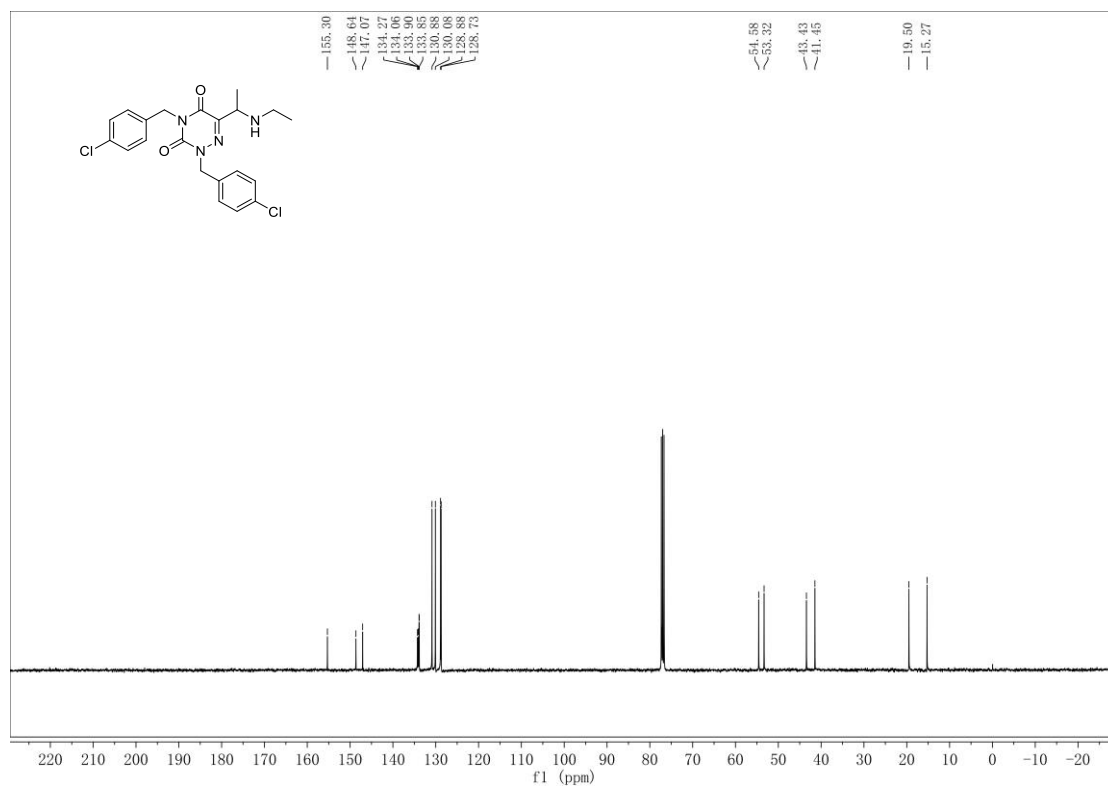

4d-<sup>1</sup>H

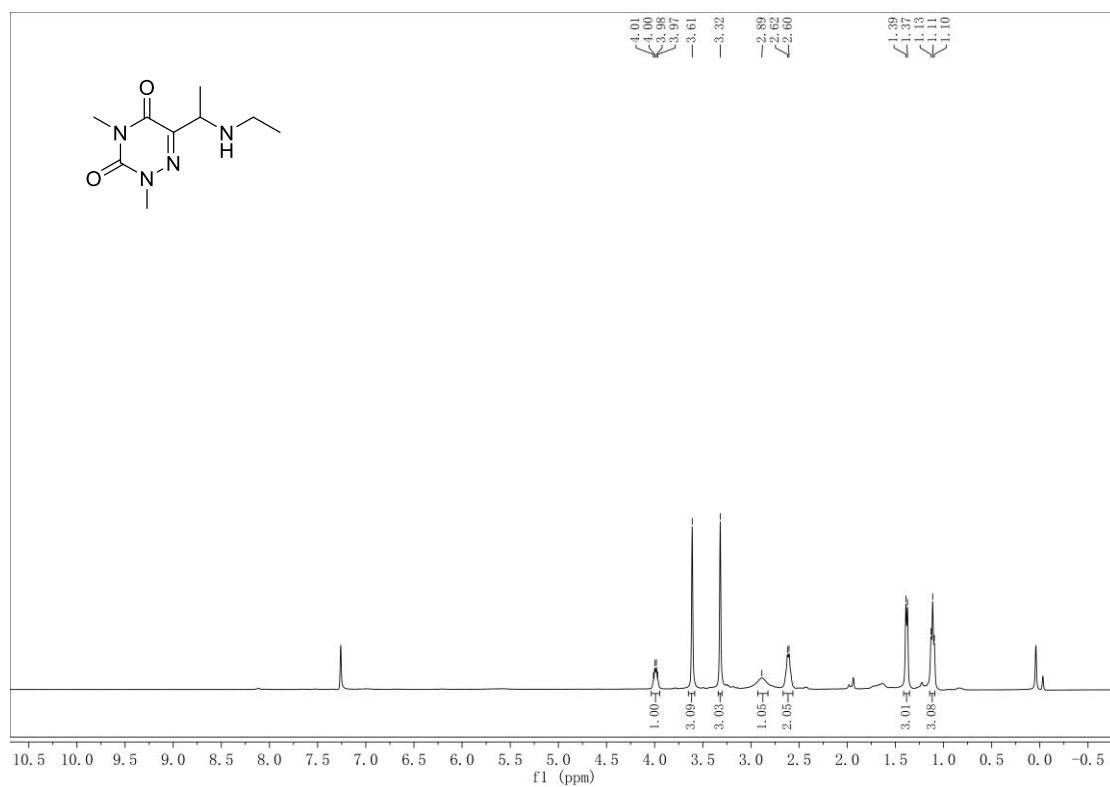

4d-<sup>13</sup>C

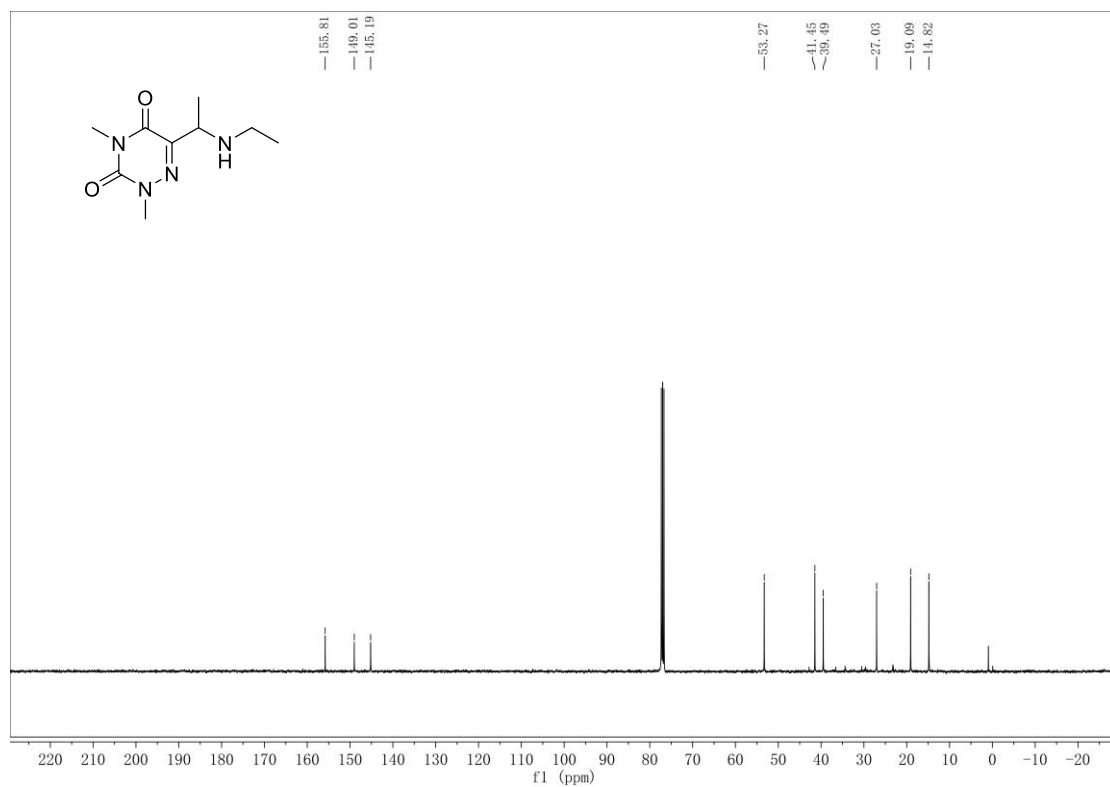



4e-<sup>1</sup>H

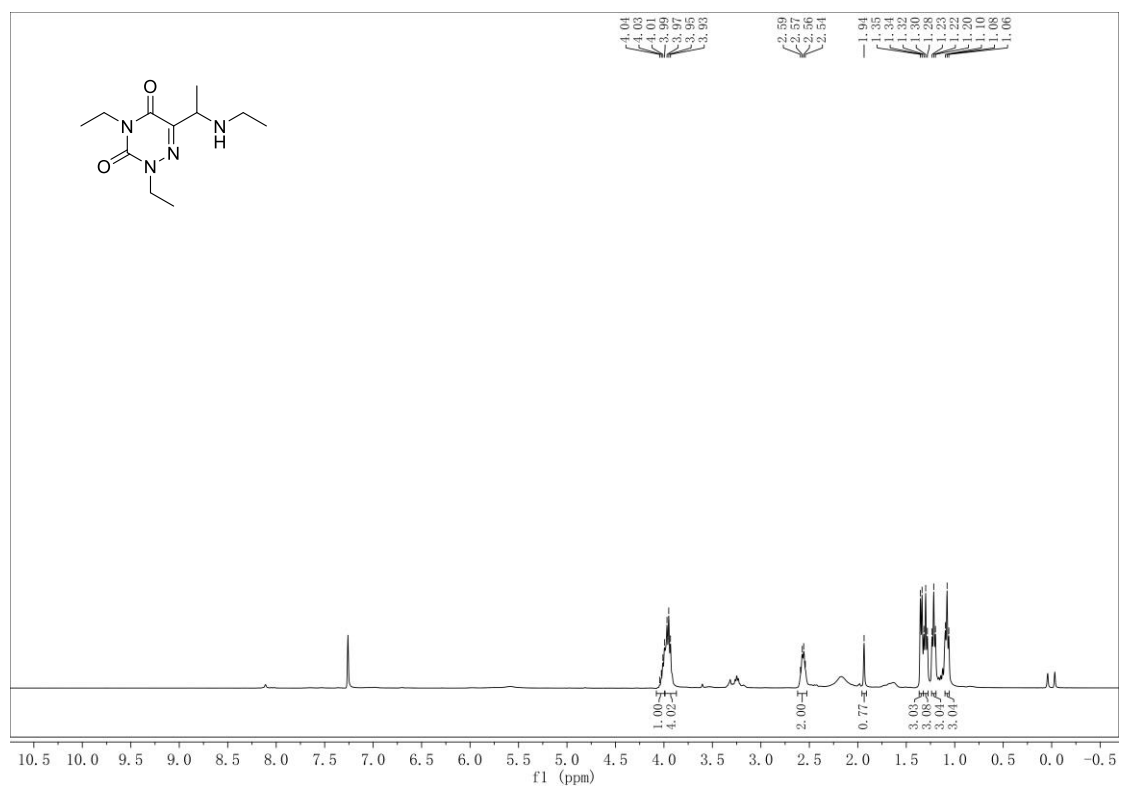

4e-<sup>13</sup>C

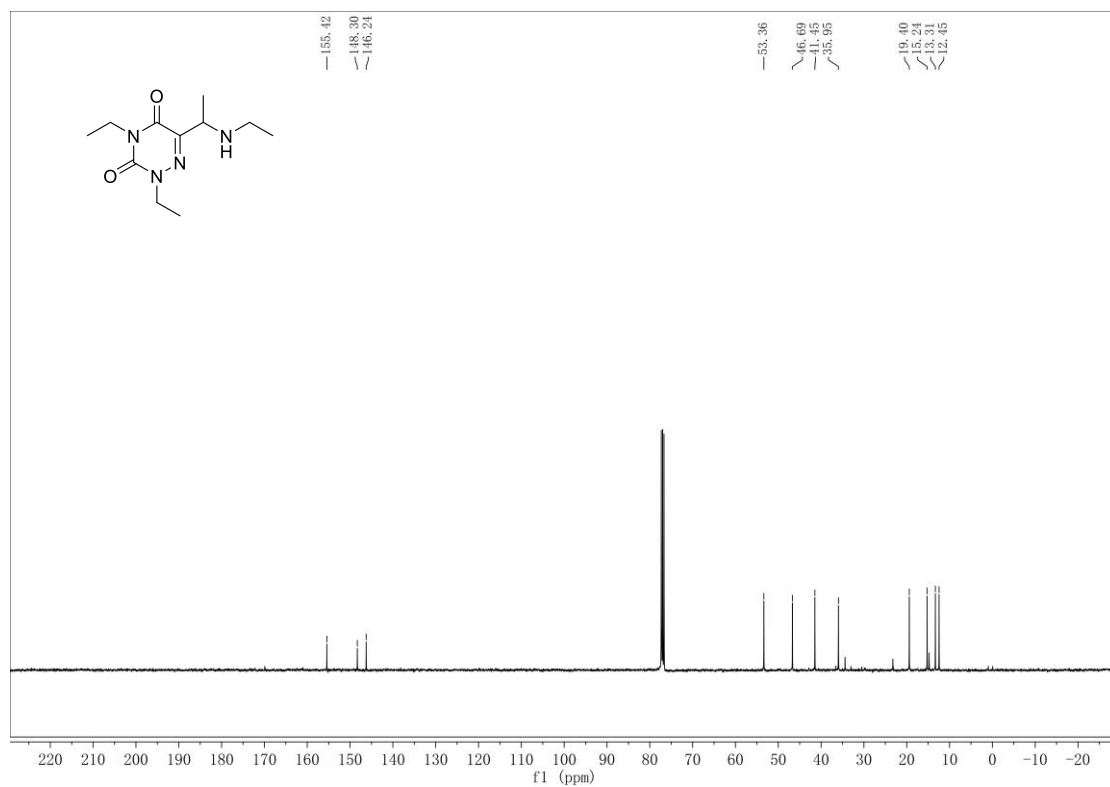

**4f-<sup>1</sup>H**

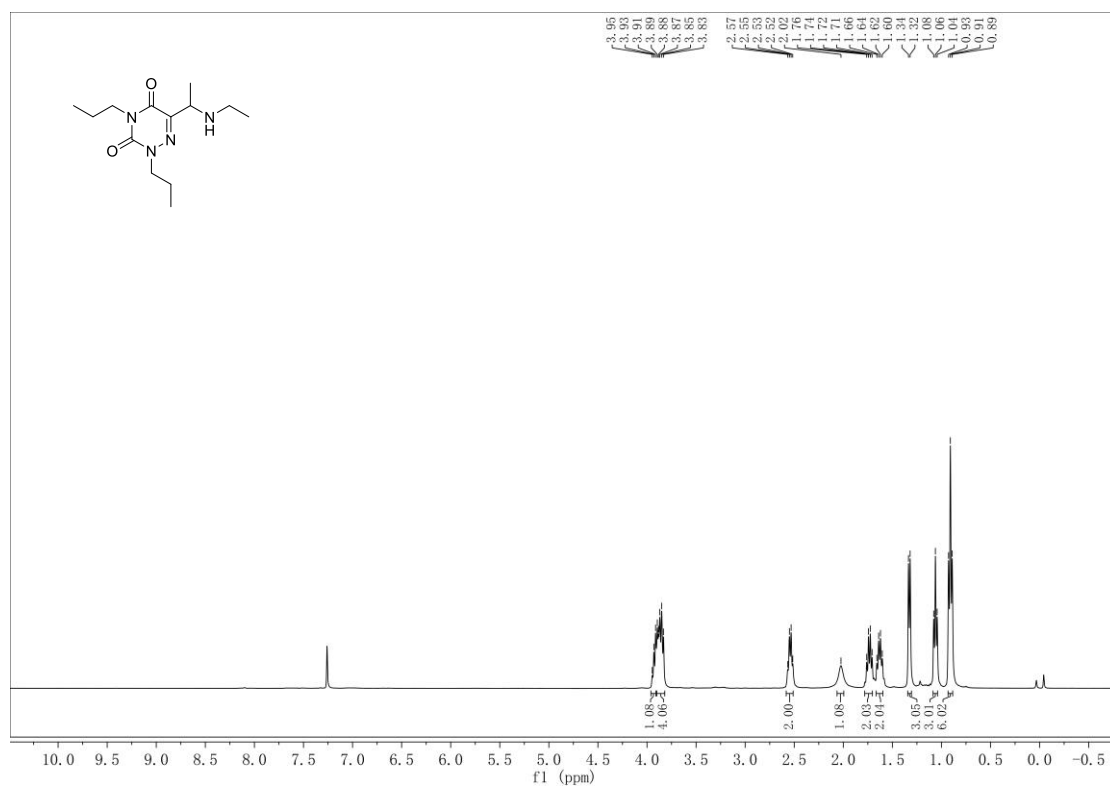

**4f-<sup>13</sup>C**

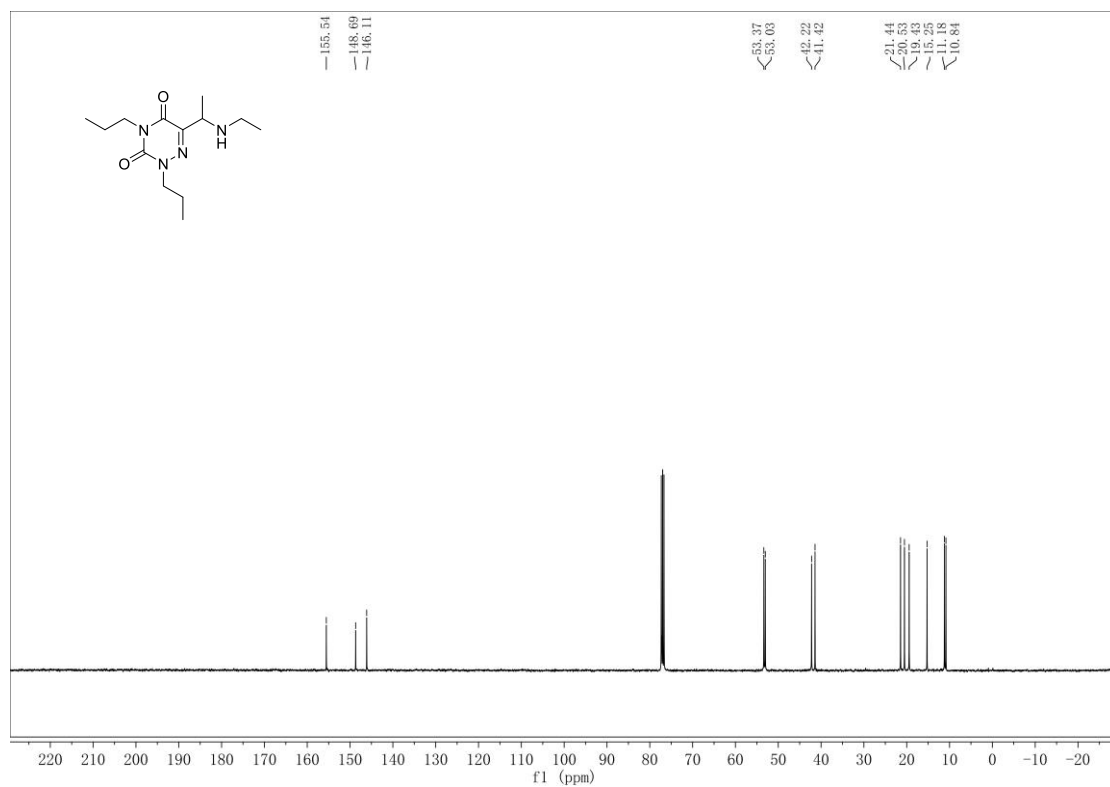

4g-<sup>1</sup>H

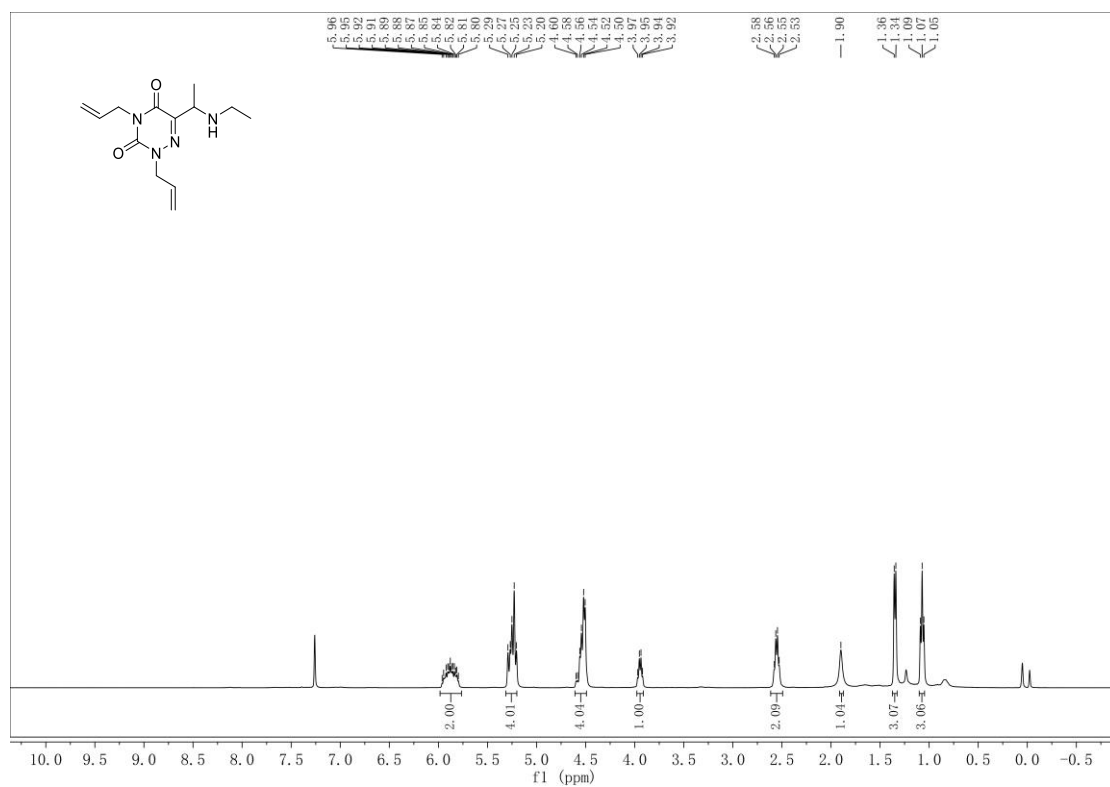

4g-<sup>13</sup>C

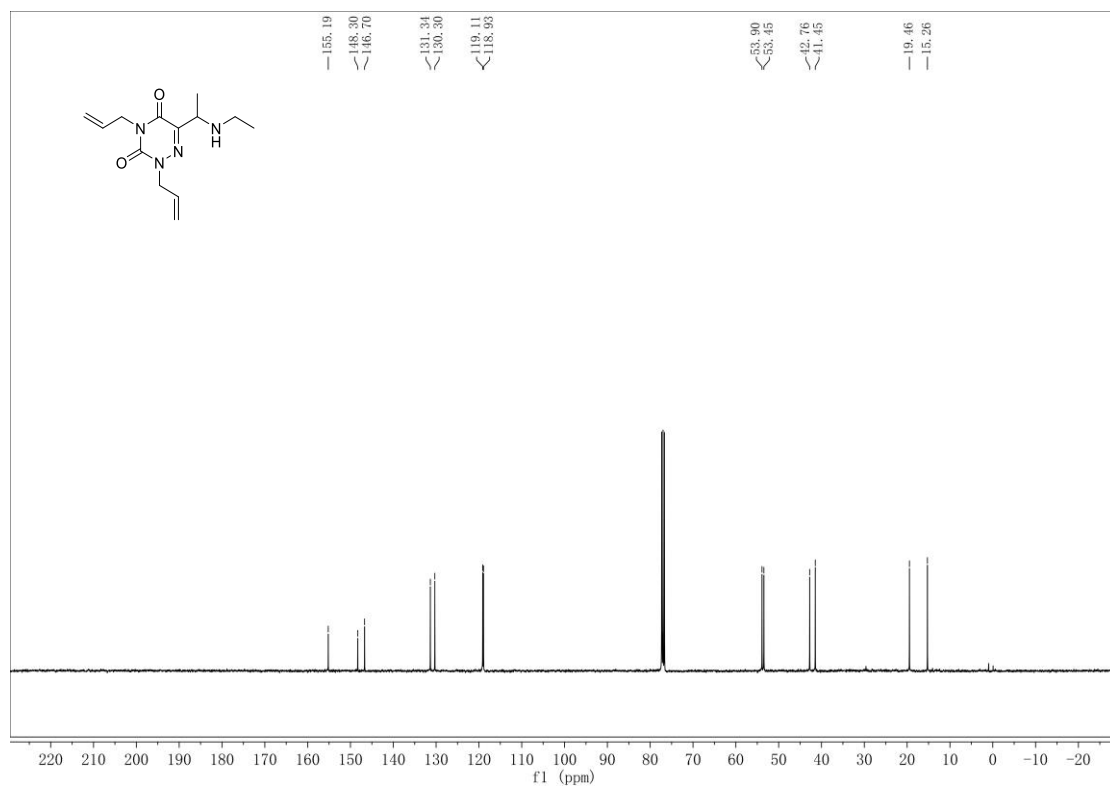

4h-<sup>1</sup>H

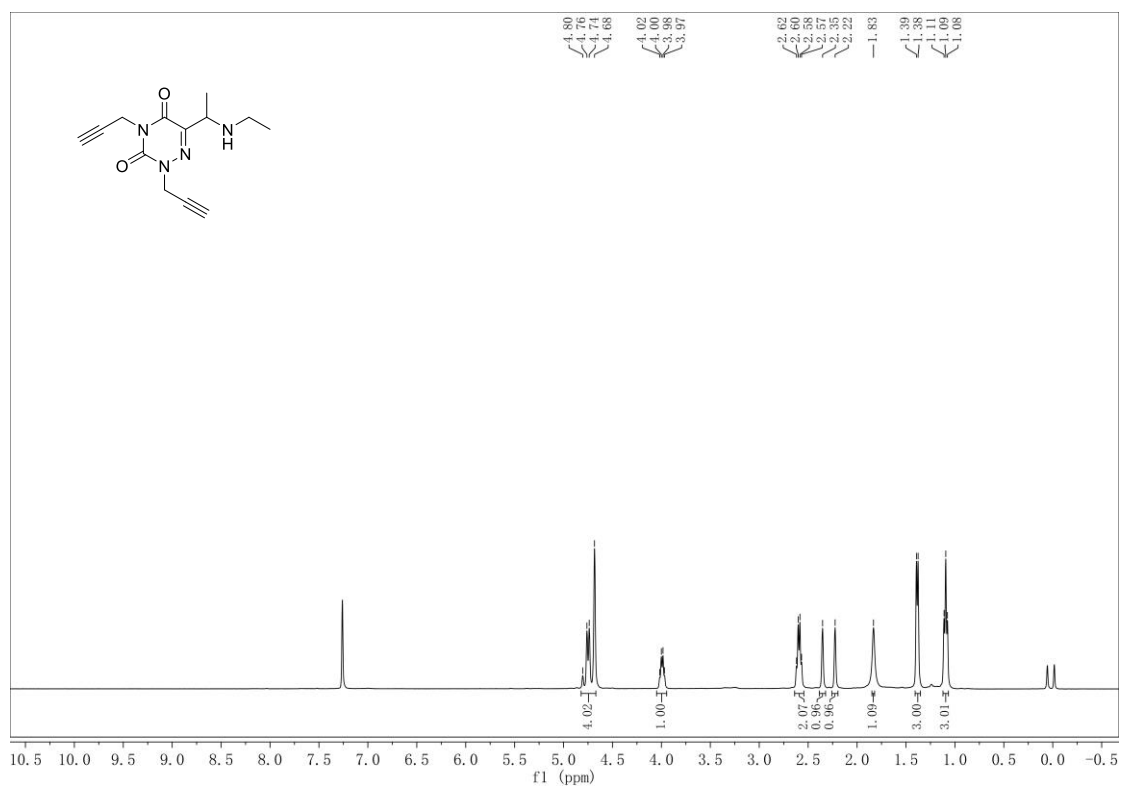

4h-<sup>13</sup>C

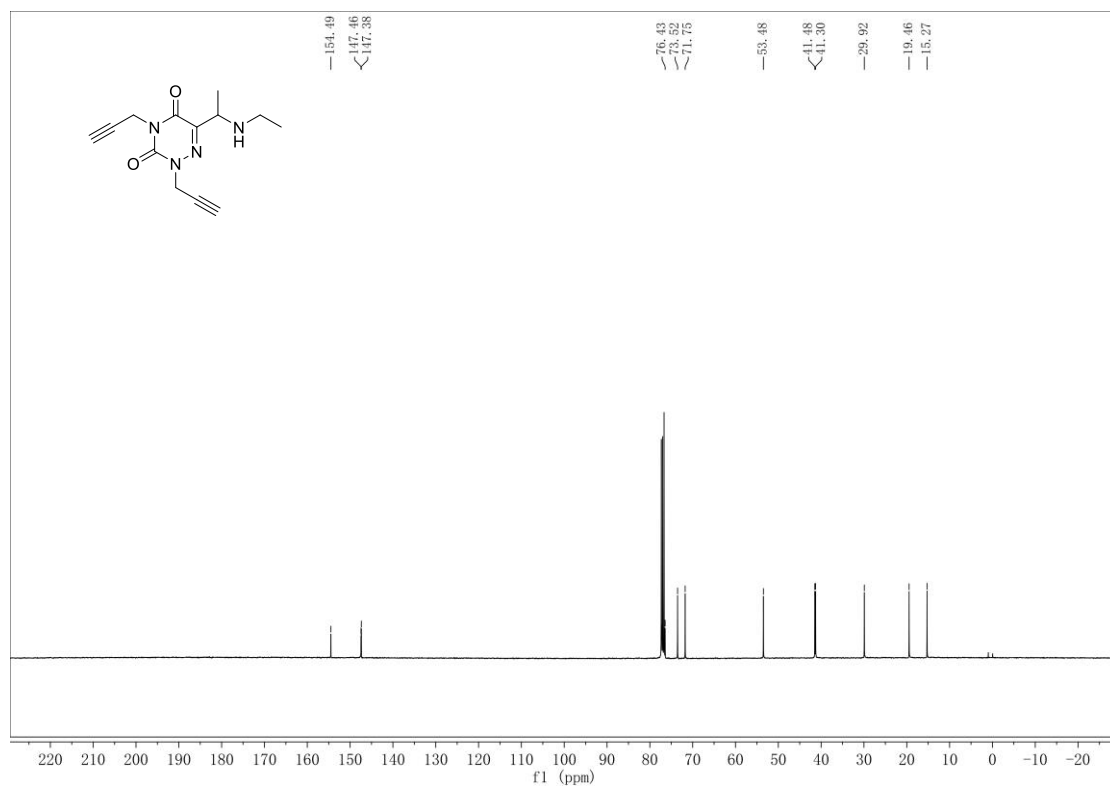

**4i-<sup>1</sup>H**

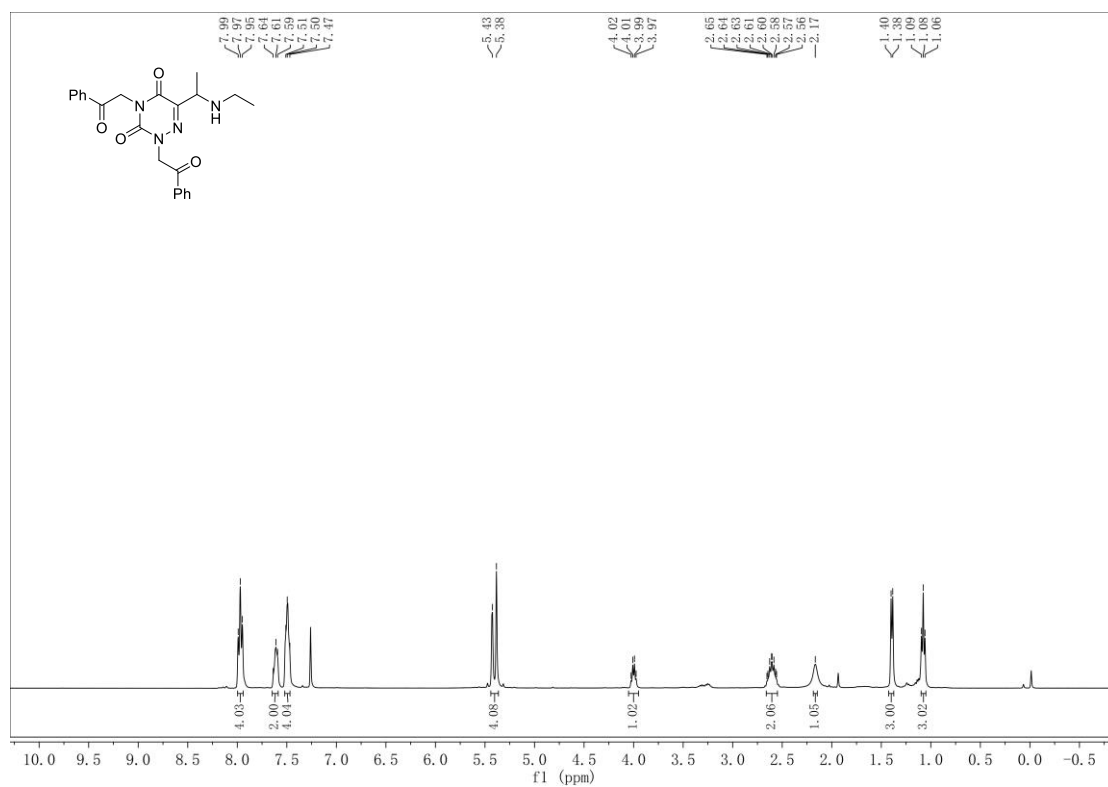

**4i-<sup>13</sup>C**

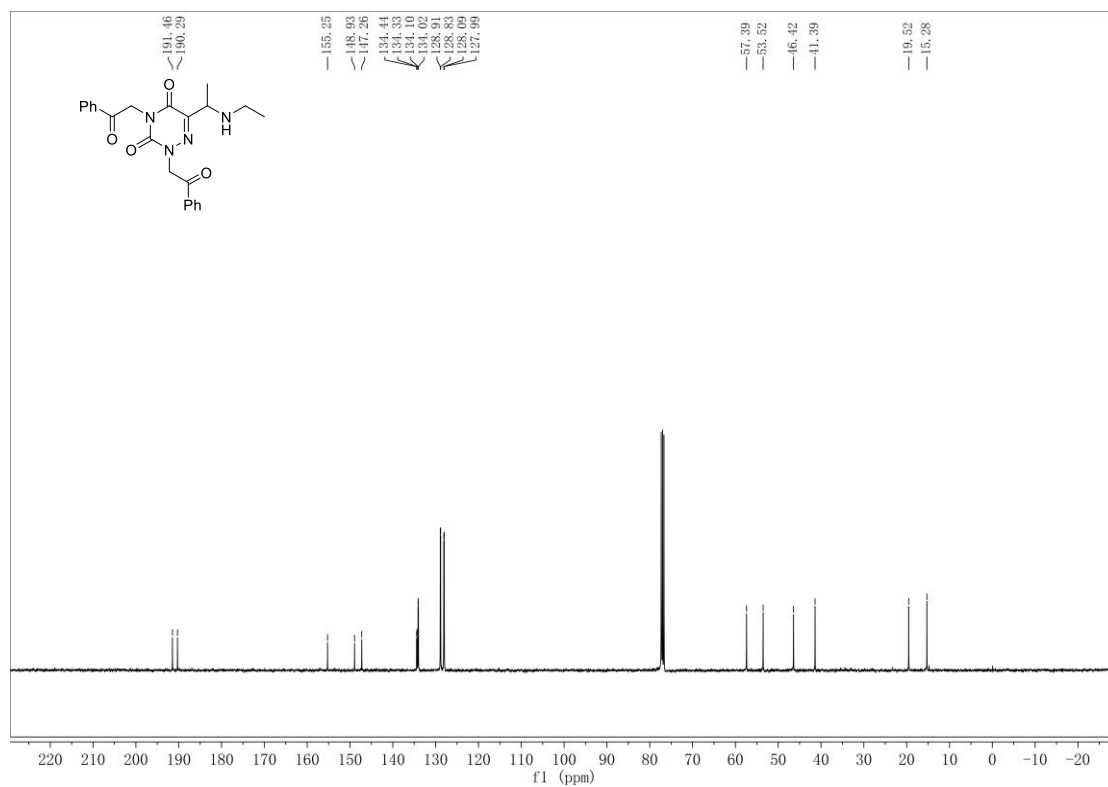

**4j-<sup>1</sup>H**

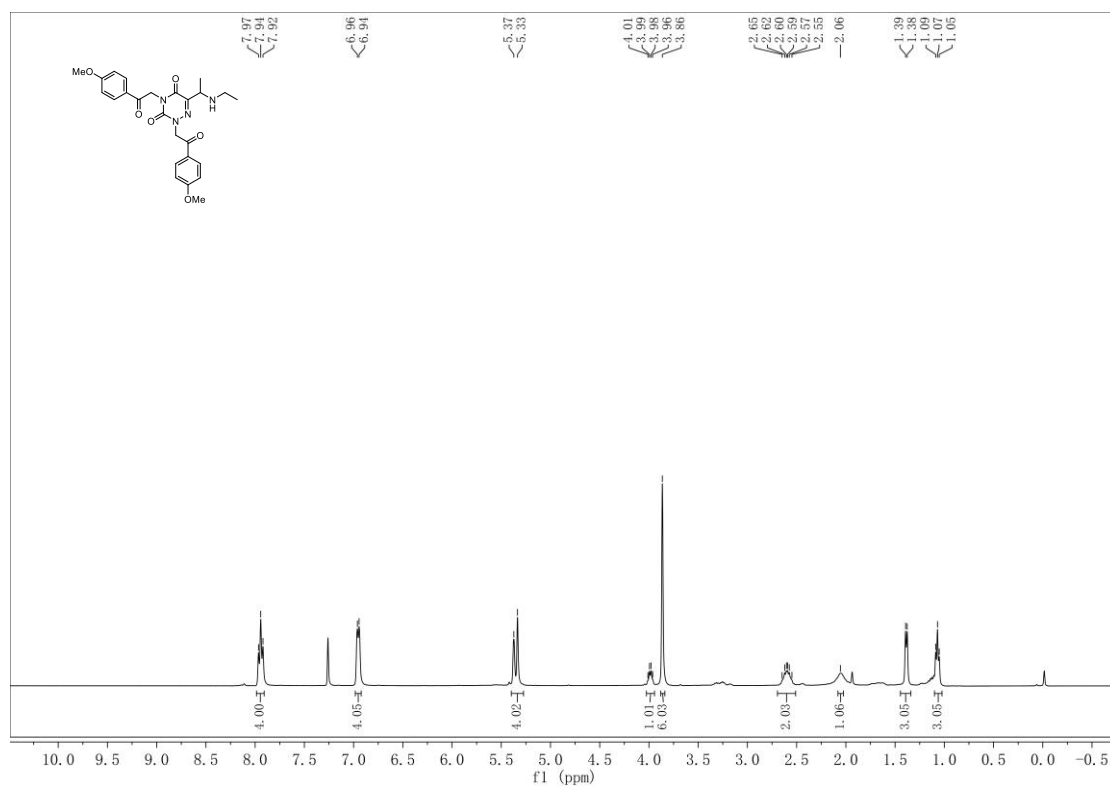

**4j-<sup>13</sup>C**

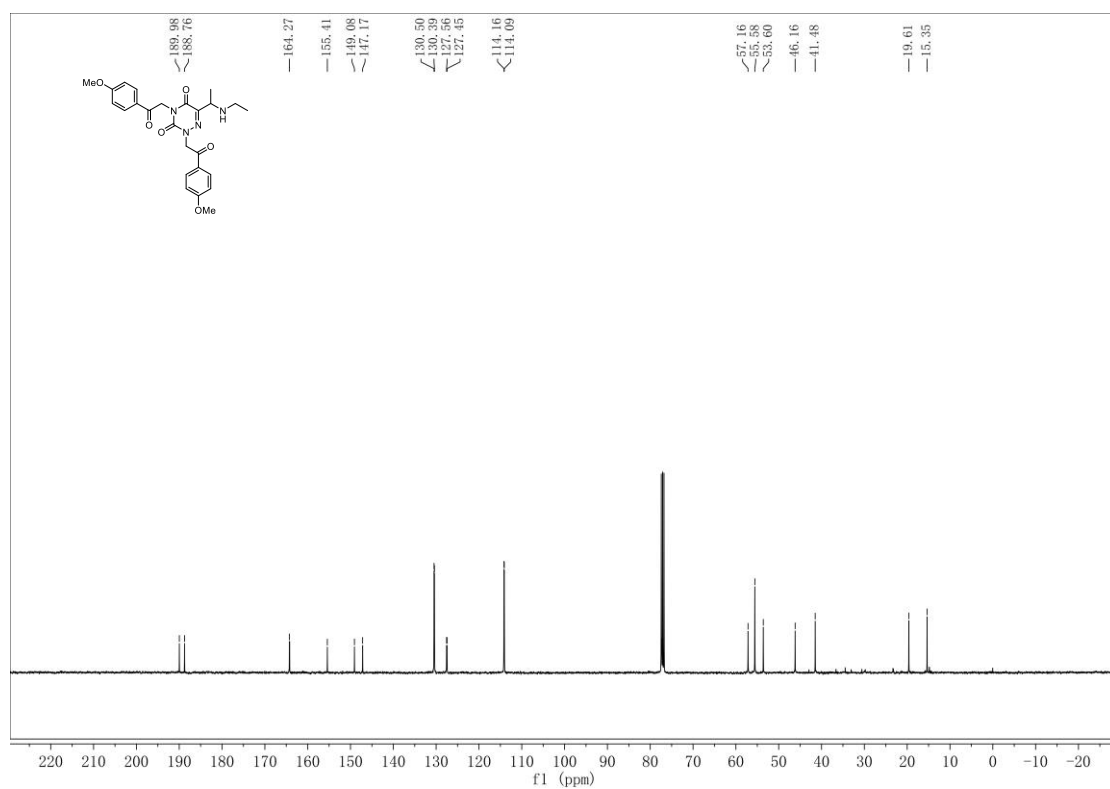

4k-<sup>1</sup>H

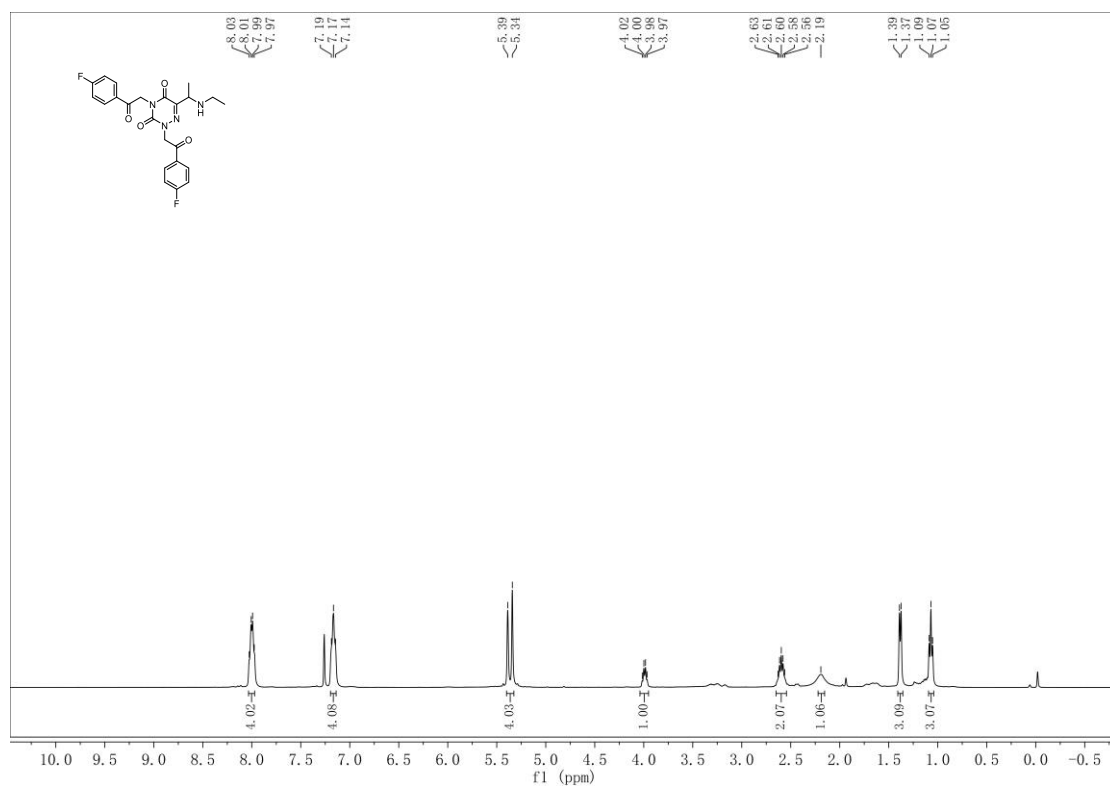

4k-<sup>13</sup>C

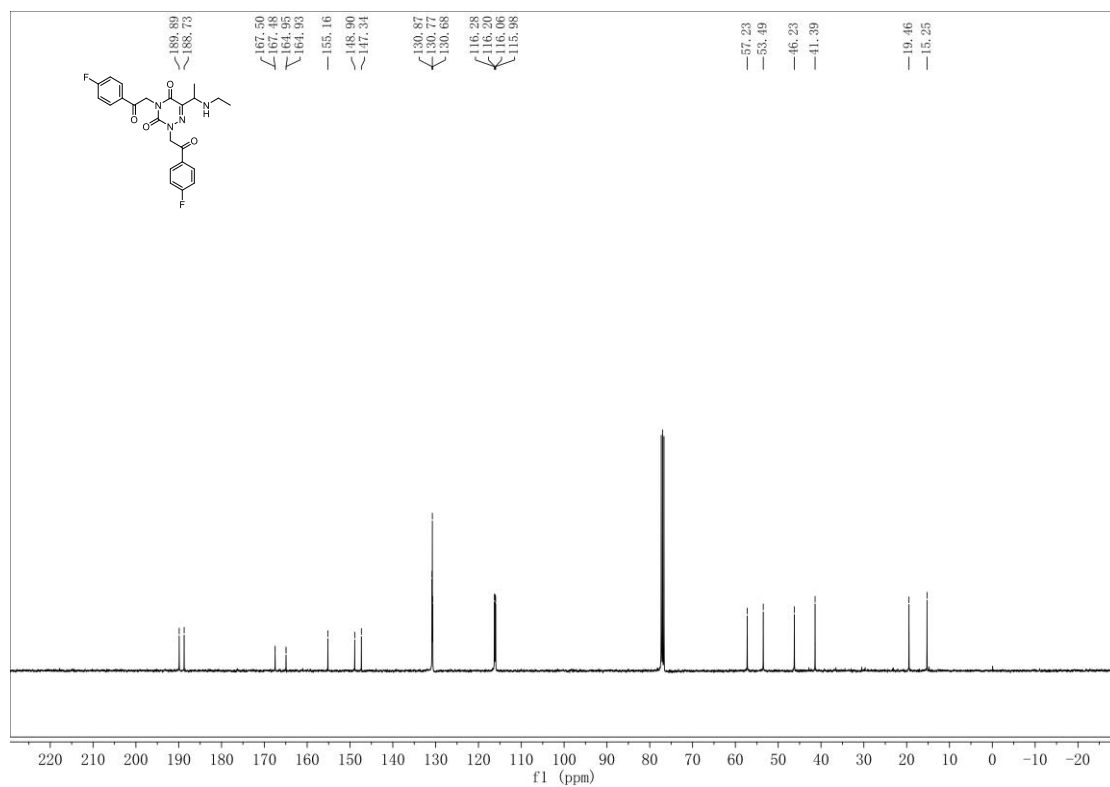

**4I-<sup>1</sup>H**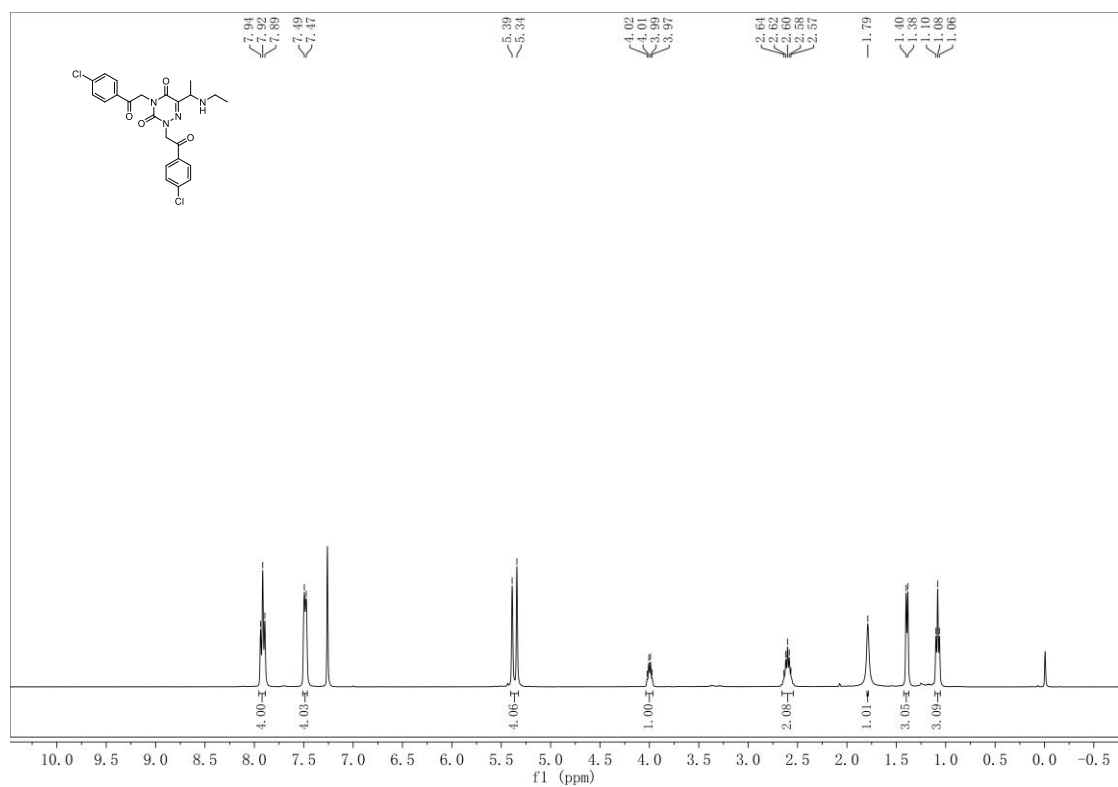**4I-<sup>13</sup>C**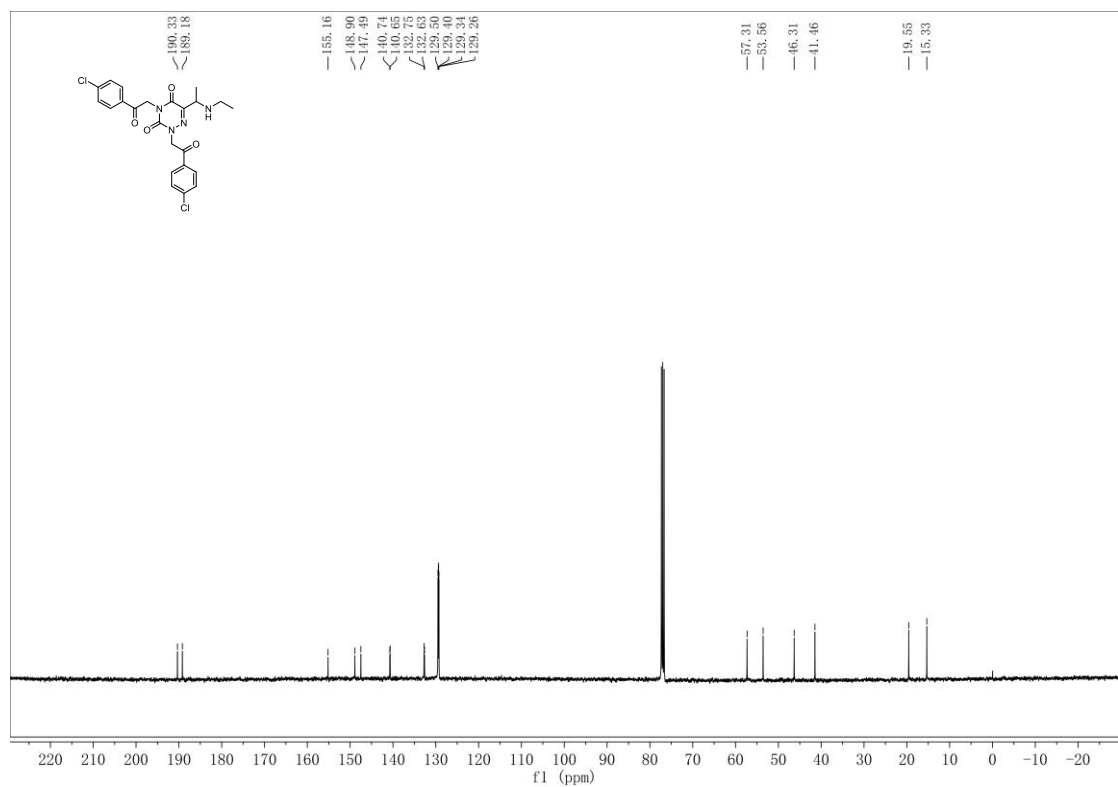



**4m-<sup>1</sup>H**

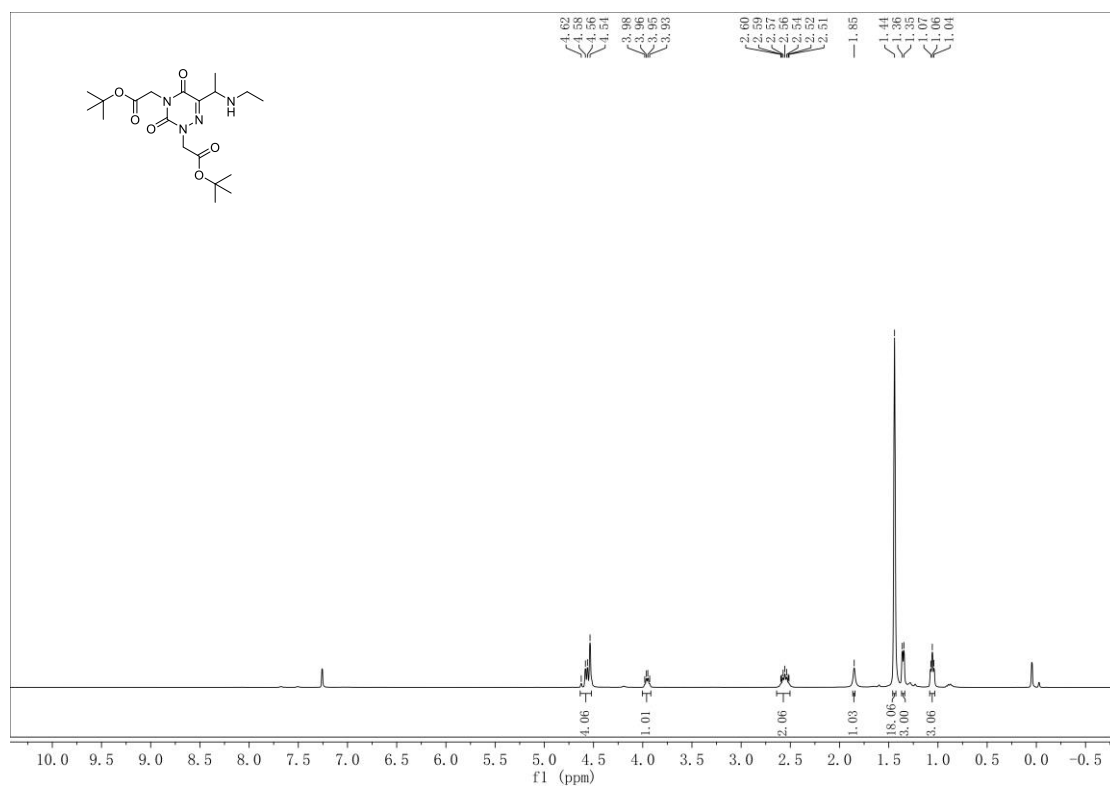

**4m-<sup>13</sup>C**

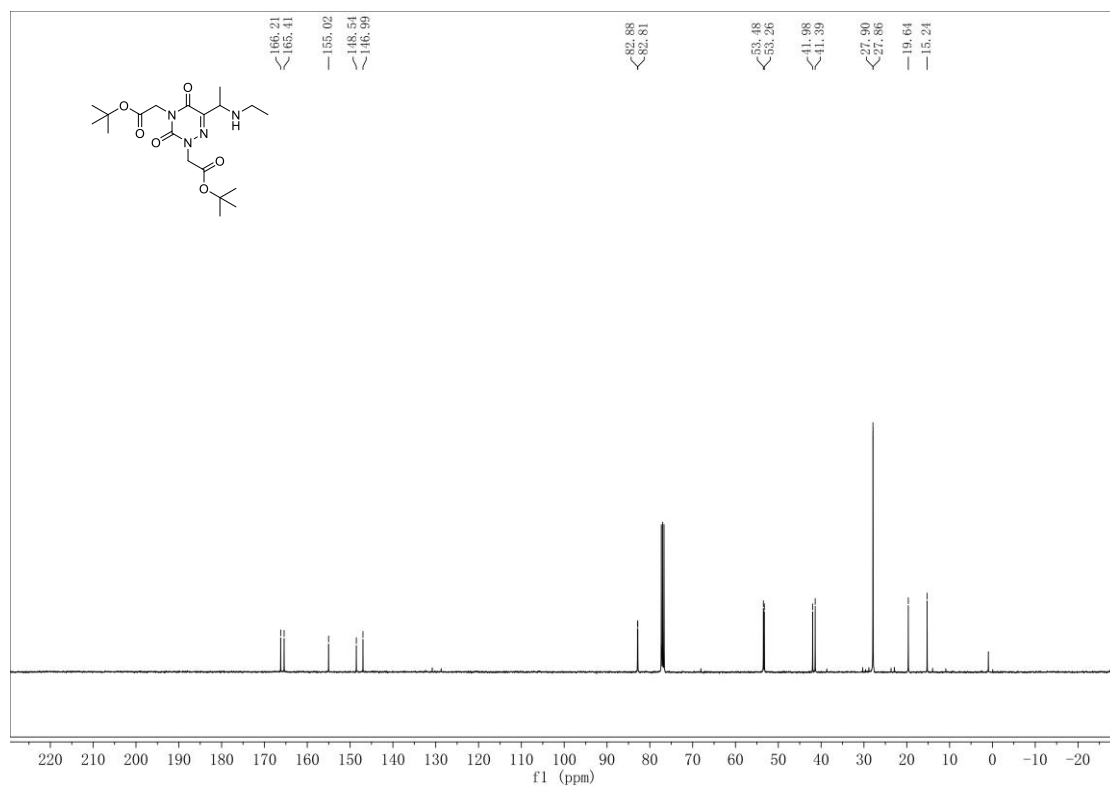

**4n-<sup>1</sup>H**

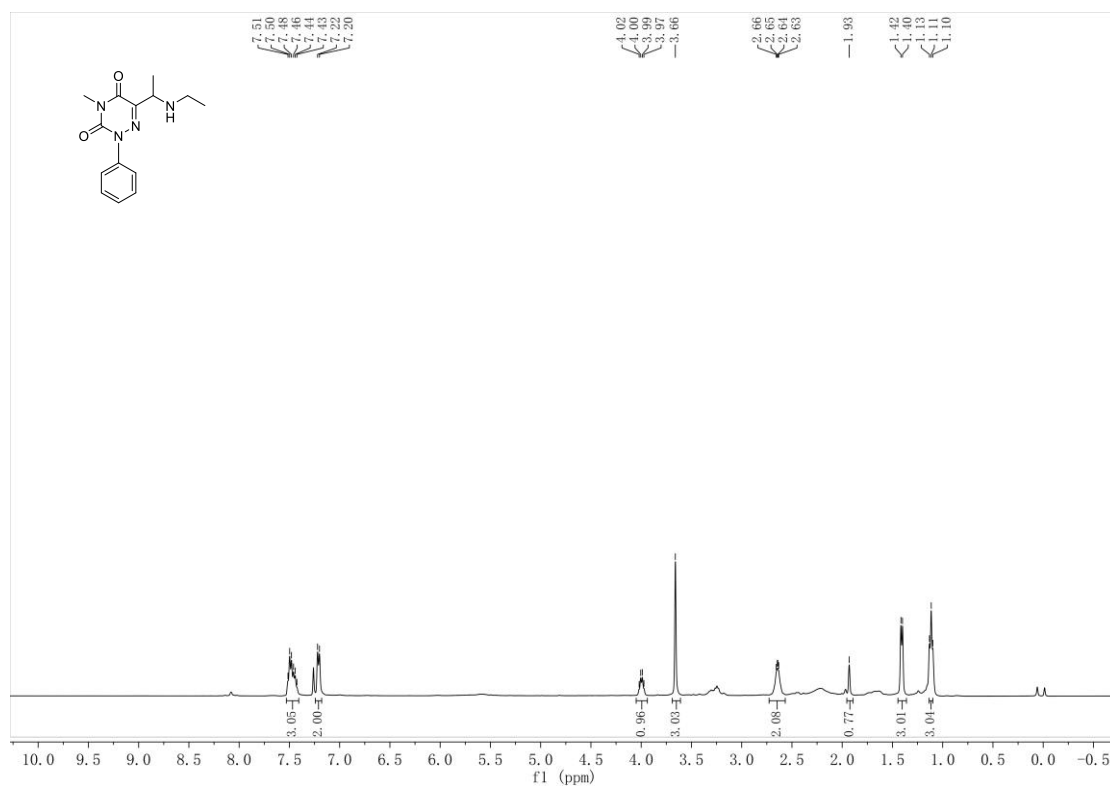

**4n-<sup>13</sup>C**

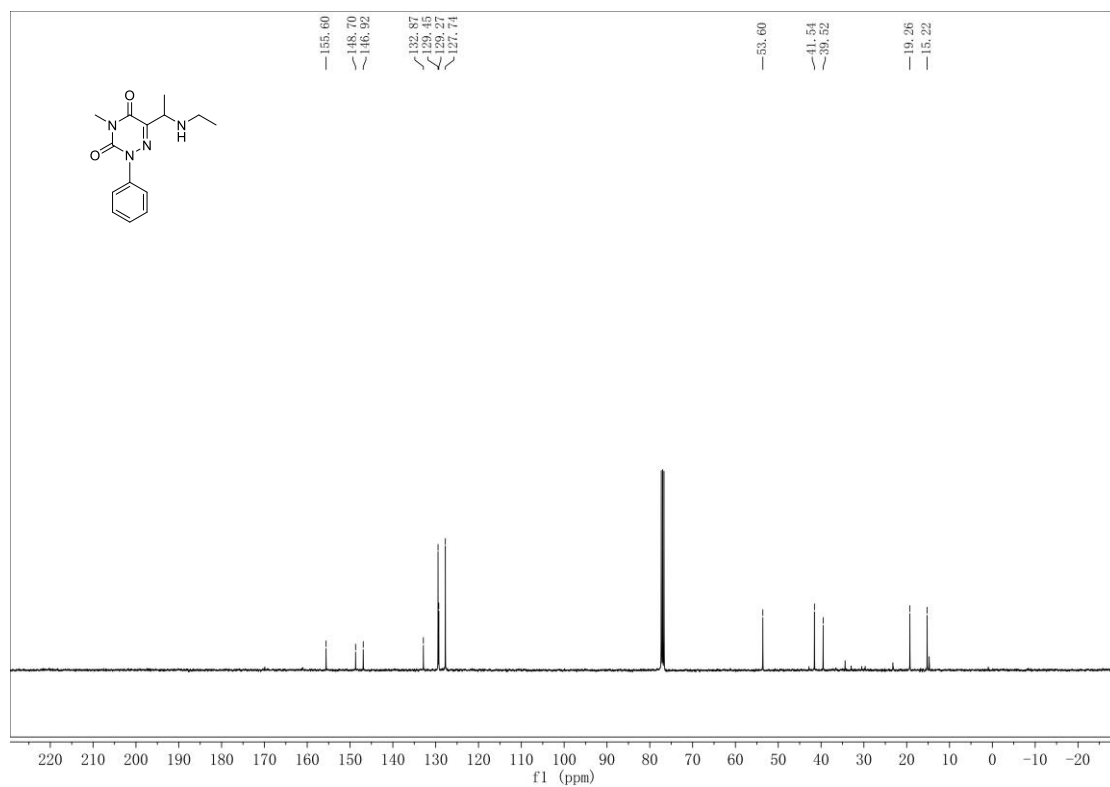

40-<sup>1</sup>H

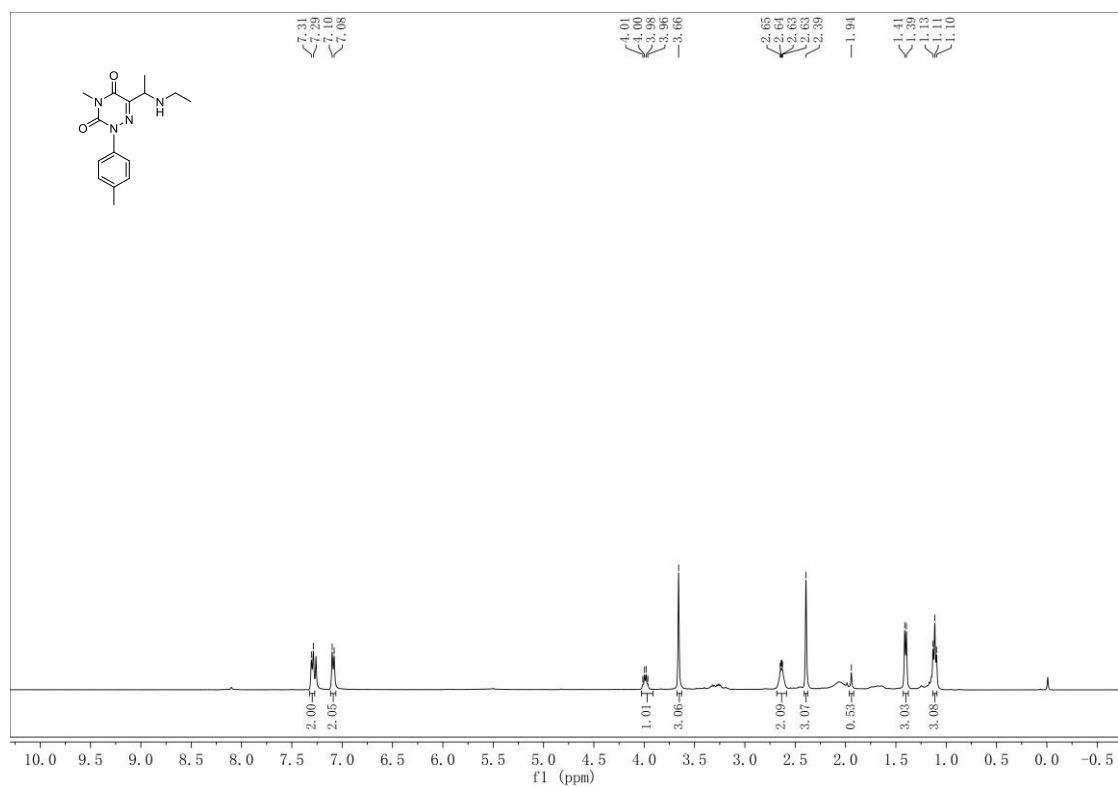

40-<sup>13</sup>C

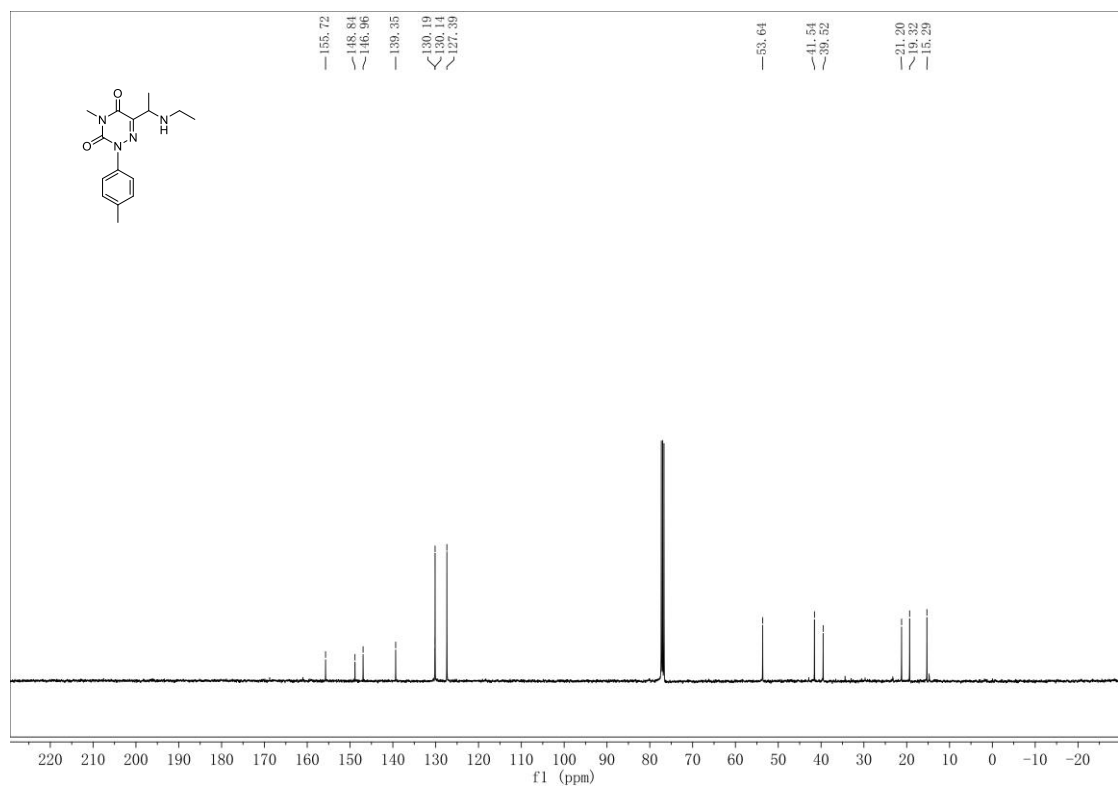

### 4p-<sup>1</sup>H

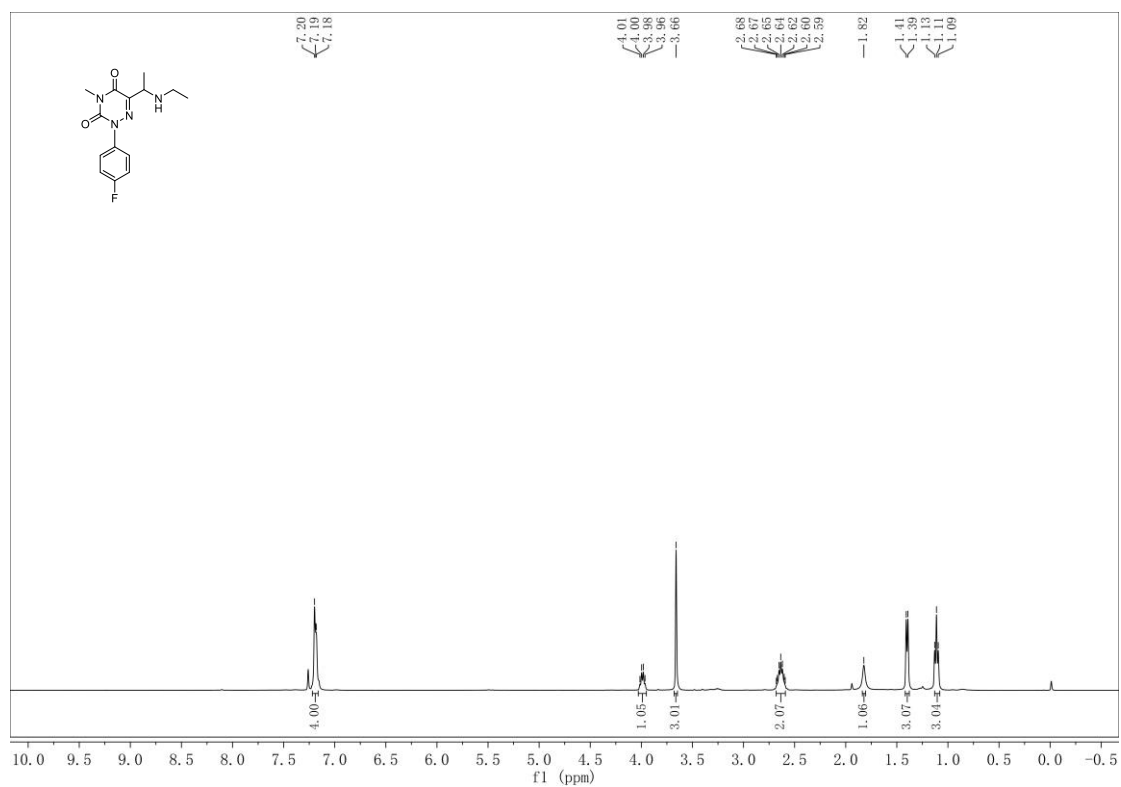

### 4p-<sup>13</sup>C

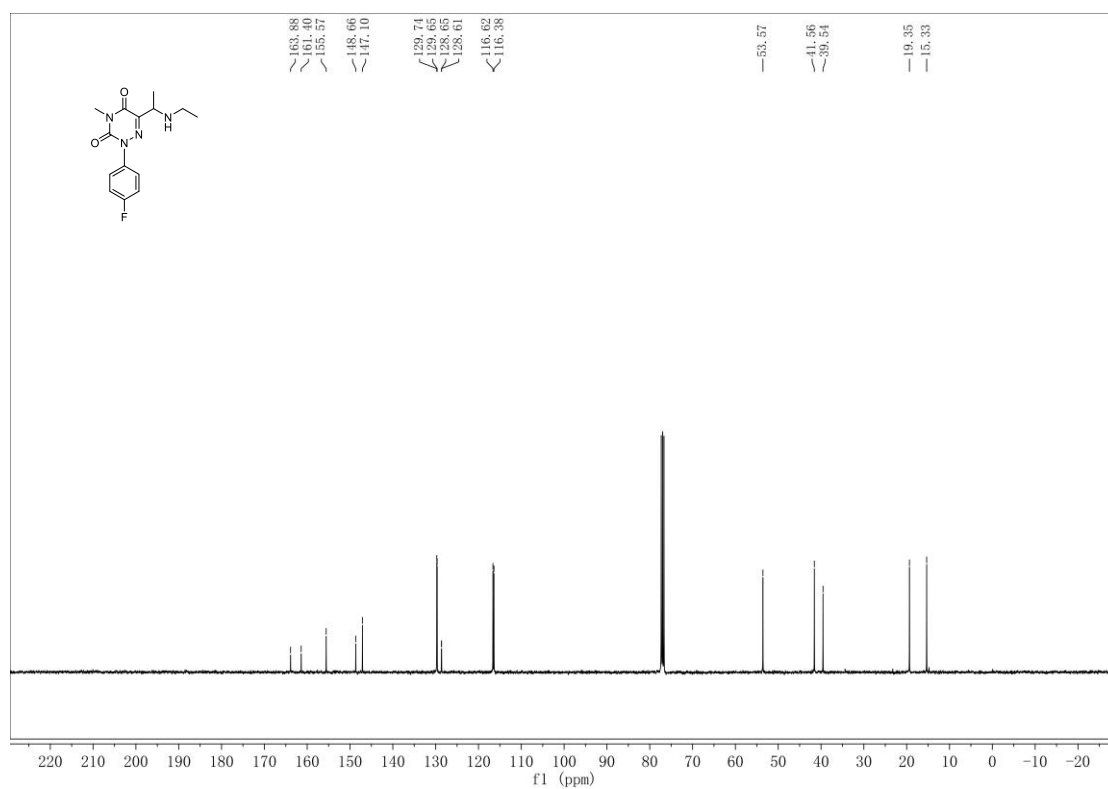

**4q-<sup>1</sup>H**

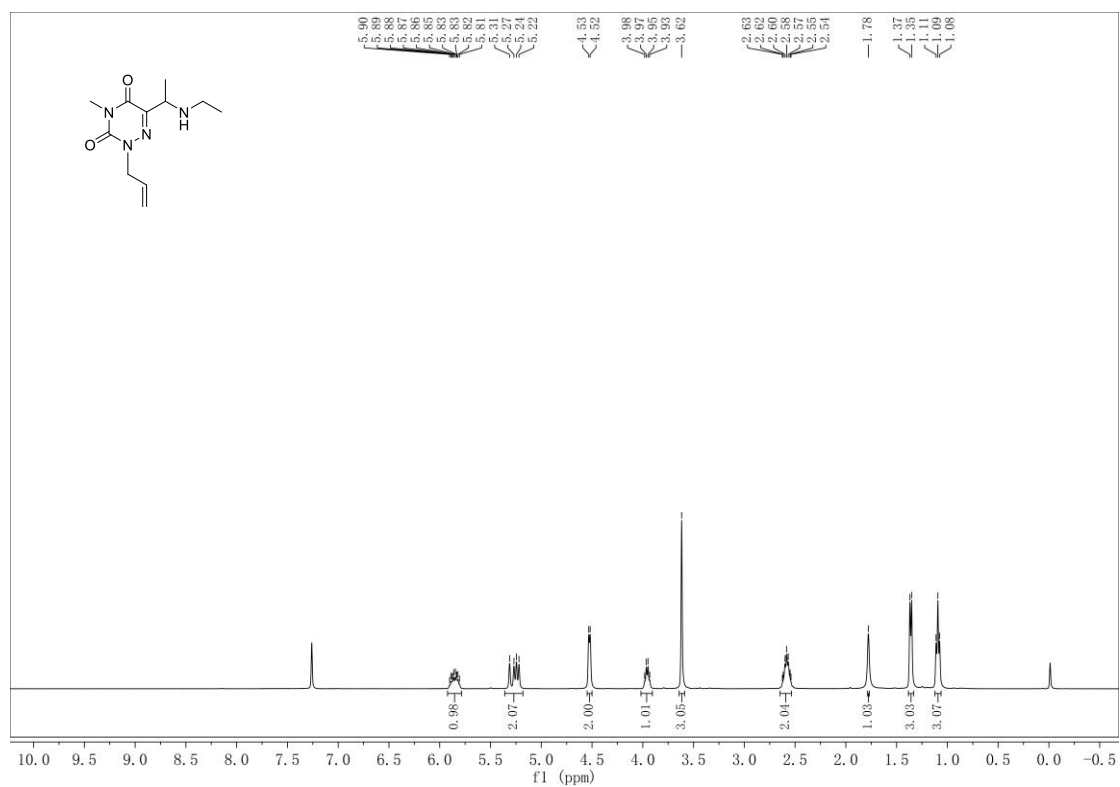

**4q-<sup>13</sup>C**

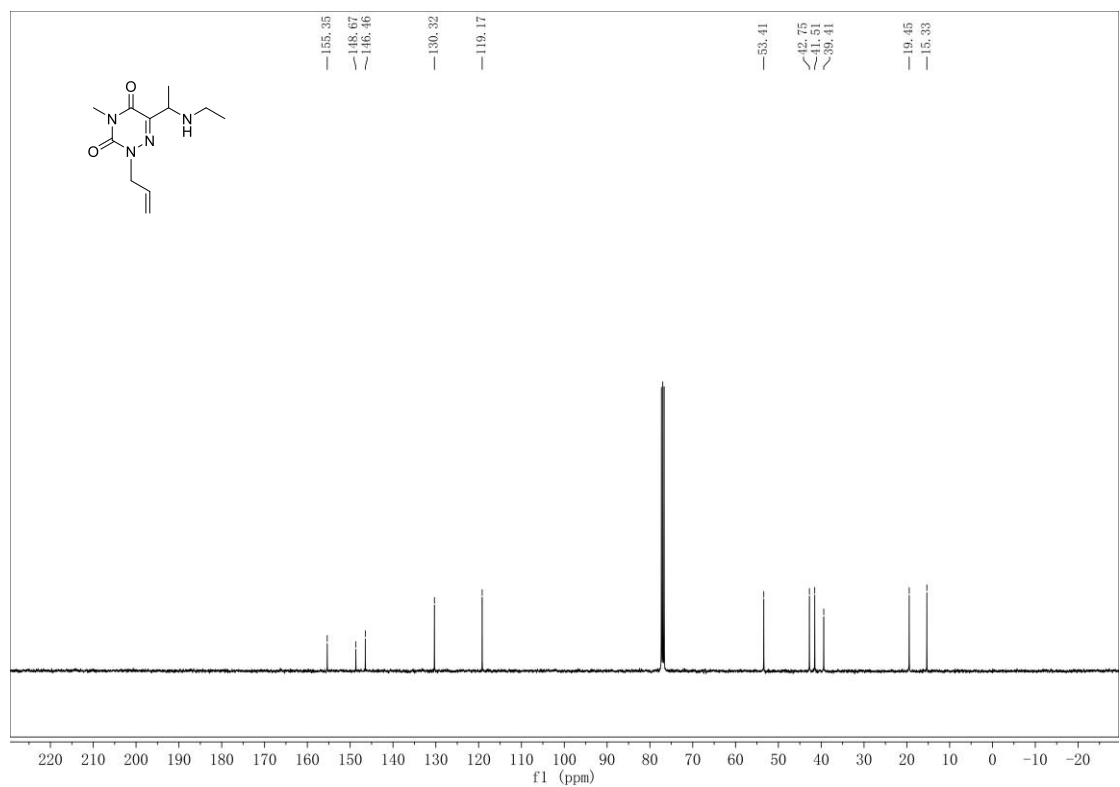

**4r-<sup>1</sup>H**

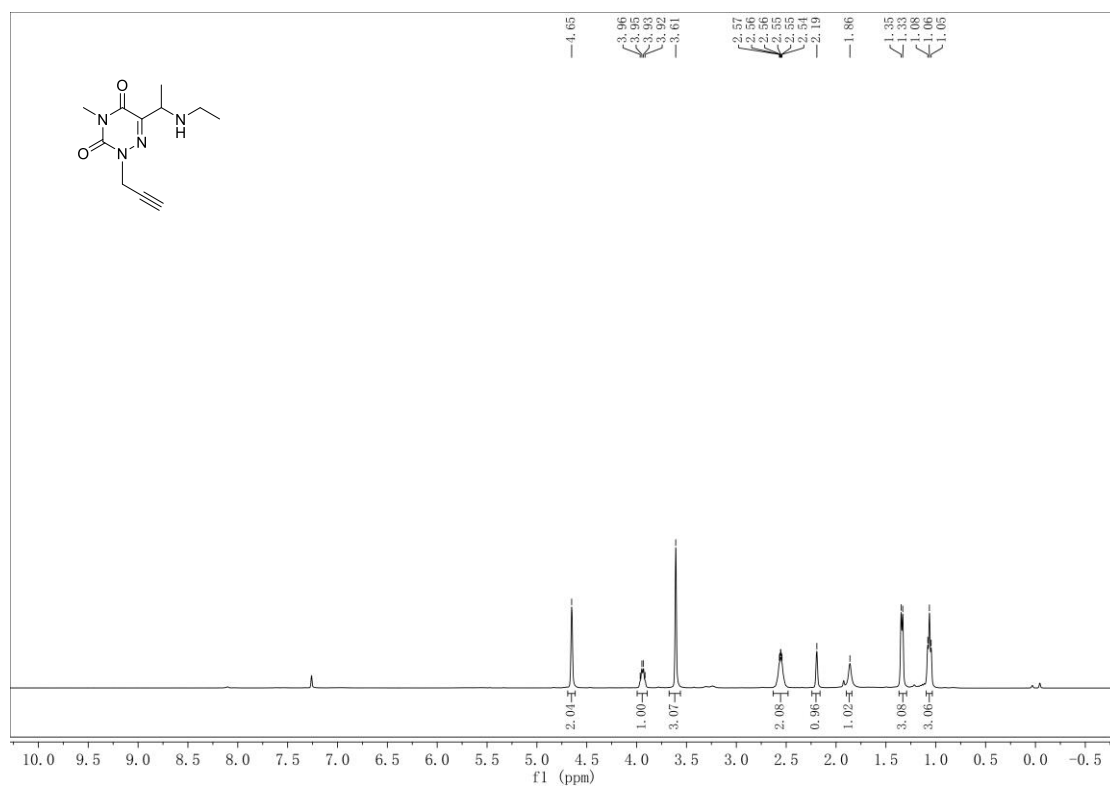

**4r-<sup>13</sup>C**

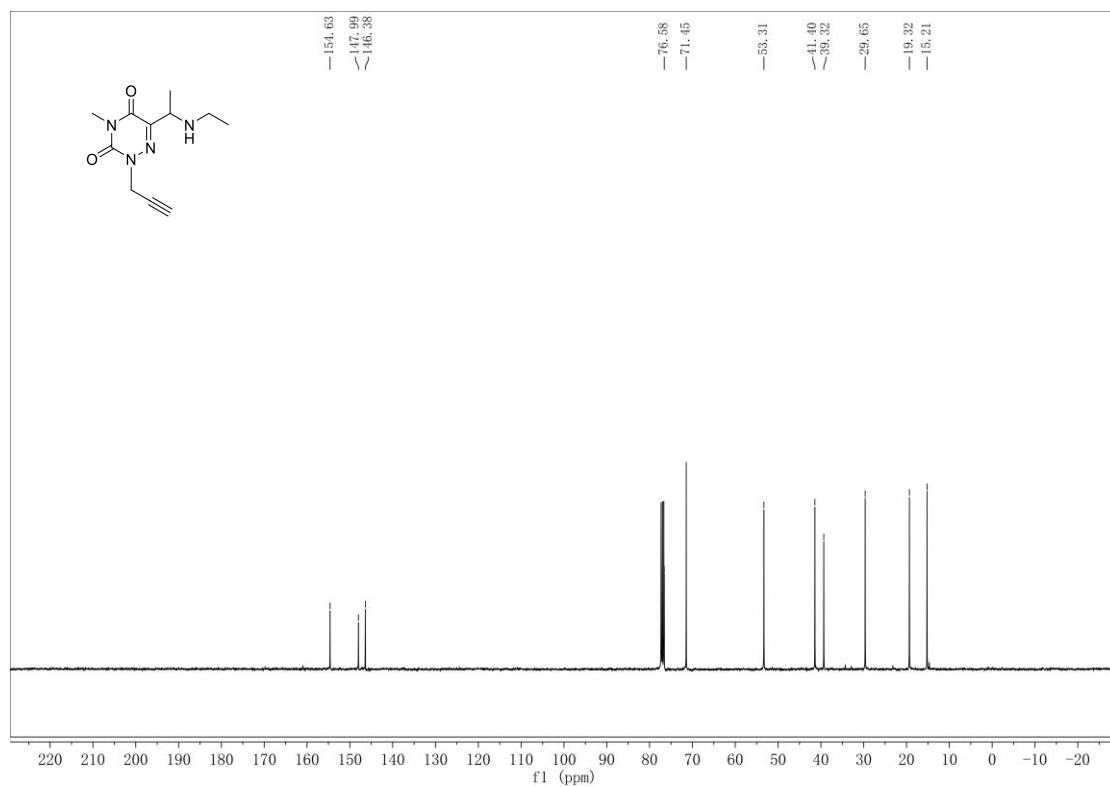

4s-<sup>1</sup>H

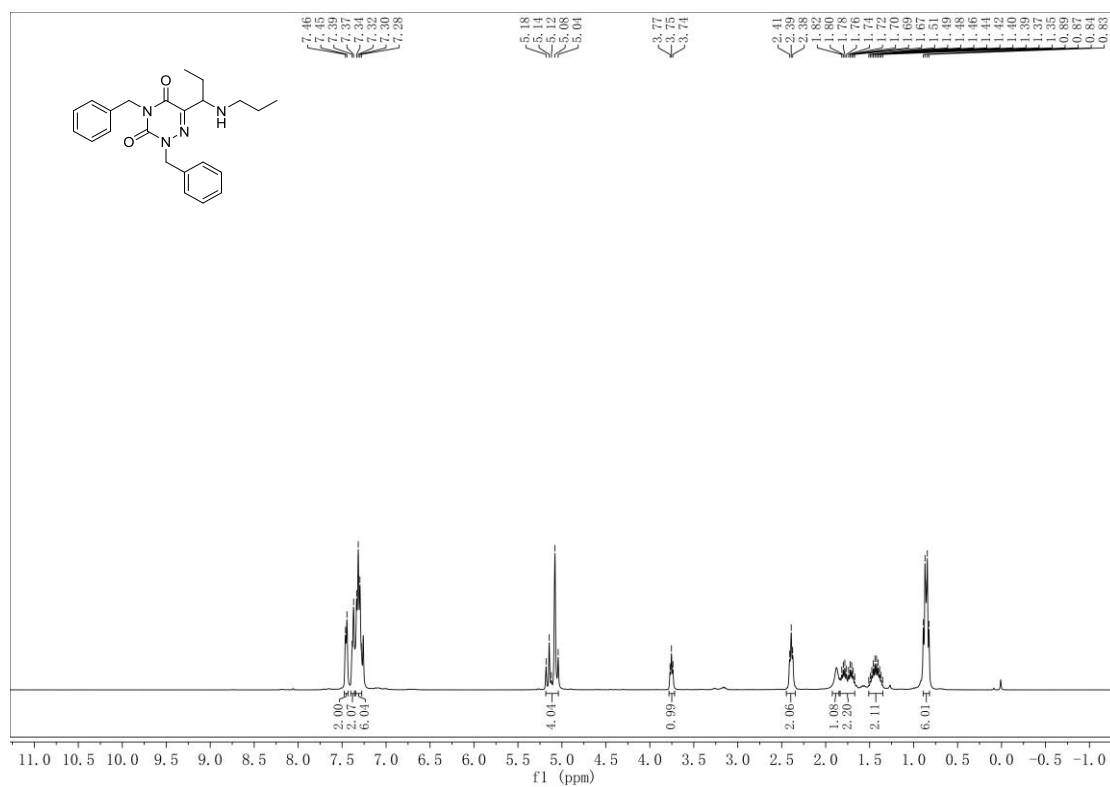

4s-<sup>13</sup>C

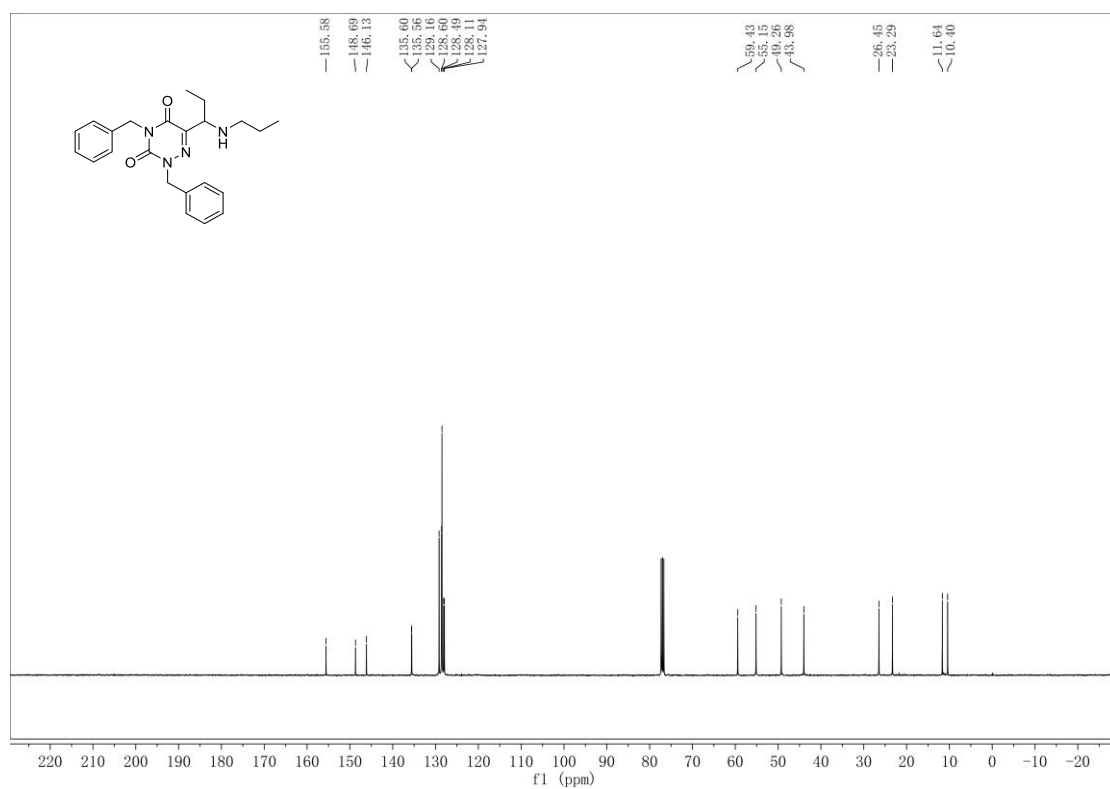

**4t-<sup>1</sup>H**

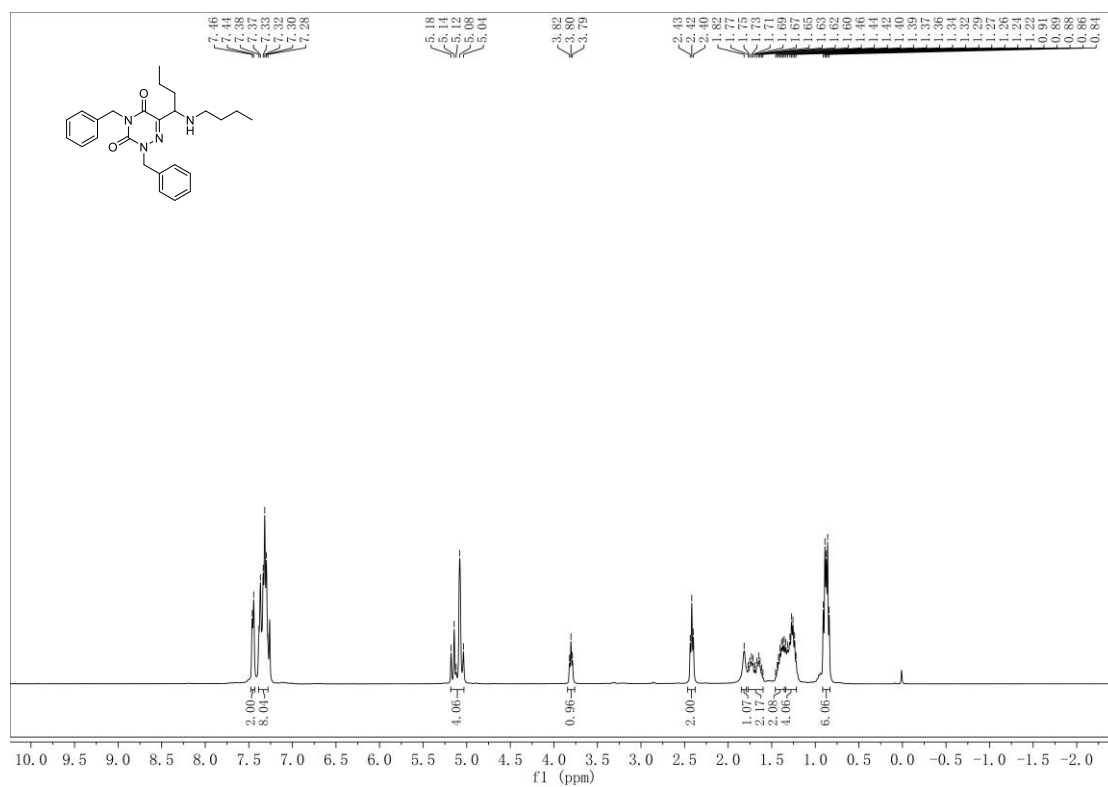

**4t-<sup>13</sup>C**

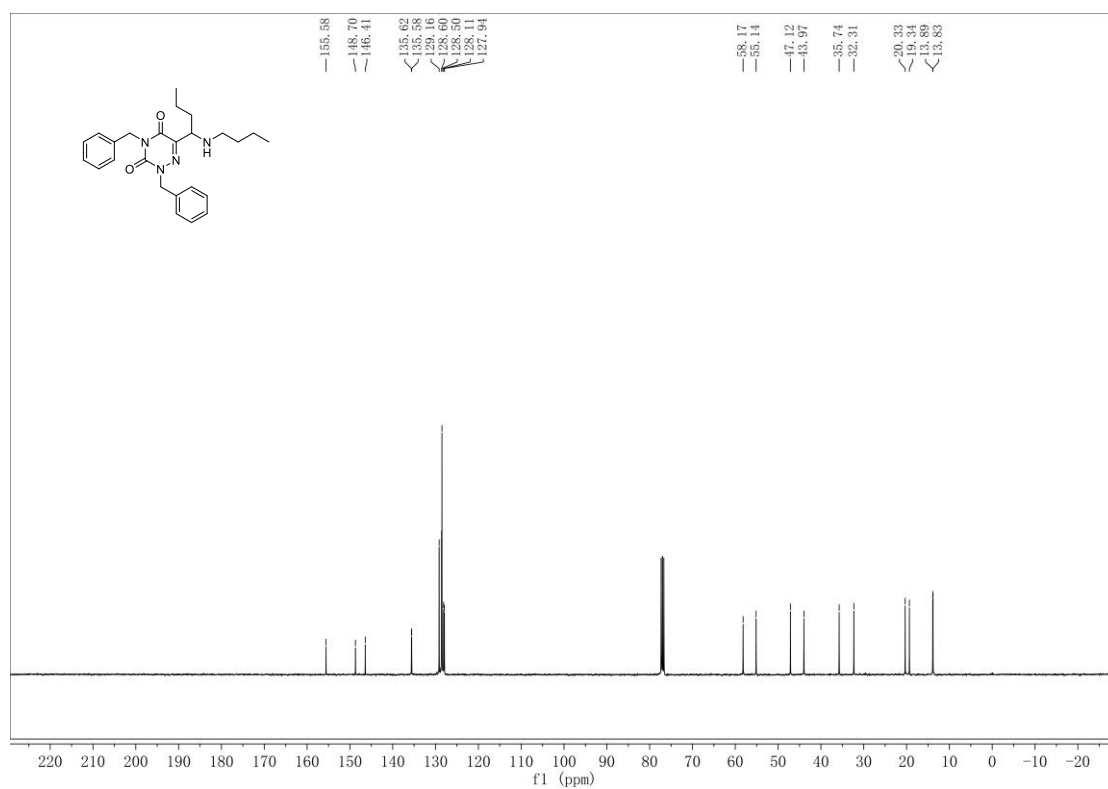



**4u-<sup>1</sup>H**

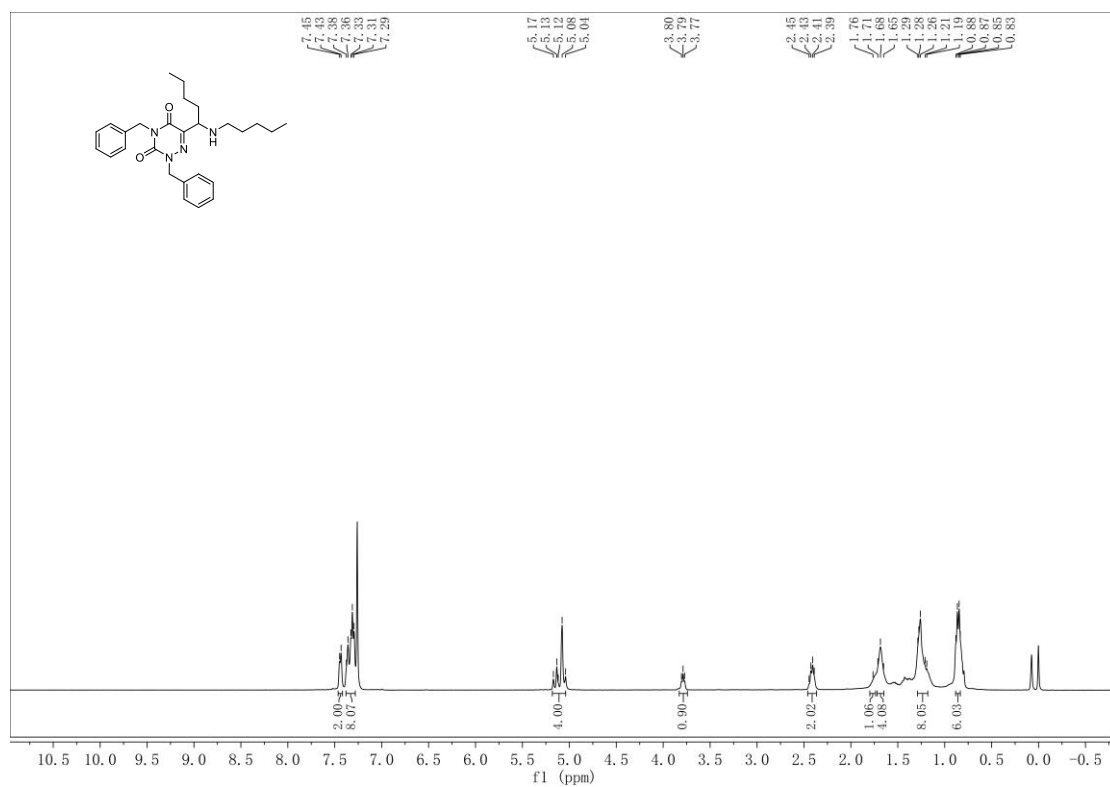

**4u-<sup>13</sup>C**

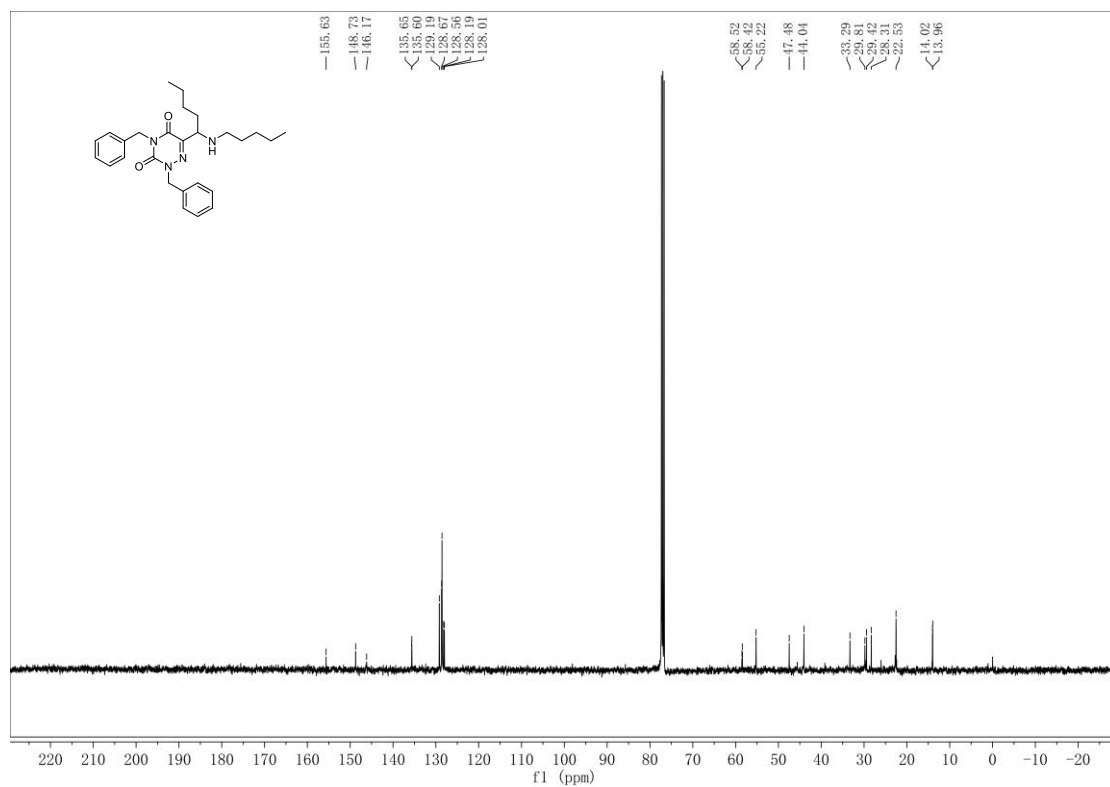

4v-<sup>1</sup>H

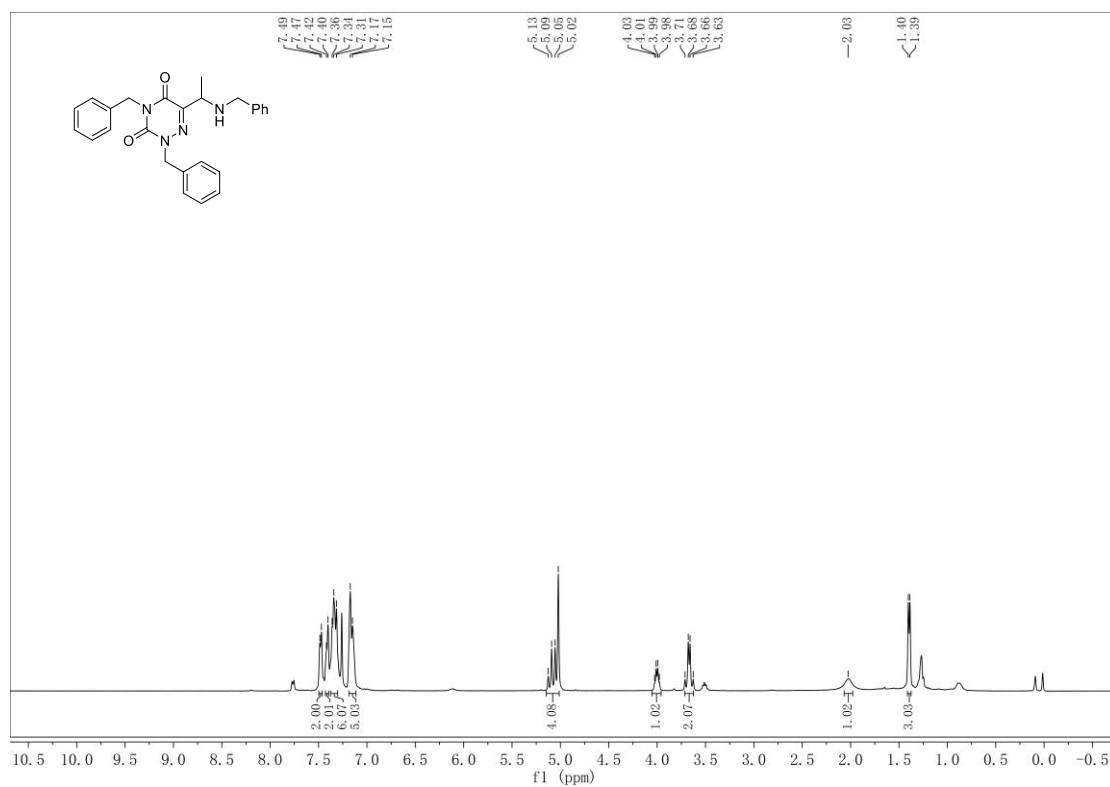

4v-<sup>13</sup>C

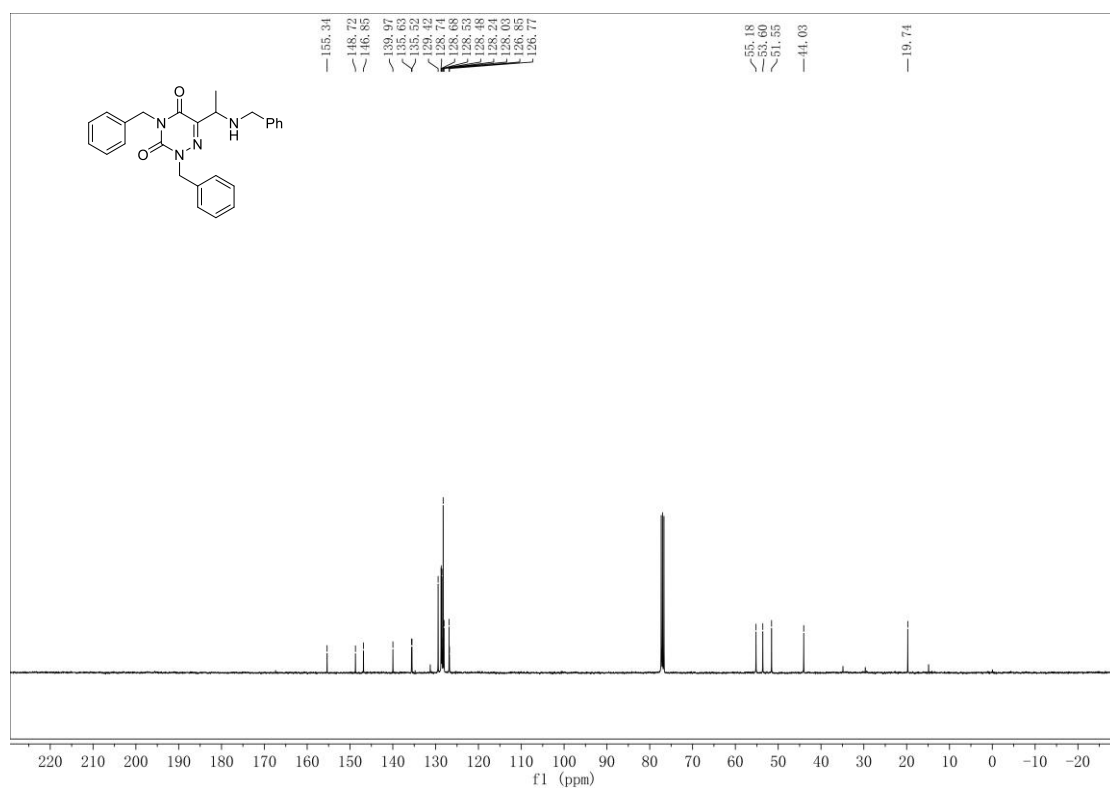

**4w-<sup>1</sup>H**

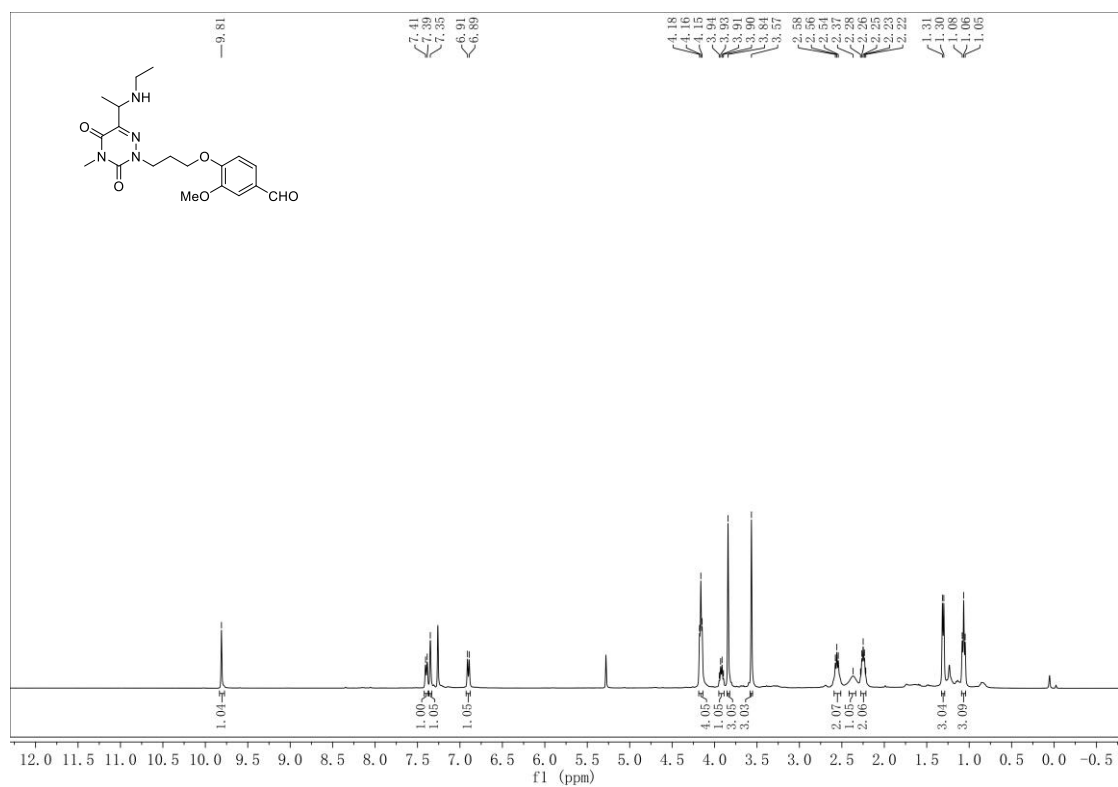

**4w-<sup>13</sup>C**

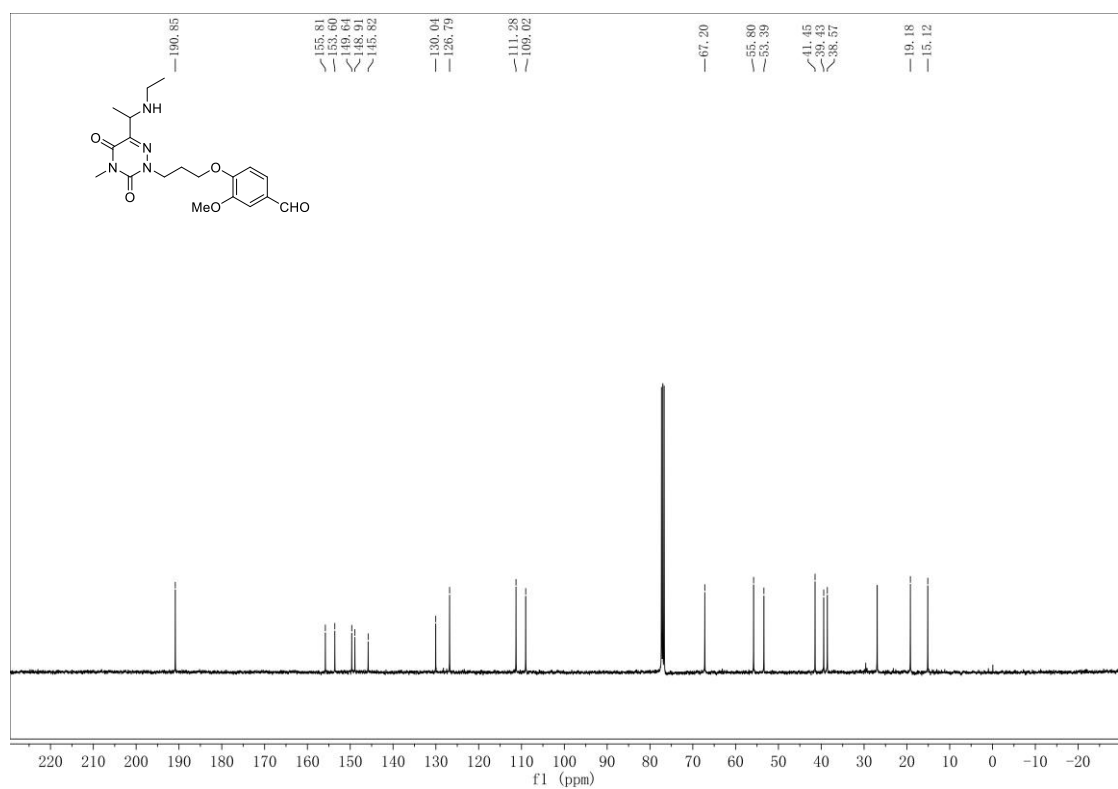

**4x-<sup>1</sup>H**

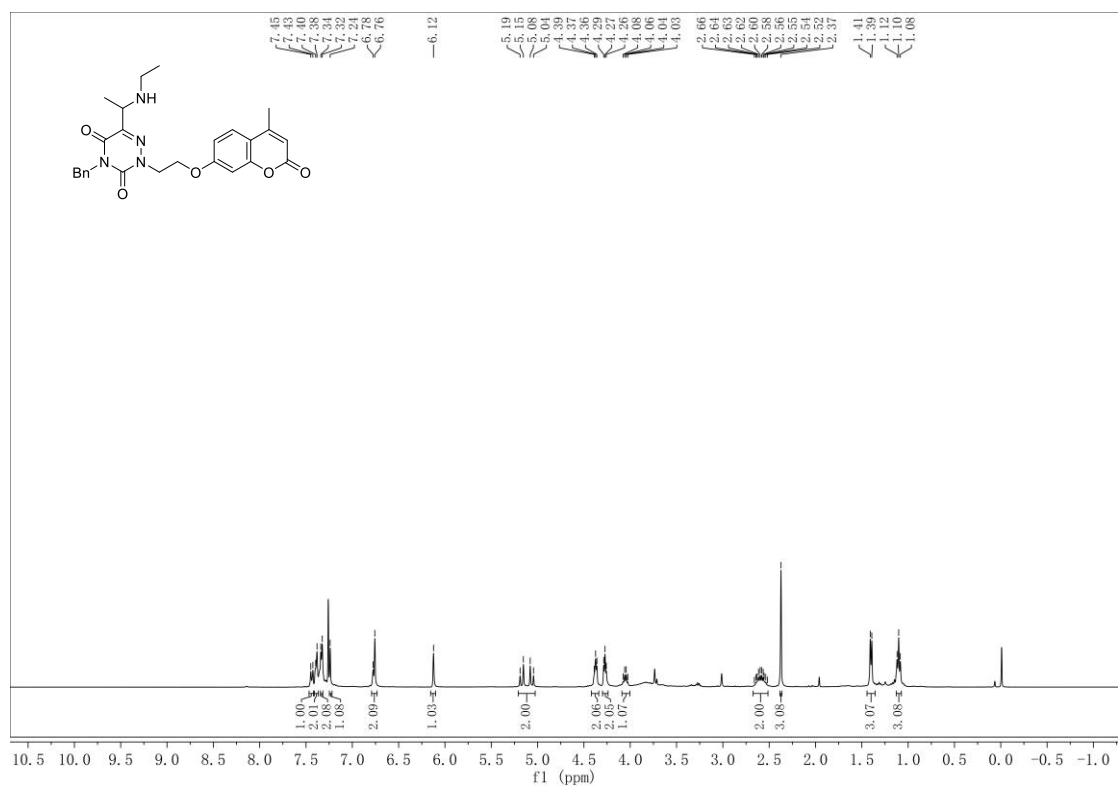

**4x-<sup>13</sup>C**

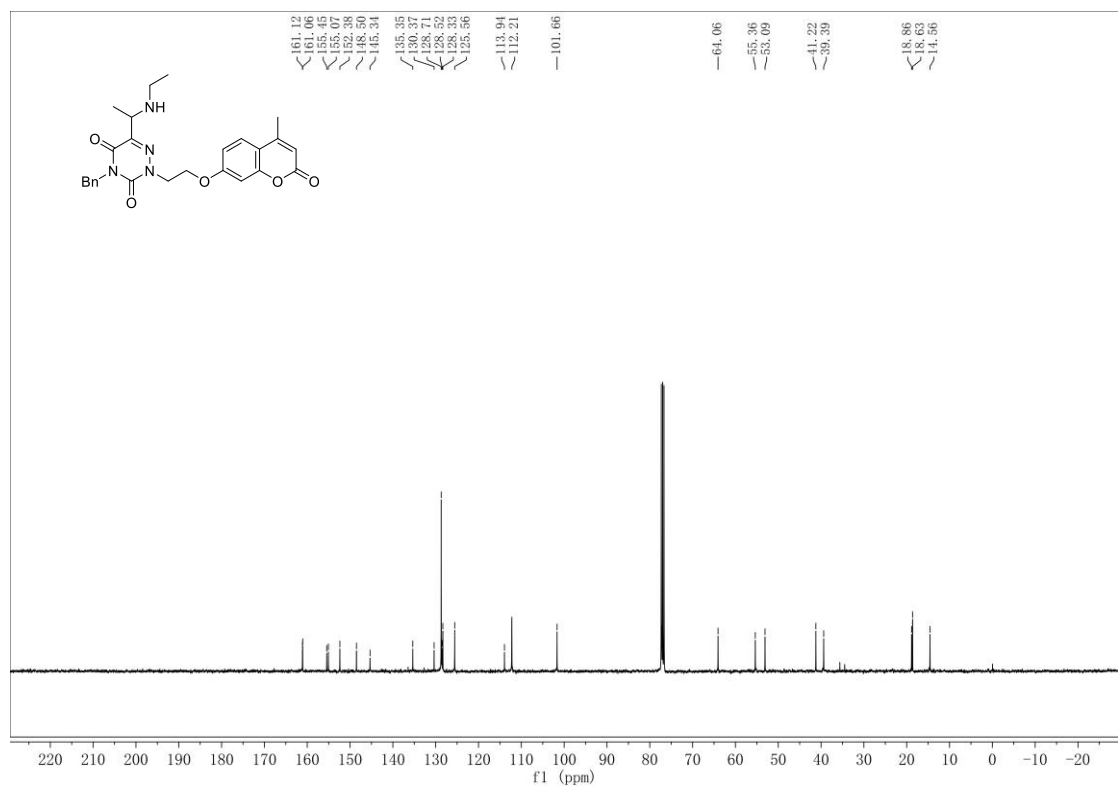

**4y-<sup>1</sup>H**

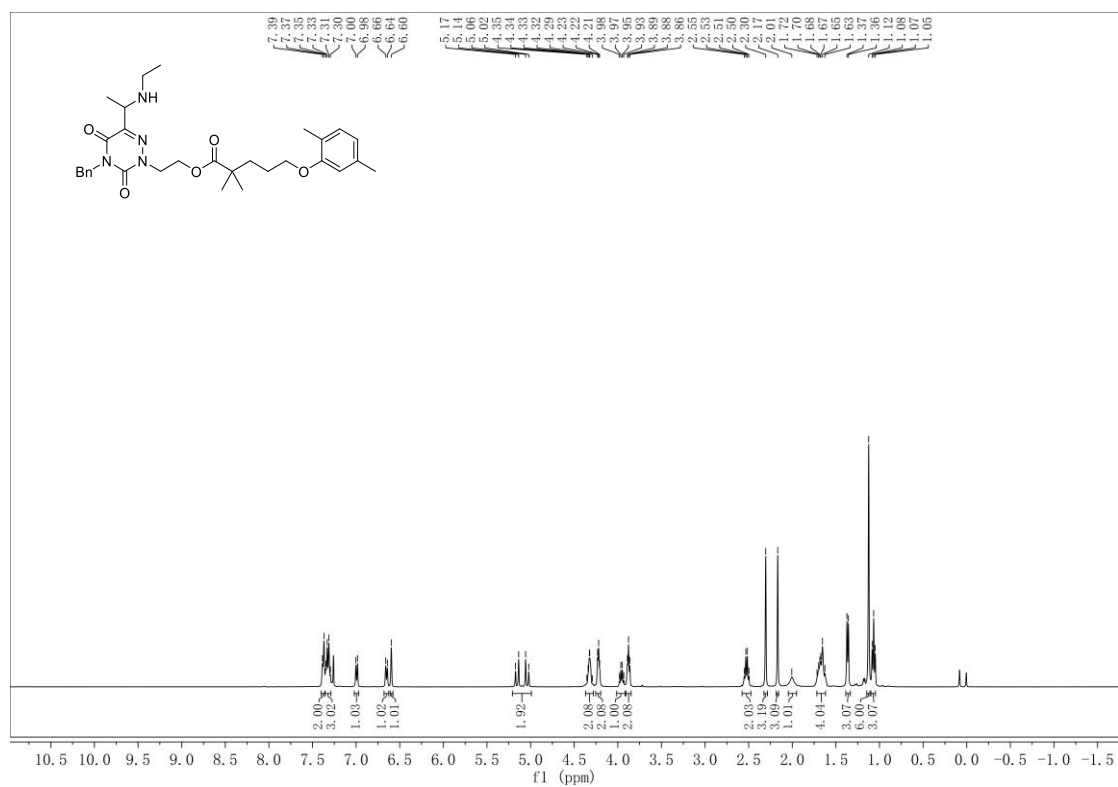

**4y-<sup>13</sup>C**

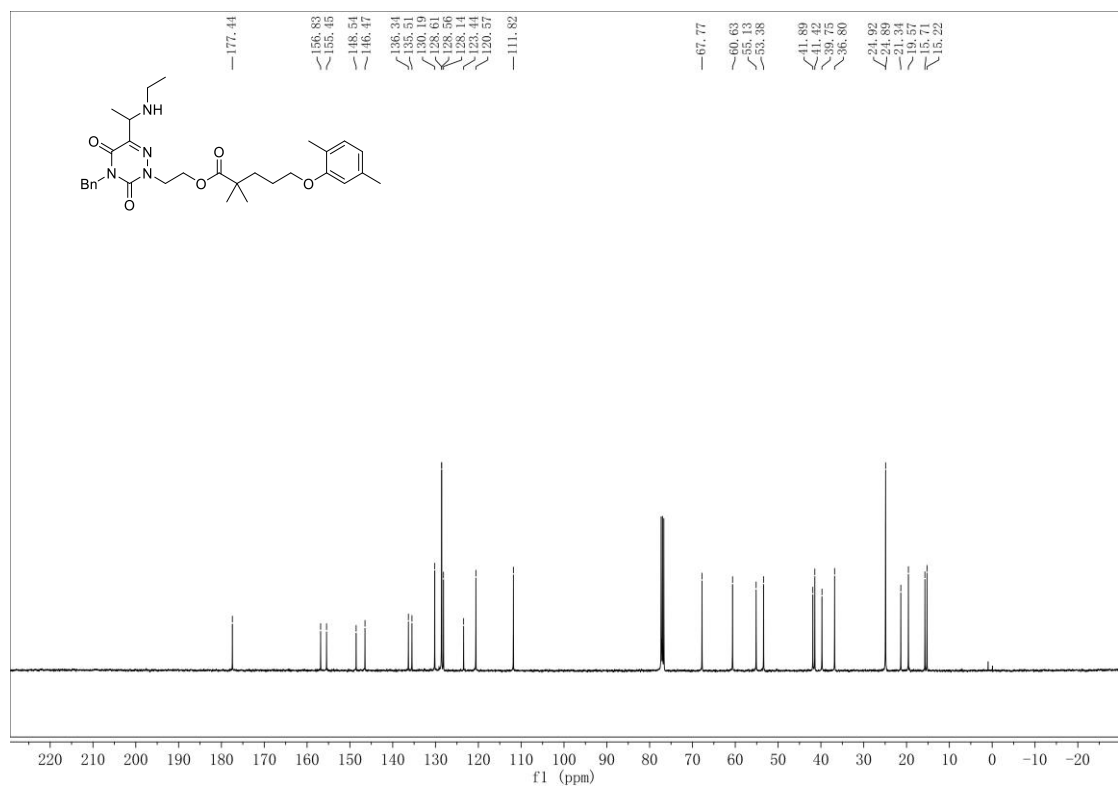

**4z-<sup>1</sup>H**

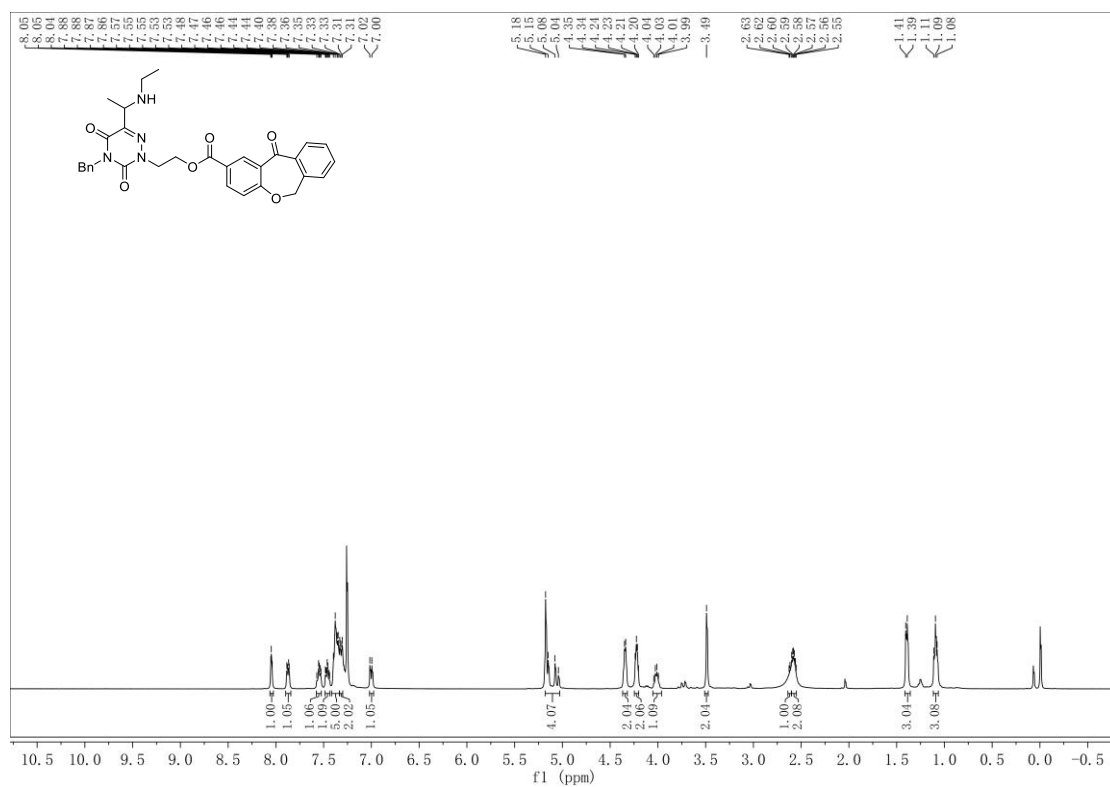

**4z-<sup>13</sup>C**

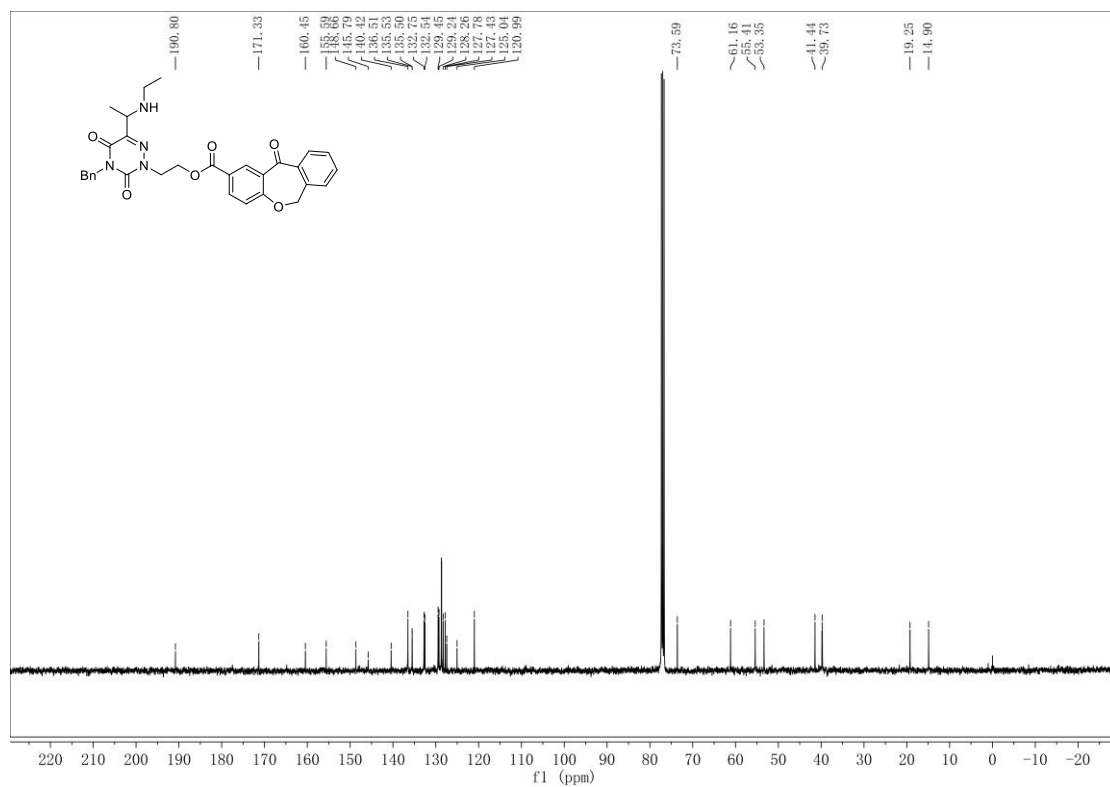

4aa-<sup>1</sup>H

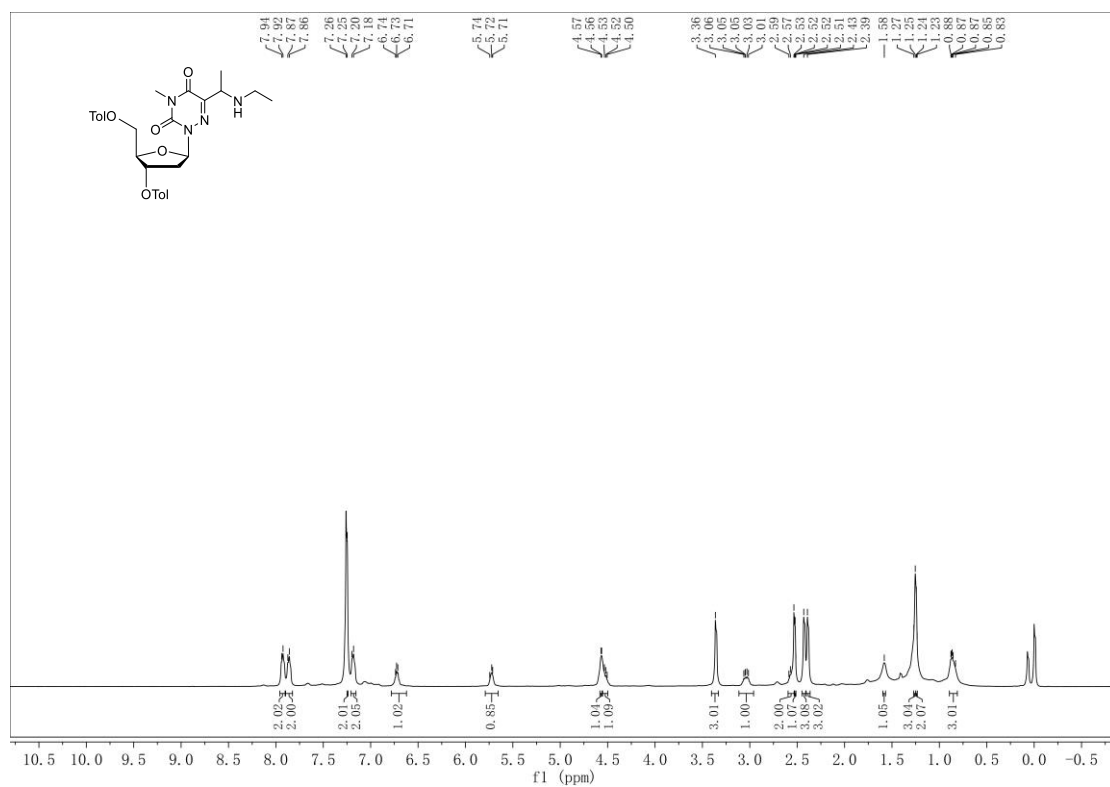

4aa-<sup>13</sup>C

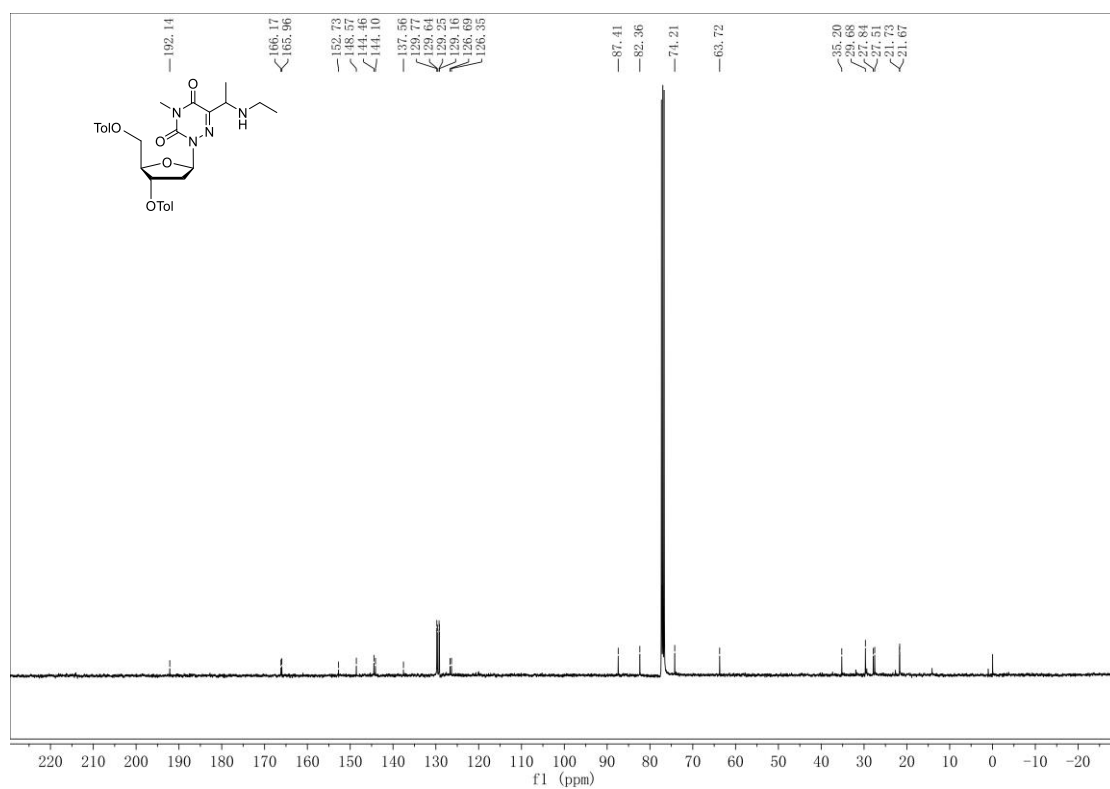

## XI. Computational details

Quantum chemistry calculations were conducted with the Gaussian 09 software package<sup>3</sup>. The structures were optimized by the density functional theory (DFT)<sup>4</sup> with B3LYP-D3 functional<sup>5,6</sup> with basis set def2-SVP<sup>7</sup> using IEFPCM<sup>8</sup> continuum solvent model (solvent = dichloroethane). Frequency analyses were performed at the same level of theory to verify the stationary points to be real minima or saddle points and to obtain the thermodynamic energy corrections at 298.15K. All transition states were confirmed by intrinsic reaction coordinate (IRC) calculations were performed to confirm the connection between two correct minima for a transition state. In order to get more accurate electronic energies, the single point energy were calculated at the M062x<sup>9</sup>-D3 /def2-TZVP level of theory using SMD<sup>10</sup> continuum solvent model (solvent = dichloroethane) .

**Table S3** Calculated energy data and imaginary frequencies for all structure.

|                                     | Energy (au)               | Thermal correction<br>to Enthalpy (au) | Thermal correction<br>to Gibbs Free<br>Energy (au) | Imaginary<br>frequency (cm <sup>-1</sup> ) |
|-------------------------------------|---------------------------|----------------------------------------|----------------------------------------------------|--------------------------------------------|
|                                     | M062x-D3<br>/def2TZVP/SMD | B3LYP-D3<br>/def2SVP/IEFPCM            | B3LYP-D3<br>/def2SVP/IEFPCM                        | B3LYP-D3 /<br>/def2SVP/IEFPCM              |
| <b>Substrate</b>                    | -971.556072               | 0.312958                               | 0.245328                                           | None                                       |
| <b>HNEt<sub>2</sub></b>             | -213.767052               | 0.156382                               | 0.118596                                           | None                                       |
| <b>HNEt<sub>2</sub>-CR</b>          | -213.557019               | 0.155963                               | 0.116847                                           | None                                       |
| <b>H<sub>2</sub>NEt<sub>2</sub></b> | -214.229553               | 0.172429                               | 0.133913                                           | None                                       |
| <b>NEt<sub>2</sub>-C-Radical</b>    | -213.115582               | 0.142572                               | 0.103719                                           | None                                       |
| <b>NEt<sub>2</sub>-N-Radical</b>    | -213.110557               | 0.141358                               | 0.101454                                           | None                                       |
| <b><sup>3</sup>O<sub>2</sub></b>    | -150.327196               | 0.007176                               | -0.016086                                          | None                                       |
| <b><sup>1</sup>O<sub>2</sub></b>    | -150.26844                | 0.00714                                | -0.015087                                          | None                                       |
| <b>HO<sub>2</sub></b>               | -150.914738               | 0.017938                               | -0.008023                                          | None                                       |
| <b>TS-1</b>                         | -1184.681484              | 0.457714                               | 0.371104                                           | -178.06                                    |
| <b>INT-1</b>                        | -1184.699442              | 0.459995                               | 0.375301                                           | None                                       |
| <b>4a</b>                           | -1184.138656              | 0.44926                                | 0.365307                                           | None                                       |
| <b>H<sub>2</sub>O<sub>2</sub></b>   | -151.557405               | 0.029554                               | 0.003583                                           | None                                       |
| <b>TS-2</b>                         | -1184.649872              | 0.454957                               | 0.371605                                           | -1602.27                                   |
| <b>INT-1-pAcid</b>                  | -1527.144544              | 0.540332                               | 0.438578                                           | None                                       |
| <b>TS-2-pAcid</b>                   | -1527.130378              | 0.537035                               | 0.440843                                           | -1368.06                                   |
| <b>INT-2-pAcid</b>                  | -1527.146218              | 0.541073                               | 0.442392                                           | None                                       |



|                         |              |          |          |         |
|-------------------------|--------------|----------|----------|---------|
| <b>TS-3-pAcid</b>       | -1527.118126 | 0.53901  | 0.438666 | -238.20 |
| <b>TS-3</b>             | -1184.681925 | 0.458861 | 0.374447 | -369.96 |
| <b>NH<sub>2</sub>Et</b> | -135.15913   | 0.097525 | 0.066802 | None    |
| <b>INT-3</b>            | -1049.53404  | 0.358385 | 0.283927 | None    |

## Structures of Transition states

**TS-1**

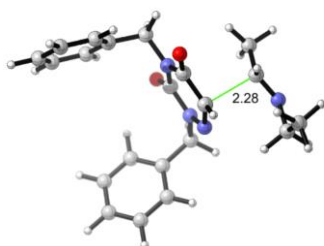

**TS-2**

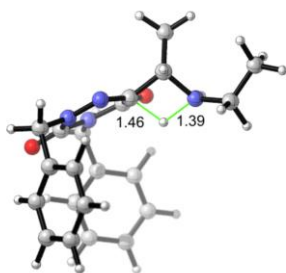

**TS-2-pAcid**

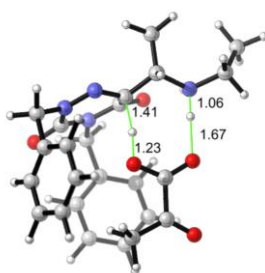

**TS-3-pAcid**

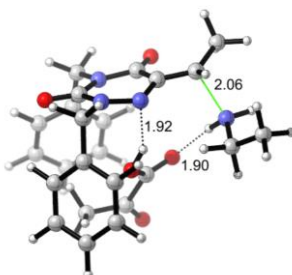

**TS-3**

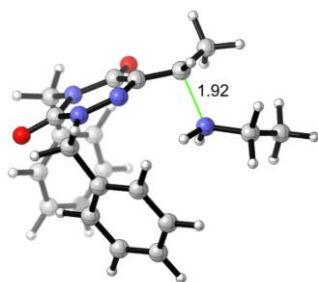

## Coordinations

### Substrate

Charge = 0 Multiplicity = 1

|   |             |             |             |
|---|-------------|-------------|-------------|
| C | 0.14270500  | -2.73659200 | -1.15732100 |
| C | 0.01393000  | -1.12079700 | 1.08142900  |
| C | -1.18945300 | -2.31375200 | -0.70640200 |
| N | -1.15944100 | -1.51881200 | 0.44526100  |
| N | 1.18784500  | -1.62555200 | 0.52033100  |
| N | 1.23976900  | -2.39117400 | -0.57409200 |
| O | 0.02279000  | -0.39062100 | 2.05642000  |
| O | -2.22868000 | -2.61037500 | -1.27100600 |
| C | 2.48522100  | -1.18101500 | 1.06332200  |
| H | 2.34683600  | -1.01827900 | 2.13837400  |
| H | 3.17940100  | -2.01721700 | 0.91422100  |
| C | -2.43379100 | -0.99210900 | 0.97562600  |
| H | -2.33405200 | -0.94246200 | 2.06577200  |
| H | -3.20274500 | -1.72846500 | 0.71544700  |
| C | -2.77210700 | 0.36758100  | 0.39920900  |
| C | -2.39039600 | 1.54070900  | 1.06833800  |
| C | -3.44052900 | 0.46736300  | -0.83180900 |
| C | -2.67966000 | 2.79403500  | 0.51956100  |
| H | -1.85293200 | 1.46251100  | 2.01568400  |
| C | -3.72807400 | 1.72060400  | -1.38061900 |
| H | -3.72341200 | -0.44652900 | -1.35922600 |
| C | -3.34924600 | 2.88670900  | -0.70559000 |
| H | -2.38005900 | 3.70164900  | 1.05005400  |
| H | -4.25114600 | 1.78755500  | -2.33814400 |
| H | -3.57571300 | 3.86649400  | -1.13414300 |
| C | 2.98208500  | 0.07454000  | 0.37976700  |
| C | 3.84507900  | -0.01338300 | -0.72243900 |
| C | 2.54339600  | 1.33847400  | 0.80711200  |
| C | 4.27020000  | 1.14286500  | -1.38462600 |
| H | 4.18556700  | -0.99454400 | -1.06401400 |
| C | 2.96650100  | 2.49401900  | 0.14424500  |
| H | 1.85946600  | 1.40637700  | 1.65597300  |
| C | 3.83138900  | 2.39890800  | -0.95224400 |

|   |            |             |             |
|---|------------|-------------|-------------|
| H | 4.94625300 | 1.06257600  | -2.23973500 |
| H | 2.62072600 | 3.47323100  | 0.48538500  |
| H | 4.16385500 | 3.30319000  | -1.46845200 |
| H | 0.20436800 | -3.36832200 | -2.04635900 |

### HNEt<sub>2</sub>

Charge = 0 Multiplicity = 1

|   |             |             |             |
|---|-------------|-------------|-------------|
| N | -0.07487000 | -0.67659600 | 0.20331600  |
| H | -0.10553000 | -0.66698800 | 1.22414800  |
| C | 1.31181800  | -0.61543700 | -0.24474200 |
| C | 2.11492200  | 0.62396500  | 0.17536900  |
| H | 1.31583800  | -0.69647100 | -1.34728600 |
| H | 1.82616700  | -1.51902000 | 0.12763100  |
| H | 3.15911800  | 0.55018000  | -0.17078800 |
| H | 1.69003200  | 1.55005200  | -0.24352100 |
| H | 2.12963900  | 0.72597000  | 1.27412900  |
| C | -0.96116600 | 0.35632900  | -0.31874300 |
| C | -2.40120300 | 0.11965400  | 0.12641600  |
| H | -0.90475900 | 0.32264100  | -1.42236100 |
| H | -0.66071600 | 1.38895700  | -0.03328300 |
| H | -3.07808900 | 0.87807000  | -0.29802400 |
| H | -2.74631600 | -0.87788100 | -0.18903600 |
| H | -2.48751900 | 0.17359200  | 1.22537900  |

### HNEt<sub>2</sub>-CR

Charge = 1 Multiplicity = 2

|   |             |             |             |
|---|-------------|-------------|-------------|
| N | -0.00411400 | -0.39358000 | 0.44142400  |
| H | -0.16490600 | -0.22090500 | 1.44146300  |
| C | 1.34803200  | -0.61547600 | 0.01165500  |
| C | 2.10083700  | 0.73301200  | -0.10498400 |
| H | 1.32470900  | -1.13058400 | -0.95902100 |
| H | 1.84177000  | -1.25224400 | 0.76286300  |
| H | 3.12670000  | 0.51219300  | -0.43283400 |
| H | 1.61664300  | 1.38214600  | -0.84826200 |
| H | 2.13913200  | 1.24969200  | 0.86433300  |
| C | -1.13731500 | -0.34788000 | -0.43731500 |
| C | -2.28912100 | 0.48902000  | 0.09987600  |
| H | -1.45012500 | -1.40848400 | -0.57890300 |
| H | -0.78090000 | -0.01862500 | -1.42888100 |
| H | -3.13062000 | 0.43062600  | -0.60408400 |
| H | -2.63557300 | 0.11591600  | 1.07584200  |
| H | -1.99263100 | 1.54327300  | 0.20212700  |

### H<sub>2</sub>NEt<sub>2</sub>

Charge = 1 Multiplicity = 1

|   |             |             |             |
|---|-------------|-------------|-------------|
| N | 0.04863800  | 0.64911200  | 0.22513700  |
| H | 0.41612500  | 1.58963900  | 0.02777700  |
| C | -1.38579200 | 0.59013800  | -0.24831200 |
| C | -2.09578700 | -0.68241700 | 0.17699300  |
| H | -1.35460800 | 0.70131900  | -1.34141600 |
| H | -1.87549900 | 1.47914800  | 0.17235100  |
| H | -3.14862000 | -0.61141800 | -0.13212300 |
| H | -1.67123500 | -1.57969200 | -0.29507600 |
| H | -2.07567600 | -0.80982500 | 1.27074400  |
| C | 0.98794600  | -0.37089800 | -0.36690500 |
| C | 2.40469100  | -0.17718500 | 0.14321700  |
| H | 0.92127200  | -0.25577600 | -1.45768100 |
| H | 0.59405600  | -1.35929900 | -0.09921500 |
| H | 3.05043000  | -0.94980400 | -0.29810000 |
| H | 2.81063200  | 0.80534100  | -0.14321900 |
| H | 2.45722700  | -0.27920100 | 1.23847800  |
| H | 0.06908300  | 0.56795800  | 1.25155900  |

#### NEt<sub>2</sub>-C-Radical

Charge = 0 Multiplicity = 2

|   |             |             |             |
|---|-------------|-------------|-------------|
| N | 0.07190700  | -0.61692800 | -0.24108000 |
| C | -1.31836700 | -0.59997500 | 0.18764300  |
| C | -2.07389100 | 0.69305800  | -0.13819100 |
| H | -1.33645800 | -0.77607200 | 1.27754900  |
| H | -1.83143800 | -1.46075100 | -0.27403100 |
| H | -3.11240900 | 0.64856400  | 0.22869200  |
| H | -1.57552600 | 1.55766100  | 0.32838000  |
| H | -2.10383800 | 0.86575500  | -1.22713600 |
| C | 1.01004600  | 0.17675000  | 0.41847500  |
| C | 2.39535300  | 0.24364000  | -0.13718400 |
| H | 0.86651500  | 0.23680200  | 1.50453600  |
| H | 3.00244500  | 0.98308100  | 0.40808400  |
| H | 2.93689400  | -0.72751600 | -0.08522100 |
| H | 2.39235100  | 0.53923800  | -1.20350800 |
| H | 0.17927400  | -0.62910500 | -1.25424900 |

#### NEt<sub>2</sub>-N-Radical

Charge = 0 Multiplicity = 2

|   |            |             |             |
|---|------------|-------------|-------------|
| N | 0.00000600 | 0.30498000  | 0.00008400  |
| C | 1.20350800 | -0.48025400 | 0.01192400  |
| C | 2.45999500 | 0.38508300  | -0.00551200 |
| H | 1.20558900 | -1.18170700 | -0.85240600 |
| H | 1.20568500 | -1.14436000 | 0.90541700  |

|   |             |             |             |
|---|-------------|-------------|-------------|
| H | 3.36913100  | -0.23674900 | 0.00801100  |
| H | 2.48477900  | 1.01448500  | -0.90938100 |
| H | 2.48341000  | 1.05194800  | 0.87108000  |
| C | -1.20351200 | -0.48028000 | -0.01192700 |
| C | -2.46000600 | 0.38509000  | 0.00546300  |
| H | -1.20563800 | -1.18170800 | 0.85240900  |
| H | -1.20562100 | -1.14430000 | -0.90546800 |
| H | -3.36915300 | -0.23672200 | -0.00837200 |
| H | -2.48492200 | 1.01430600  | 0.90945300  |
| H | -2.48321400 | 1.05211700  | -0.87101000 |

**<sup>3</sup>O<sub>2</sub>**

Charge = 0 Multiplicity = 3

|   |            |            |             |
|---|------------|------------|-------------|
| O | 0.00000000 | 0.00000000 | 0.59981400  |
| O | 0.00000000 | 0.00000000 | -0.59981400 |

**<sup>1</sup>O<sub>2</sub>**

Charge = 0 Multiplicity = 1

|   |            |            |             |
|---|------------|------------|-------------|
| O | 0.00000000 | 0.00000000 | 0.60039600  |
| O | 0.00000000 | 0.00000000 | -0.60039600 |

**HO<sub>2</sub>**

Charge = 0 Multiplicity = 2

|   |             |             |            |
|---|-------------|-------------|------------|
| O | 0.05544500  | -0.60242800 | 0.00000000 |
| O | 0.05544500  | 0.71247200  | 0.00000000 |
| H | -0.88711900 | -0.88035600 | 0.00000000 |

**TS-1**

Charge = 0 Multiplicity = 2

|   |             |             |             |
|---|-------------|-------------|-------------|
| C | 1.69524700  | -0.51308200 | -0.79654500 |
| C | -0.14255800 | -0.10199700 | 1.23294700  |
| C | 0.78407900  | -1.60773500 | -0.48320800 |
| N | -0.08475500 | -1.33845700 | 0.58369200  |
| N | 0.73719500  | 0.85601600  | 0.76826900  |
| N | 1.55035400  | 0.72677600  | -0.31805200 |
| O | -0.91936000 | 0.10896100  | 2.15764900  |
| O | 0.78766600  | -2.69701800 | -1.04599600 |
| C | 0.62535500  | 2.22383000  | 1.29225200  |
| H | 0.31920500  | 2.15087200  | 2.34225700  |
| H | 1.63414000  | 2.65414800  | 1.24262300  |
| C | -1.03690100 | -2.37940200 | 1.00297500  |
| H | -1.19333900 | -2.25964500 | 2.08107700  |
| H | -0.55077500 | -3.34337000 | 0.81244000  |
| C | -2.35201400 | -2.29023200 | 0.25512400  |

|   |             |             |             |
|---|-------------|-------------|-------------|
| C | -3.38683000 | -1.46885400 | 0.73021600  |
| C | -2.53610400 | -2.99470900 | -0.94490100 |
| C | -4.58760900 | -1.36092600 | 0.02207400  |
| H | -3.23347700 | -0.90348300 | 1.65173900  |
| C | -3.73758200 | -2.88798700 | -1.65264900 |
| H | -1.72180500 | -3.61529700 | -1.32607000 |
| C | -4.76667000 | -2.07136200 | -1.17041100 |
| H | -5.38675500 | -0.71888900 | 0.40215300  |
| H | -3.87054800 | -3.44345500 | -2.58485600 |
| H | -5.70592300 | -1.98764300 | -1.72348500 |
| C | -0.36033300 | 3.05462400  | 0.49824100  |
| C | 0.07075600  | 3.81111500  | -0.60151900 |
| C | -1.72871500 | 3.02677800  | 0.81320000  |
| C | -0.84723300 | 4.53404000  | -1.37028400 |
| H | 1.13305800  | 3.82857400  | -0.85811700 |
| C | -2.64722200 | 3.74825300  | 0.04498800  |
| H | -2.06691400 | 2.42191800  | 1.65748100  |
| C | -2.20849800 | 4.50424800  | -1.04836400 |
| H | -0.49887900 | 5.12226000  | -2.22337000 |
| H | -3.70990600 | 3.71977000  | 0.29991000  |
| H | -2.92652800 | 5.06935100  | -1.64839300 |
| C | 3.47204000  | -1.39496900 | 0.31789100  |
| H | 3.67303800  | -2.08330600 | -0.50726000 |
| C | 2.94196000  | -1.99244300 | 1.58608800  |
| H | 2.21227700  | -2.78440300 | 1.37420500  |
| H | 3.76630500  | -2.44534000 | 2.16722300  |
| H | 2.46467900  | -1.23139900 | 2.22484300  |
| N | 4.31444900  | -0.33739500 | 0.42946100  |
| H | 4.15371600  | 0.25748400  | 1.23857400  |
| C | 4.87588100  | 0.36506600  | -0.72152800 |
| C | 5.52587900  | -0.55991000 | -1.74501900 |
| H | 5.62641400  | 1.06841600  | -0.32935600 |
| H | 4.08834600  | 0.97501000  | -1.20343700 |
| H | 6.01710000  | 0.04145500  | -2.52473300 |
| H | 6.28533000  | -1.20154300 | -1.27077800 |
| H | 4.79143000  | -1.20817800 | -2.24752300 |
| H | 2.21508000  | -0.59350100 | -1.75336800 |

### INT-1

Charge = 0 Multiplicity = 2

|   |             |             |             |
|---|-------------|-------------|-------------|
| C | -1.42796800 | -0.75818700 | -0.10665300 |
| C | 0.86257200  | 0.14289700  | -1.46687000 |
| C | -1.39215700 | 0.66453000  | -0.65492600 |
| N | -0.19236200 | 1.03453200  | -1.24323800 |

|   |             |             |             |
|---|-------------|-------------|-------------|
| N | 0.56792700  | -1.20295100 | -1.26599700 |
| N | -0.56962000 | -1.70453700 | -0.77964500 |
| O | 1.95415900  | 0.51296000  | -1.86549700 |
| O | -2.30998800 | 1.45365400  | -0.52881900 |
| C | 1.60500600  | -2.19993600 | -1.59861300 |
| H | 1.06052900  | -3.08437000 | -1.95331600 |
| H | 2.21279700  | -1.79617100 | -2.41581500 |
| C | 0.02003900  | 2.45624900  | -1.59148200 |
| H | -0.94910000 | 2.84456800  | -1.92492200 |
| H | 0.72302500  | 2.47982400  | -2.43116500 |
| C | 0.54735700  | 3.25847800  | -0.42014300 |
| C | -0.33877200 | 3.91459300  | 0.44878900  |
| C | 1.92717200  | 3.32610300  | -0.16860200 |
| C | 0.14677900  | 4.63100500  | 1.54736700  |
| H | -1.41343100 | 3.85035600  | 0.26367700  |
| C | 2.41228100  | 4.04237300  | 0.92957500  |
| H | 2.61525900  | 2.80189300  | -0.83541500 |
| C | 1.52316600  | 4.69687200  | 1.78992600  |
| H | -0.55232800 | 5.13971400  | 2.21626400  |
| H | 3.48860700  | 4.09047400  | 1.11455600  |
| H | 1.90268100  | 5.25771900  | 2.64802400  |
| C | 2.45780000  | -2.52829200 | -0.39314400 |
| C | 3.61758200  | -1.78717500 | -0.11771000 |
| C | 2.06558300  | -3.54123000 | 0.49485000  |
| C | 4.37766400  | -2.06209700 | 1.02309700  |
| H | 3.91097100  | -0.98420600 | -0.79777100 |
| C | 2.82473500  | -3.81583100 | 1.63657100  |
| H | 1.15772800  | -4.11455400 | 0.29007500  |
| C | 3.98316700  | -3.07713300 | 1.90224800  |
| H | 5.28080300  | -1.48115200 | 1.22730900  |
| H | 2.51222500  | -4.60961200 | 2.31998000  |
| H | 4.57817100  | -3.29229100 | 2.79357600  |
| C | -2.85801700 | -1.34526600 | -0.00089000 |
| H | -2.70093500 | -2.38210700 | 0.34163600  |
| C | -3.52955700 | -1.39074500 | -1.38553200 |
| H | -2.85670200 | -1.85508300 | -2.12454200 |
| H | -4.45819300 | -1.97566600 | -1.35966900 |
| H | -3.77412400 | -0.37356100 | -1.72801100 |
| N | -3.58189600 | -0.65161800 | 1.05338700  |
| H | -3.87433800 | 0.27124200  | 0.73880000  |
| C | -4.63167900 | -1.35169000 | 1.77631300  |
| C | -5.95241100 | -1.62121300 | 1.03862200  |
| H | -4.85611500 | -0.75828400 | 2.68091500  |
| H | -4.21547400 | -2.30766100 | 2.14204600  |

|   |             |             |            |
|---|-------------|-------------|------------|
| H | -6.70879100 | -2.02135100 | 1.73447200 |
| H | -6.35133600 | -0.68960100 | 0.60310400 |
| H | -5.83204200 | -2.35083800 | 0.22352300 |
| H | -1.06365700 | -0.64600500 | 0.93889700 |

**4a**

Charge = 0 Multiplicity = 1

|   |             |             |             |
|---|-------------|-------------|-------------|
| C | 1.78789300  | -0.06371100 | -0.85261500 |
| C | -0.84469500 | 0.07191300  | -1.75426500 |
| C | 1.02523300  | -1.32626800 | -0.97199800 |
| N | -0.27637000 | -1.16447200 | -1.44562500 |
| N | 0.01346400  | 1.15304900  | -1.61906400 |
| N | 1.27494000  | 1.07951900  | -1.15982200 |
| O | -2.00337800 | 0.19203700  | -2.11769200 |
| O | 1.47597200  | -2.42581400 | -0.68628700 |
| C | -0.51454300 | 2.51514600  | -1.81008200 |
| H | 0.30914100  | 3.11092400  | -2.22286100 |
| H | -1.31602100 | 2.44888100  | -2.55490500 |
| C | -1.14492600 | -2.35610200 | -1.54094900 |
| H | -0.48852800 | -3.20073200 | -1.77874500 |
| H | -1.83370700 | -2.18527200 | -2.37549500 |
| C | -1.90338500 | -2.60849100 | -0.25395700 |
| C | -1.32845800 | -3.38118700 | 0.76782000  |
| C | -3.17223500 | -2.04272400 | -0.05232200 |
| C | -2.01357900 | -3.58933100 | 1.96868600  |
| H | -0.33397500 | -3.80702100 | 0.61725500  |
| C | -3.85708100 | -2.25152800 | 1.14876900  |
| H | -3.61244300 | -1.42764400 | -0.83990400 |
| C | -3.27973900 | -3.02536500 | 2.16168400  |
| H | -1.55727300 | -4.19404600 | 2.75675300  |
| H | -4.84563300 | -1.80819700 | 1.29458000  |
| H | -3.81577900 | -3.18869800 | 3.10026700  |
| C | -1.02194100 | 3.10642900  | -0.51229800 |
| C | -2.29756200 | 2.76834900  | -0.03069000 |
| C | -0.20366700 | 3.94913500  | 0.25358900  |
| C | -2.74589000 | 3.26966900  | 1.19434400  |
| H | -2.92925000 | 2.09948200  | -0.61963600 |
| C | -0.65327300 | 4.45367700  | 1.47851900  |
| H | 0.79322400  | 4.21032100  | -0.11154000 |
| C | -1.92510800 | 4.11423600  | 1.95137600  |
| H | -3.74033800 | 3.00098700  | 1.56006600  |
| H | -0.00793200 | 5.11263200  | 2.06513400  |
| H | -2.27711300 | 4.50748200  | 2.90858600  |
| C | 3.19854500  | -0.11535100 | -0.29317600 |
| H | 3.50785200  | 0.93728900  | -0.19545000 |



|   |            |             |             |
|---|------------|-------------|-------------|
| C | 4.16243100 | -0.82723500 | -1.25840900 |
| H | 4.15709000 | -0.34514700 | -2.24946700 |
| H | 5.18903500 | -0.79867300 | -0.86620300 |
| H | 3.86656600 | -1.87918200 | -1.38386700 |
| N | 3.12853700 | -0.68578100 | 1.04941100  |
| H | 3.20626900 | -1.69992300 | 1.01960000  |
| C | 3.94375800 | -0.08708400 | 2.09438300  |
| C | 5.46710300 | -0.16499800 | 1.92032300  |
| H | 3.66485100 | -0.57195400 | 3.04591500  |
| H | 3.64484500 | 0.97186900  | 2.19834300  |
| H | 5.98163000 | 0.25699600  | 2.79969600  |
| H | 5.79604200 | -1.21095000 | 1.80119000  |
| H | 5.80339800 | 0.39952800  | 1.03582300  |

### H<sub>2</sub>O<sub>2</sub>

Charge = 0 Multiplicity = 1

|   |             |             |            |
|---|-------------|-------------|------------|
| O | -0.00000400 | 0.72582300  | 0.00000000 |
| O | -0.00000400 | -0.72580600 | 0.00000000 |
| H | -0.95766200 | 0.88399400  | 0.00000000 |
| H | 0.95772000  | -0.88413200 | 0.00000000 |

### TS-2

Charge = 0 Multiplicity = 2

|   |             |             |             |
|---|-------------|-------------|-------------|
| C | -1.62720800 | -0.55241600 | -0.61601300 |
| C | 0.85314000  | 0.10379300  | -1.70076500 |
| C | -1.36991800 | 0.85045100  | -0.96304800 |
| N | -0.09207500 | 1.11003300  | -1.46599200 |
| N | 0.40647400  | -1.18832100 | -1.52886100 |
| N | -0.82356800 | -1.56995200 | -1.08926800 |
| O | 1.99798200  | 0.36510500  | -2.05523800 |
| O | -2.16476900 | 1.76914800  | -0.75368600 |
| C | 1.35377900  | -2.29150000 | -1.73539200 |
| H | 0.76244100  | -3.13191200 | -2.12246900 |
| H | 2.07590800  | -1.97831500 | -2.49822700 |
| C | 0.34338300  | 2.50965900  | -1.60894800 |
| H | -0.54179300 | 3.08763700  | -1.89794200 |
| H | 1.07544300  | 2.54003700  | -2.42357200 |
| C | 0.94196300  | 3.05602300  | -0.32791600 |
| C | 0.12361400  | 3.67199400  | 0.63264000  |
| C | 2.31402700  | 2.91546100  | -0.06494100 |
| C | 0.66850300  | 4.14671600  | 1.82994100  |
| H | -0.94710600 | 3.76189600  | 0.43635300  |
| C | 2.85897700  | 3.38963100  | 1.13231000  |
| H | 2.94599500  | 2.41676900  | -0.80275300 |

|   |             |             |             |
|---|-------------|-------------|-------------|
| C | 2.03796300  | 4.00763100  | 2.08249000  |
| H | 0.02173300  | 4.62740500  | 2.56888500  |
| H | 3.92926000  | 3.27640100  | 1.32463100  |
| H | 2.46443200  | 4.37949800  | 3.01789500  |
| C | 2.05732600  | -2.66917500 | -0.44904100 |
| C | 3.23021600  | -2.00255400 | -0.05928900 |
| C | 1.51103100  | -3.64130700 | 0.40199000  |
| C | 3.84947200  | -2.30977100 | 1.15580300  |
| H | 3.64217100  | -1.22924900 | -0.71167300 |
| C | 2.12942200  | -3.94935300 | 1.61831100  |
| H | 0.59194500  | -4.15520300 | 0.10868700  |
| C | 3.30089400  | -3.28468300 | 1.99743700  |
| H | 4.76326500  | -1.78567200 | 1.44820500  |
| H | 1.69607800  | -4.71119000 | 2.27180100  |
| H | 3.78572900  | -3.52588200 | 2.94704700  |
| C | -3.08521000 | -0.94171400 | -0.34050200 |
| H | -3.07843700 | -2.02838200 | -0.16720800 |
| C | -4.13516300 | -0.57327500 | -1.37973900 |
| H | -3.89373400 | -1.07605500 | -2.32894200 |
| H | -5.14011300 | -0.89568000 | -1.07124200 |
| H | -4.14628900 | 0.51140300  | -1.55406400 |
| N | -3.22581500 | -0.29580700 | 1.01064200  |
| H | -3.49156100 | 0.68630500  | 0.89577100  |
| C | -3.96105900 | -0.97018600 | 2.08769800  |
| C | -5.45786500 | -1.13921600 | 1.83377000  |
| H | -3.79290400 | -0.38099100 | 3.00270500  |
| H | -3.48394000 | -1.95066400 | 2.24732900  |
| H | -5.94082100 | -1.57864500 | 2.72056600  |
| H | -5.93841100 | -0.16900300 | 1.62824900  |
| H | -5.65130500 | -1.80811700 | 0.98158100  |
| H | -1.85252600 | -0.30534300 | 0.80335300  |

### INT-1-pAcid

Charge = 0 Multiplicity = 2

|   |             |             |             |
|---|-------------|-------------|-------------|
| C | -1.54108100 | -1.17873300 | -0.41737700 |
| C | 0.58159700  | -0.97793500 | -2.16891200 |
| C | -1.60528600 | -0.14861200 | -1.45223800 |
| N | -0.46277500 | -0.04436500 | -2.24170200 |
| N | 0.33086100  | -2.10655100 | -1.41305600 |
| N | -0.75412600 | -2.32130500 | -0.62301900 |
| O | 1.63591000  | -0.80595100 | -2.76593900 |
| O | -2.52018100 | 0.68203600  | -1.55222000 |
| C | 1.41472700  | -3.08615300 | -1.24853200 |
| H | 0.92503000  | -4.05634500 | -1.09179300 |

|   |             |             |             |
|---|-------------|-------------|-------------|
| H | 1.98923600  | -3.11952000 | -2.18132300 |
| C | -0.19625800 | 1.22532300  | -2.94280100 |
| H | -1.16796900 | 1.61644100  | -3.26483100 |
| H | 0.41086800  | 0.99718500  | -3.82530300 |
| C | 0.51105900  | 2.21231000  | -2.03283600 |
| C | -0.21577900 | 2.93456700  | -1.07098500 |
| C | 1.90373200  | 2.37011200  | -2.09011300 |
| C | 0.43686700  | 3.80009900  | -0.18873700 |
| H | -1.29718500 | 2.79836100  | -1.00762100 |
| C | 2.55679200  | 3.24380700  | -1.21385300 |
| H | 2.47606100  | 1.78821600  | -2.81564800 |
| C | 1.82535300  | 3.96072700  | -0.26119500 |
| H | -0.13815200 | 4.34026100  | 0.56701300  |
| H | 3.64251600  | 3.35773500  | -1.26972000 |
| H | 2.33587000  | 4.63271400  | 0.43322600  |
| C | 2.29982500  | -2.72387100 | -0.07397300 |
| C | 3.41257800  | -1.88640600 | -0.25214900 |
| C | 1.97062300  | -3.15370500 | 1.21991300  |
| C | 4.19002600  | -1.49885900 | 0.84265600  |
| H | 3.65008800  | -1.52574500 | -1.25505100 |
| C | 2.74555900  | -2.76389000 | 2.31690200  |
| H | 1.09480600  | -3.79079800 | 1.36681000  |
| C | 3.85935400  | -1.93767400 | 2.13011400  |
| H | 5.05445900  | -0.84690600 | 0.69217700  |
| H | 2.48017100  | -3.10688400 | 3.32040600  |
| H | 4.46699900  | -1.63365900 | 2.98640700  |
| C | -2.84098800 | -1.50142300 | 0.31422900  |
| H | -2.58063600 | -2.10898300 | 1.19441700  |
| C | -3.84844200 | -2.25240400 | -0.55123400 |
| H | -3.34758200 | -3.14686400 | -0.94742300 |
| H | -4.73147600 | -2.58097500 | 0.01605300  |
| H | -4.17296900 | -1.63302300 | -1.40121100 |
| N | -3.39948000 | -0.20611700 | 0.84680700  |
| H | -3.53456600 | 0.39643900  | 0.01133300  |
| C | -4.62020300 | -0.26884800 | 1.71274200  |
| C | -5.90423700 | 0.03368300  | 0.95496600  |
| H | -4.46738800 | 0.46650200  | 2.51554400  |
| H | -4.64404500 | -1.26285900 | 2.18228500  |
| H | -6.75596000 | -0.00527500 | 1.65004900  |
| H | -5.87401800 | 1.04355400  | 0.51596700  |
| H | -6.08986400 | -0.68947200 | 0.14850100  |
| H | -0.68822400 | -0.48112900 | 0.45468400  |
| C | 0.84291100  | 1.89395100  | 2.50411700  |
| O | 0.51286000  | 2.83764900  | 3.18514300  |

|   |             |            |            |
|---|-------------|------------|------------|
| C | 2.26432600  | 1.50108400 | 2.21917900 |
| H | 2.43544300  | 1.51601200 | 1.13195100 |
| H | 2.95446500  | 2.18749800 | 2.72634700 |
| H | 2.43915200  | 0.46153200 | 2.53664100 |
| C | -0.25697200 | 0.99795300 | 1.85945300 |
| O | 0.19864200  | 0.07045800 | 1.10094400 |
| O | -1.44659700 | 1.22477200 | 2.10648000 |
| H | -2.62803700 | 0.29201500 | 1.37560200 |

### TS-2-pAcid

Charge = 0 Multiplicity = 2

|   |             |             |             |
|---|-------------|-------------|-------------|
| C | -1.54108100 | -1.17873300 | -0.41737700 |
| C | 0.58159700  | -0.97793500 | -2.16891200 |
| C | -1.60528600 | -0.14861200 | -1.45223800 |
| N | -0.46277500 | -0.04436500 | -2.24170200 |
| N | 0.33086100  | -2.10655100 | -1.41305600 |
| N | -0.75412600 | -2.32130500 | -0.62301900 |
| O | 1.63591000  | -0.80595100 | -2.76593900 |
| O | -2.52018100 | 0.68203600  | -1.55222000 |
| C | 1.41472700  | -3.08615300 | -1.24853200 |
| H | 0.92503000  | -4.05634500 | -1.09179300 |
| H | 1.98923600  | -3.11952000 | -2.18132300 |
| C | -0.19625800 | 1.22532300  | -2.94280100 |
| H | -1.16796900 | 1.61644100  | -3.26483100 |
| H | 0.41086800  | 0.99718500  | -3.82530300 |
| C | 0.51105900  | 2.21231000  | -2.03283600 |
| C | -0.21577900 | 2.93456700  | -1.07098500 |
| C | 1.90373200  | 2.37011200  | -2.09011300 |
| C | 0.43686700  | 3.80009900  | -0.18873700 |
| H | -1.29718500 | 2.79836100  | -1.00762100 |
| C | 2.55679200  | 3.24380700  | -1.21385300 |
| H | 2.47606100  | 1.78821600  | -2.81564800 |
| C | 1.82535300  | 3.96072700  | -0.26119500 |
| H | -0.13815200 | 4.34026100  | 0.56701300  |
| H | 3.64251600  | 3.35773500  | -1.26972000 |
| H | 2.33587000  | 4.63271400  | 0.43322600  |
| C | 2.29982500  | -2.72387100 | -0.07397300 |
| C | 3.41257800  | -1.88640600 | -0.25214900 |
| C | 1.97062300  | -3.15370500 | 1.21991300  |
| C | 4.19002600  | -1.49885900 | 0.84265600  |
| H | 3.65008800  | -1.52574500 | -1.25505100 |
| C | 2.74555900  | -2.76389000 | 2.31690200  |
| H | 1.09480600  | -3.79079800 | 1.36681000  |
| C | 3.85935400  | -1.93767400 | 2.13011400  |

|   |             |             |             |
|---|-------------|-------------|-------------|
| H | 5.05445900  | -0.84690600 | 0.69217700  |
| H | 2.48017100  | -3.10688400 | 3.32040600  |
| H | 4.46699900  | -1.63365900 | 2.98640700  |
| C | -2.84098800 | -1.50142300 | 0.31422900  |
| H | -2.58063600 | -2.10898300 | 1.19441700  |
| C | -3.84844200 | -2.25240400 | -0.55123400 |
| H | -3.34758200 | -3.14686400 | -0.94742300 |
| H | -4.73147600 | -2.58097500 | 0.01605300  |
| H | -4.17296900 | -1.63302300 | -1.40121100 |
| N | -3.39948000 | -0.20611700 | 0.84680700  |
| H | -3.53456600 | 0.39643900  | 0.01133300  |
| C | -4.62020300 | -0.26884800 | 1.71274200  |
| C | -5.90423700 | 0.03368300  | 0.95496600  |
| H | -4.46738800 | 0.46650200  | 2.51554400  |
| H | -4.64404500 | -1.26285900 | 2.18228500  |
| H | -6.75596000 | -0.00527500 | 1.65004900  |
| H | -5.87401800 | 1.04355400  | 0.51596700  |
| H | -6.08986400 | -0.68947200 | 0.14850100  |
| H | -0.68822400 | -0.48112900 | 0.45468400  |
| C | 0.84291100  | 1.89395100  | 2.50411700  |
| O | 0.51286000  | 2.83764900  | 3.18514300  |
| C | 2.26432600  | 1.50108400  | 2.21917900  |
| H | 2.43544300  | 1.51601200  | 1.13195100  |
| H | 2.95446500  | 2.18749800  | 2.72634700  |
| H | 2.43915200  | 0.46153200  | 2.53664100  |
| C | -0.25697200 | 0.99795300  | 1.85945300  |
| O | 0.19864200  | 0.07045800  | 1.10094400  |
| O | -1.44659700 | 1.22477200  | 2.10648000  |
| H | -2.62803700 | 0.29201500  | 1.37560200  |

### INT-2-pAcid

Charge = 0 Multiplicity = 2

|   |             |             |             |
|---|-------------|-------------|-------------|
| C | 1.73155900  | -1.37141600 | 0.21402900  |
| C | -0.27240000 | -1.24923200 | 2.12660500  |
| C | 1.97758800  | -0.60833400 | 1.37292600  |
| N | 0.88610400  | -0.48721700 | 2.26795900  |
| N | -0.34791300 | -2.01640600 | 0.98782300  |
| N | 0.53270000  | -1.93945700 | -0.08327300 |
| O | -1.16958300 | -1.22217800 | 2.96566300  |
| O | 3.04893300  | 0.02210800  | 1.60508100  |
| C | -1.50735300 | -2.88402800 | 0.77979400  |
| H | -1.14346100 | -3.78250100 | 0.26230200  |
| H | -1.86735800 | -3.17441100 | 1.77546300  |
| C | 0.79626600  | 0.71629400  | 3.10909100  |

|   |             |             |             |
|---|-------------|-------------|-------------|
| H | 1.82273500  | 1.00657000  | 3.35966800  |
| H | 0.25646100  | 0.45663500  | 4.02668000  |
| C | 0.08220200  | 1.80822900  | 2.33460400  |
| C | 0.76448600  | 2.50968200  | 1.32590500  |
| C | -1.29069000 | 2.03802500  | 2.51176100  |
| C | 0.08728400  | 3.41845000  | 0.50877200  |
| H | 1.82809700  | 2.31360700  | 1.17151000  |
| C | -1.96916400 | 2.95239800  | 1.69850800  |
| H | -1.83062600 | 1.47673200  | 3.27758700  |
| C | -1.28274700 | 3.64137100  | 0.69248800  |
| H | 0.62128300  | 3.93552200  | -0.29152000 |
| H | -3.03977000 | 3.11910000  | 1.84384300  |
| H | -1.81377900 | 4.34353800  | 0.04485700  |
| C | -2.63319800 | -2.24024700 | -0.00733000 |
| C | -3.37773900 | -1.18784500 | 0.55354600  |
| C | -2.94782700 | -2.67938400 | -1.29924800 |
| C | -4.41773800 | -0.59513700 | -0.16511200 |
| H | -3.12750600 | -0.84138600 | 1.55823700  |
| C | -3.99145900 | -2.08735200 | -2.02093800 |
| H | -2.36964800 | -3.49259700 | -1.74733600 |
| C | -4.72983200 | -1.04457400 | -1.45469900 |
| H | -4.98939400 | 0.22249500  | 0.28209100  |
| H | -4.22584200 | -2.44172200 | -3.02824200 |
| H | -5.54449300 | -0.57996700 | -2.01627400 |
| C | 2.82045800  | -1.50558700 | -0.82161500 |
| H | 2.36235400  | -1.81211100 | -1.77422000 |
| C | 3.89523900  | -2.51268900 | -0.41457000 |
| H | 3.40879500  | -3.48342600 | -0.24409900 |
| H | 4.65926500  | -2.65165200 | -1.19443400 |
| H | 4.38078800  | -2.19906700 | 0.52102800  |
| N | 3.38706700  | -0.12047400 | -1.04395500 |
| H | 3.60197400  | 0.21906700  | -0.07209000 |
| C | 4.52736100  | 0.05536500  | -1.99530700 |
| C | 5.87954600  | 0.10287800  | -1.29906200 |
| H | 4.34195100  | 0.99694100  | -2.53142100 |
| H | 4.47381300  | -0.75506000 | -2.73670500 |
| H | 6.67009500  | 0.26347700  | -2.04696300 |
| H | 5.92169300  | 0.93529600  | -0.57902000 |
| H | 6.10391400  | -0.82908300 | -0.76192900 |
| H | -0.17277100 | -0.94542500 | -1.15781400 |
| C | -1.09923600 | 2.03887800  | -2.33804600 |
| O | -0.62081900 | 3.04969500  | -2.79619200 |
| C | -2.56512900 | 1.80171800  | -2.13063900 |
| H | -2.75345900 | 1.60569500  | -1.06324700 |

|   |             |             |             |
|---|-------------|-------------|-------------|
| H | -3.13779400 | 2.67436400  | -2.46913200 |
| H | -2.88524500 | 0.89085100  | -2.65889600 |
| C | -0.13202000 | 0.89898500  | -1.90125700 |
| O | -0.75545100 | -0.20105100 | -1.58595500 |
| O | 1.07205500  | 1.09324500  | -1.88481000 |
| H | 2.56840500  | 0.44016500  | -1.36130700 |

### TS-3-pAcid

Charge = 0 Multiplicity = 2

|   |             |             |             |
|---|-------------|-------------|-------------|
| C | 1.70724300  | -1.53742800 | -1.03852900 |
| C | -0.36940300 | -0.05686100 | -2.21901800 |
| C | 0.40455100  | -2.18014600 | -1.19327000 |
| N | -0.59266700 | -1.35722900 | -1.75616500 |
| N | 0.90320300  | 0.42310200  | -2.01504900 |
| N | 1.86300000  | -0.18963400 | -1.25468400 |
| O | -1.24765800 | 0.59549200  | -2.77046700 |
| O | 0.13378300  | -3.33101800 | -0.86119500 |
| C | 1.24253600  | 1.77875000  | -2.46569300 |
| H | 2.29304500  | 1.74115600  | -2.78370100 |
| H | 0.61430700  | 1.99269200  | -3.33847800 |
| C | -1.95037400 | -1.89634300 | -1.91619500 |
| H | -1.84580800 | -2.98737800 | -1.94570000 |
| H | -2.33992400 | -1.54561800 | -2.87872500 |
| C | -2.88103000 | -1.49298600 | -0.79046600 |
| C | -2.67855700 | -1.99642500 | 0.50591400  |
| C | -3.95275600 | -0.61920800 | -1.02069700 |
| C | -3.54068100 | -1.64107800 | 1.54658100  |
| H | -1.83697000 | -2.66740900 | 0.69166100  |
| C | -4.82141900 | -0.26929200 | 0.01975600  |
| H | -4.10243200 | -0.20682800 | -2.02146800 |
| C | -4.61824300 | -0.78056700 | 1.30519700  |
| H | -3.36208800 | -2.02618500 | 2.55290100  |
| H | -5.65395200 | 0.41211400  | -0.17361000 |
| H | -5.28965200 | -0.50082900 | 2.12079100  |
| C | 1.04391300  | 2.83110300  | -1.39617300 |
| C | -0.21073500 | 3.43350400  | -1.21958800 |
| C | 2.09430300  | 3.17677700  | -0.53370000 |
| C | -0.40882000 | 4.37175500  | -0.20305300 |
| H | -1.03470100 | 3.14462400  | -1.87626100 |
| C | 1.89513400  | 4.10715500  | 0.49139200  |
| H | 3.07321300  | 2.70774200  | -0.66403000 |
| C | 0.64280700  | 4.70778200  | 0.65805200  |
| H | -1.38899600 | 4.83926400  | -0.07794400 |
| H | 2.72050100  | 4.36681600  | 1.15951800  |

|   |             |             |             |
|---|-------------|-------------|-------------|
| H | 0.48665300  | 5.43897000  | 1.45547200  |
| C | 2.83722900  | -2.22098100 | -0.52352400 |
| H | 3.76052500  | -1.65986100 | -0.68499600 |
| C | 2.98694200  | -3.71600900 | -0.49790800 |
| H | 2.94853600  | -4.10862900 | -1.52805200 |
| H | 3.95623500  | -3.99725400 | -0.06132700 |
| H | 2.17295400  | -4.19874200 | 0.05538300  |
| N | 2.92166000  | -1.86645800 | 1.50426800  |
| H | 3.30917500  | -2.67388500 | 1.99625400  |
| C | 3.62559400  | -0.62464900 | 1.84282800  |
| C | 5.13757700  | -0.78525700 | 1.75704200  |
| H | 3.33723000  | -0.28400700 | 2.85421000  |
| H | 3.28465800  | 0.14942300  | 1.13583900  |
| H | 5.63793800  | 0.16409000  | 1.99995300  |
| H | 5.49529000  | -1.54714700 | 2.46957600  |
| H | 5.45622800  | -1.08791300 | 0.74718100  |
| H | 1.06126300  | 0.46054400  | 0.36180300  |
| C | -1.46354100 | 0.67037700  | 2.45653700  |
| O | -1.75331400 | 0.28023100  | 3.56252600  |
| C | -2.21025200 | 1.71042300  | 1.67801300  |
| H | -2.51895200 | 1.29008000  | 0.70690200  |
| H | -3.08959200 | 2.04129100  | 2.24379100  |
| H | -1.54273300 | 2.55648800  | 1.45230300  |
| C | -0.21942000 | 0.04693600  | 1.76879500  |
| O | 0.29054300  | 0.85031900  | 0.85296300  |
| O | 0.20839700  | -1.04416200 | 2.07641500  |
| H | 1.92207800  | -1.79296200 | 1.72646000  |

## INT-2

Charge = 0 Multiplicity = 2

|   |             |             |             |
|---|-------------|-------------|-------------|
| C | -1.46791600 | -1.06208200 | -0.48876400 |
| C | 0.69253900  | 0.03505800  | -1.81400400 |
| C | -1.55558400 | 0.28478700  | -0.87069600 |
| N | -0.42854400 | 0.81474200  | -1.54947100 |
| N | 0.60530300  | -1.29232500 | -1.45083900 |
| N | -0.42893200 | -1.88491900 | -0.75244700 |
| O | 1.69851200  | 0.51008500  | -2.34028900 |
| O | -2.54857700 | 1.05435600  | -0.61681200 |
| C | 1.79273700  | -2.13662600 | -1.57717900 |
| H | 1.44093500  | -3.14658000 | -1.83047900 |
| H | 2.39044800  | -1.74804300 | -2.41042100 |
| C | -0.30760200 | 2.26636700  | -1.71697600 |
| H | -1.32486800 | 2.65435500  | -1.84440800 |
| H | 0.26758800  | 2.45162500  | -2.63169300 |



|   |             |             |             |
|---|-------------|-------------|-------------|
| C | 0.36454300  | 2.91611200  | -0.52141000 |
| C | -0.37304200 | 3.18124200  | 0.64479800  |
| C | 1.73896700  | 3.19880300  | -0.53489300 |
| C | 0.25038500  | 3.72710100  | 1.77077300  |
| H | -1.43831800 | 2.93794700  | 0.65675500  |
| C | 2.36347400  | 3.74619700  | 0.59106800  |
| H | 2.31893800  | 2.96822000  | -1.43112600 |
| C | 1.62100100  | 4.01226000  | 1.74686200  |
| H | -0.33479400 | 3.93208700  | 2.67159000  |
| H | 3.43489300  | 3.96306300  | 0.56689500  |
| H | 2.10891700  | 4.43934600  | 2.62709900  |
| C | 2.60885000  | -2.15980000 | -0.29963500 |
| C | 3.39243700  | -1.04776400 | 0.05494500  |
| C | 2.55008800  | -3.25391200 | 0.57432000  |
| C | 4.10451000  | -1.03592800 | 1.25701800  |
| H | 3.42495500  | -0.18798600 | -0.61828900 |
| C | 3.26536900  | -3.24539200 | 1.77771800  |
| H | 1.93469900  | -4.11875000 | 0.31147800  |
| C | 4.04415200  | -2.13605800 | 2.12198900  |
| H | 4.70996500  | -0.16462800 | 1.52109300  |
| H | 3.21146500  | -4.10672300 | 2.44907100  |
| H | 4.60274600  | -2.12737600 | 3.06172400  |
| C | -2.67066600 | -1.69700200 | 0.17021000  |
| H | -2.34195200 | -2.57750200 | 0.74205100  |
| C | -3.74115600 | -2.10523100 | -0.84103400 |
| H | -3.27682400 | -2.80894900 | -1.54609300 |
| H | -4.60112700 | -2.61135300 | -0.37662100 |
| H | -4.09185600 | -1.23055700 | -1.40828500 |
| N | -3.19326500 | -0.68204500 | 1.17032900  |
| H | -3.18641100 | 0.22783400  | 0.57807300  |
| C | -4.48501500 | -0.94770600 | 1.88046400  |
| C | -5.67764000 | -0.28557600 | 1.20562000  |
| H | -4.36650600 | -0.55629100 | 2.90032800  |
| H | -4.60789700 | -2.03764800 | 1.96367600  |
| H | -6.58237200 | -0.47751700 | 1.80133600  |
| H | -5.53774700 | 0.80484200  | 1.14266500  |
| H | -5.85144600 | -0.67007900 | 0.19169500  |
| H | -2.44743600 | -0.54214400 | 1.85852800  |

### TS-3

Charge = 0 Multiplicity = 2

|   |             |             |             |
|---|-------------|-------------|-------------|
| C | 0.92040100  | -1.32067200 | -1.40873200 |
| C | -1.00357400 | 0.64544200  | -1.91949200 |
| C | -0.46835600 | -1.66862600 | -1.21348500 |

|   |             |             |             |
|---|-------------|-------------|-------------|
| N | -1.38656200 | -0.65333200 | -1.58467700 |
| N | 0.35063200  | 0.83974700  | -2.07970000 |
| N | 1.32310100  | -0.09577200 | -1.86771000 |
| O | -1.82361500 | 1.55009300  | -2.06101000 |
| O | -0.89817800 | -2.74139700 | -0.78152400 |
| C | 0.87322600  | 2.21175800  | -2.06809300 |
| H | 1.71614400  | 2.25138400  | -2.77211900 |
| H | 0.07765400  | 2.87822000  | -2.41867900 |
| C | -2.81871600 | -0.89861000 | -1.35816800 |
| H | -2.99618000 | -1.95919200 | -1.56970500 |
| H | -3.37190200 | -0.28832300 | -2.08130400 |
| C | -3.24941500 | -0.56346700 | 0.05902300  |
| C | -3.20051000 | -1.53841600 | 1.06868000  |
| C | -3.66693100 | 0.73603600  | 0.39081100  |
| C | -3.56460000 | -1.22202300 | 2.38151400  |
| H | -2.85474900 | -2.54248100 | 0.81547800  |
| C | -4.02938800 | 1.05331100  | 1.70380300  |
| H | -3.68787700 | 1.49889700  | -0.38949800 |
| C | -3.97959500 | 0.07509700  | 2.70342900  |
| H | -3.52418500 | -1.99191500 | 3.15697400  |
| H | -4.35355800 | 2.06880800  | 1.94727900  |
| H | -4.26463200 | 0.32245300  | 3.72953800  |
| C | 1.31685200  | 2.55920000  | -0.66090000 |
| C | 0.35954400  | 2.88727200  | 0.31287000  |
| C | 2.65774300  | 2.41601500  | -0.27407000 |
| C | 0.73607100  | 3.06815000  | 1.64708600  |
| H | -0.68943000 | 2.97689500  | 0.01888500  |
| C | 3.03697200  | 2.59444200  | 1.06203500  |
| H | 3.40658100  | 2.15021500  | -1.02447700 |
| C | 2.07579300  | 2.91893700  | 2.02594100  |
| H | -0.01981600 | 3.32063600  | 2.39526800  |
| H | 4.08527200  | 2.47943600  | 1.35059400  |
| H | 2.36992800  | 3.05653700  | 3.06962000  |
| C | 1.99825700  | -2.11750100 | -0.90347400 |
| H | 2.94853800  | -1.88742200 | -1.39966200 |
| C | 1.85677300  | -3.55249000 | -0.48025000 |
| H | 1.52705100  | -4.15170000 | -1.34374400 |
| H | 2.82054600  | -3.95243000 | -0.13462800 |
| H | 1.09437800  | -3.67770700 | 0.29820300  |
| N | 2.51606200  | -1.15364900 | 0.67219200  |
| H | 1.72248000  | -1.21123000 | 1.31574900  |
| C | 3.80371900  | -1.42851200 | 1.33579200  |
| C | 3.67686800  | -2.47106000 | 2.43814000  |
| H | 4.20848600  | -0.48852300 | 1.74837500  |

|   |            |             |            |
|---|------------|-------------|------------|
| H | 4.50915400 | -1.76314200 | 0.55623300 |
| H | 4.66208100 | -2.66748200 | 2.88647100 |
| H | 3.00636600 | -2.11730400 | 3.23848200 |
| H | 3.28092500 | -3.42281100 | 2.05498700 |
| H | 2.49165000 | -0.21605100 | 0.25648100 |

### INT-3

Charge = 0 Multiplicity = 2

|   |             |             |             |
|---|-------------|-------------|-------------|
| C | 0.21281900  | 2.57625400  | 0.19317800  |
| C | -0.10223500 | 0.37054000  | -1.51422400 |
| C | 1.42108100  | 1.79983300  | -0.20742700 |
| N | 1.16981000  | 0.73561400  | -1.07227900 |
| N | -1.13367600 | 1.18894600  | -1.07540200 |
| N | -1.01144000 | 2.23125300  | -0.24672500 |
| O | -0.29773000 | -0.59428500 | -2.23551800 |
| O | 2.55133900  | 2.04815100  | 0.17692600  |
| C | -2.51820500 | 0.80703200  | -1.41171600 |
| H | -3.08773000 | 1.74409100  | -1.44061400 |
| H | -2.50502200 | 0.36265100  | -2.41338400 |
| C | 2.30354600  | -0.12066400 | -1.47822200 |
| H | 3.18198100  | 0.53091200  | -1.54369400 |
| H | 2.06775200  | -0.50989500 | -2.47464700 |
| C | 2.54386100  | -1.25186400 | -0.49898000 |
| C | 3.43338200  | -1.08647600 | 0.57421800  |
| C | 1.85316900  | -2.46713600 | -0.63359700 |
| C | 3.63502900  | -2.12129700 | 1.49291900  |
| H | 3.95668700  | -0.13489300 | 0.69006900  |
| C | 2.05403900  | -3.50097500 | 0.28593700  |
| H | 1.14880800  | -2.59003500 | -1.45913700 |
| C | 2.94633200  | -3.33104400 | 1.35062400  |
| H | 4.33211400  | -1.98231700 | 2.32345000  |
| H | 1.51252100  | -4.44353700 | 0.17038200  |
| H | 3.10460300  | -4.14017800 | 2.06839900  |
| C | -3.09277900 | -0.15580600 | -0.39515200 |
| C | -2.97477800 | -1.54234000 | -0.57897700 |
| C | -3.69943700 | 0.33015700  | 0.77322500  |
| C | -3.46256400 | -2.42779600 | 0.38702600  |
| H | -2.48555800 | -1.92141700 | -1.47883900 |
| C | -4.18648400 | -0.55479400 | 1.73992300  |
| H | -3.78573400 | 1.40913500  | 0.92573400  |
| C | -4.06934900 | -1.93614700 | 1.54819700  |
| H | -3.36791500 | -3.50584600 | 0.23305500  |
| H | -4.66035500 | -0.16541300 | 2.64471500  |
| H | -4.45131700 | -2.62860100 | 2.30280100  |

|   |             |            |            |
|---|-------------|------------|------------|
| C | 0.30639200  | 3.68067100 | 1.04252200 |
| H | -0.65491800 | 4.15583000 | 1.26104400 |
| C | 1.53945700  | 4.25144500 | 1.65837300 |
| H | 2.28007900  | 4.53882300 | 0.89312100 |
| H | 1.29678900  | 5.13213000 | 2.26904300 |
| H | 2.05583100  | 3.50938600 | 2.29099700 |

### NH<sub>2</sub>Et

Charge = 0 Multiplicity = 1

|   |             |             |             |
|---|-------------|-------------|-------------|
| C | -0.05220300 | 0.55567600  | 0.05273200  |
| C | 1.24962300  | -0.23615900 | -0.02657600 |
| H | -0.06934900 | 1.30898100  | -0.75490100 |
| H | -0.06620300 | 1.12992100  | 1.00511700  |
| H | 2.12603800  | 0.42557100  | 0.06263100  |
| H | 1.30826400  | -0.97995500 | 0.78699800  |
| H | 1.31539500  | -0.77990200 | -0.98284200 |
| N | -1.20956100 | -0.32409800 | -0.12346100 |
| H | -1.26089500 | -0.97549500 | 0.66311700  |
| H | -2.07083900 | 0.22246500  | -0.07282800 |

## XII. References

- 1 P.-J. Huang and K.-H. Lee, *Med. Chem. Res.*, **2010**, *20*, 1081-1090.
- 2 C. Hwang, S. Y. Yang, C. L. Chuang and G. H. Lee, *Molecules*, **2017**, *22*, 1924.
- 3 M. J. Frisch, *et al. Gaussian 09, Revision D.01* (Gaussian, Inc.: Wallingford, CT, 2009).
- 4 P. Hohenberg, W. Kohn, *Phys. Rev.* **1964**, *136*(3B), 864
- 5 A. D. Becke, *J. Chem. Phys.* **1993**, *98*, 5648-5652
- 6 S. Grimme, S. Ehrlich, L. Goerigk, *J. Comput. Chem.* **2011**, *32*, 1456-1465
- 7 F. Weigend, R. Ahlrichs, *Phys. Chem. Chem. Phys.* **2005**, *7*, 3297-3305
- 8 Tomasi, B. Mennucci, and R. Cammi, *Chem. Rev.* **2005**, *105*, 2999-3094
- 9 A. V. Marenich, C. J. Cramer, D. G. Truhlar, *J. Phys. Chem. B.* **2009**, *113*, 6378-6396
- 10 Y. Zhao, D. G. Truhlar, *Acc. Chem. Res.* **2008**, *41*, 157-167
